# Supplementary material
Source: publisher figshare collection journal article supplement (https://acs.figshare.com/ndownloader/files/9365011)
Supplement: Supplementary file 1 [file 9365011]

## Sheet: PFOA
Note：the first four columns are gene and protein names, and the respective Uniprot and IPI no.,the cells with red protein names are male mice with dose-dependent protein changes, while the cells with highlighted background are female mice with dose-dependent change. The Column E is the full name of the proteins. From Column F to N, are following the same recycle as two columns of values of fold c…
					♀											♂
Uniprot	IPI	Gene Name	Protein Name	Function	0.05 ppm	0.05 ppm	0.05 ppm Average	0.5 ppm	0.5 ppm	0.5 ppm Average	2.5 ppm	2.5 ppm	2.5 ppm Average	Correlation	P value	0.05 ppm	0.05 ppm	0.05 ppm Average	0.5 ppm	0.5 ppm	0.5 ppm Average	2.5 ppm	2.5 ppm	2.5 ppm Average	Correlation	P value	Molecular Function
O09173	IPI00114330	Hgd	HGD	Homogentisate 1,2-dioxygenase	0.597	0.618	0.6075	0.491	0.508	0.4995	0.359	0.388	0.3735	-0.946845	0.00416306	0.921	0.96	0.9405	0.81	0.843	0.8265	0.284	0.32	0.302	-0.997888	6.68704e-06	GO:0016702 oxidoreductase activity, acting on single donors with incorporation of molecular oxygen, incorporation of two atoms of oxygen; GO:0016701 oxidoreductase activity, acting on single donors with incorporation of molecular oxygen; GO:0004411 homogentisate 1,2-dioxygenase activity; GO:0003824 catalytic activity; GO:0051213 dioxygenase activity; GO:0016491 oxidoreductase activity;
P70694	IPI00111950	Akr1c6	DHB5	Estradiol 17 beta-dehydrogenase 5	0.586	0.663	0.6245	0.502	0.539	0.5205	0.272	0.333	0.3025	-0.964686	0.00184863	0.826	0.839	0.8325	0.733	0.736	0.7345	0.308	0.361	0.3345	-0.997239	1.14272e-05	GO:0003824 catalytic activity; GO:0016491 oxidoreductase activity;
P07759	IPI00131830	Serpina3k	SPA3K	Serine protease inhibitor A3K	0.668	0.599	0.6335	0.381	0.343	0.362	0.171	0.229	0.2	-0.869191	0.0245474	0.96	0.937	0.9485	0.78	0.782	0.781	0.289	0.266	0.2775	-0.997094	1.26593e-05
P50544	IPI00119203	Acadvl	VLCAD	Very long-chain specific acyl-CoA dehydrogenase	0.736	0.68	0.708	0.654	0.623	0.6385	0.535	0.675	0.605	-0.592342	0.215404	0.976	0.983	0.9795	0.887	0.9	0.8935	0.626	0.598	0.612	-0.996949	1.39514e-05	GO:1901265 nucleoside phosphate binding; GO:0050660 flavin adenine dinucleotide binding; GO:0043167 ion binding; GO:0000166 nucleotide binding; GO:0048037 cofactor binding; GO:0016491 oxidoreductase activity; GO:0016627 oxidoreductase activity, acting on the CH-CH group of donors; GO:1901363 heterocyclic compound binding; GO:0097159 organic cyclic compound binding; GO:0003824 catalytic activity; …
Q8K2B3	IPI00230351	Sdha	SDHA	Succinate dehydrogenase [ubiquinone] flavoprotein subunit	0.615	0.546	0.5805	0.598	0.567	0.5825	0.446	0.437	0.4415	-0.932404	0.00669936	0.805	0.808	0.8065	0.727	0.725	0.726	0.406	0.448	0.427	-0.996806	1.52836e-05	GO:0097159 organic cyclic compound binding; GO:1901363 heterocyclic compound binding; GO:0016627 oxidoreductase activity, acting on the CH-CH group of donors; GO:1901265 nucleoside phosphate binding; GO:0050660 flavin adenine dinucleotide binding; GO:0003824 catalytic activity; GO:0005488 binding; GO:0043167 ion binding; GO:0043168 anion binding; GO:0000166 nucleotide binding; GO:0048037 cofactor…
E9Q7C8	IPI00114781	Cyp2c40	CYPIIC40	cytochrome P450 2C40	0.528	0.543	0.5355	0.458	0.452	0.455	0.267	0.296	0.2815	-0.98593	0.000295562	0.739	0.742	0.7405	0.624	0.623	0.6235	0.291	0.268	0.2795	-0.996736	1.59643e-05	GO:0097159 organic cyclic compound binding; GO:1901363 heterocyclic compound binding; GO:0020037 heme binding; GO:0005506 iron ion binding; GO:0046914 transition metal ion binding; GO:0003824 catalytic activity; GO:0005488 binding; GO:0043167 ion binding; GO:0043169 cation binding; GO:0046872 metal ion binding; GO:0016705 oxidoreductase activity, acting on paired donors, with incorporation or red…
P03911	IPI00116843	mt-Nd4	NU4M	NADH-ubiquinone oxidoreductase chain 4	0.571	0.534	0.5525	0.41		0.41	0.347	0.484	0.4155	-0.624415	0.260179	0.955	0.952	0.9535	0.828	0.82	0.824	0.372	0.298	0.335	-0.996408	1.93274e-05	GO:0050136 NADH dehydrogenase (quinone) activity; GO:0016651 oxidoreductase activity, acting on NAD(P)H; GO:0003954 NADH dehydrogenase activity; GO:0003824 catalytic activity; GO:0016655 oxidoreductase activity, acting on NAD(P)H, quinone or similar compound as acceptor; GO:0008137 NADH dehydrogenase (ubiquinone) activity; GO:0016491 oxidoreductase activity;
Q64374	IPI00133456	Rgn	RGN	Regucalcin	0.546	0.551	0.5485	0.565	0.571	0.568	0.202	0.22	0.211	-0.97488	0.000938595	0.845	0.857	0.851	0.744	0.8	0.772	0.332	0.361	0.3465	-0.996149	2.22184e-05	GO:0030234 enzyme regulator activity; GO:0005488 binding; GO:0043167 ion binding; GO:0046872 metal ion binding; GO:0043169 cation binding; GO:0005509 calcium ion binding; GO:0098772 molecular function regulator;
Q9JHI5	IPI00471246	Ivd	IVD	Isovaleryl-CoA dehydrogenase	0.743	0.696	0.7195	0.648	0.629	0.6385	0.369	0.4	0.3845	-0.99104	0.00012005	0.89	0.89	0.89	0.835	0.852	0.8435	0.409	0.407	0.408	-0.99606	2.3249e-05	GO:1901265 nucleoside phosphate binding; GO:0050660 flavin adenine dinucleotide binding; GO:0043167 ion binding; GO:0000166 nucleotide binding; GO:0048037 cofactor binding; GO:0016491 oxidoreductase activity; GO:0016627 oxidoreductase activity, acting on the CH-CH group of donors; GO:1901363 heterocyclic compound binding; GO:0097159 organic cyclic compound binding; GO:0003824 catalytic activity; …
P31809	IPI00108535	Ceacam1	CEAM1	Isoform Long of Carcinoembryonic antigen-related cell adhesion molecule 1	0.937	0.877	0.907	1.152	0.85	1.001	0.437	0.461	0.449	-0.886353	0.0186396	1.056	1.027	1.0415	0.995	0.975	0.985	0.504	0.492	0.498	-0.995939	2.47066e-05	GO:0005515 protein binding; GO:0005488 binding;
Q8VCH0	IPI00122139	Acaa1b	THIKB	3-ketoacyl-CoA thiolase B	1.062	1.126	1.094	2.612	2.61	2.611	6.158	6.677	6.4175	0.992048	9.46003e-05	0.952	1.001	0.9765	2.481	2.514	2.4975	7.895	7.164	7.5295	0.995898	2.52068e-05	GO:0016746 transferase activity, transferring acyl groups; GO:0016747 transferase activity, transferring acyl groups other than amino-acyl groups; GO:0016740 transferase activity; GO:0003824 catalytic activity;
P62835	IPI00138406	Rap1a	RAP1A	Ras-related protein Rap-1A	0.684	0.672	0.678	0.486	0.495	0.4905	0.469	0.491	0.48	-0.674929	0.141332	0.777	0.782	0.7795	0.723	0.758	0.7405	0.46	0.465	0.4625	-0.995528	2.99479e-05	GO:1901265 nucleoside phosphate binding; GO:0001882 nucleoside binding; GO:0043167 ion binding; GO:0000166 nucleotide binding; GO:0097159 organic cyclic compound binding; GO:1901363 heterocyclic compound binding; GO:0032549 ribonucleoside binding; GO:0097367 carbohydrate derivative binding; GO:0032553 ribonucleotide binding; GO:0005488 binding; GO:0032550 purine ribonucleoside binding; GO:0043168…
Q9QXF8	IPI00467066	Gnmt	GNMT	Glycine N-methyltransferase	0.652	0.641	0.6465	0.488	0.512	0.5	0.222	0.229	0.2255	-0.983471	0.000407537	0.892	0.859	0.8755	0.765	0.799	0.782	0.304	0.368	0.336	-0.995211	3.43497e-05	GO:0008757 S-adenosylmethionine-dependent methyltransferase activity; GO:0008168 methyltransferase activity; GO:0003824 catalytic activity; GO:0016741 transferase activity, transferring one-carbon groups; GO:0017174 glycine N-methyltransferase activity; GO:0008170 N-methyltransferase activity; GO:0016740 transferase activity;
Q6PGH2	IPI00107958	Hn1l	HN1L	Hematological and neurological expressed 1-like protein	2.169	1.896	2.0325	1.907	1.771	1.839	1.126	1.104	1.115	-0.97553	0.000890828	1.052	1.005	1.0285	1.092	1.086	1.089	1.644	1.62	1.632	0.995033	3.69513e-05
Q91VS7	IPI00331322	Mgst1	MGST1	Microsomal glutathione S-transferase 1	0.451	0.419	0.435	0.418	0.369	0.3935	0.52	0.514	0.517	0.828606	0.0415464	0.914	0.955	0.9345	0.759	0.804	0.7815	0.307	0.249	0.278	-0.99497	3.78885e-05
P51125	IPI00230641	Cast	ICAL	Isoform 2 of Calpastatin	1.654	1.913	1.7835	1.496	1.909	1.7025	1.488	1.849	1.6685	-0.221863	0.672665	1.12	1.05	1.085	1.246	1.191	1.2185	1.78	1.85	1.815	0.994736	4.1487e-05
P14148	IPI00311236	Rpl7	RL7	60S ribosomal protein L7	0.595	0.537	0.566	0.499	0.441	0.47	0.45	0.45	0.45	-0.685868	0.132519	0.795	0.79	0.7925	0.678	0.685	0.6815	0.386	0.4	0.393	-0.994699	4.20782e-05
Q8R0Y6	IPI00153317	Aldh1l1	FDH	Aldehyde dehydrogenase family 1 member L1	0.695	0.672	0.6835	0.582	0.578	0.58	0.18	0.19	0.185	-0.999115	1.17372e-06	0.778	0.781	0.7795	0.686	0.652	0.669	0.369	0.36	0.3645	-0.994578	4.40207e-05	GO:0016620 oxidoreductase activity, acting on the aldehyde or oxo group of donors, NAD or NADP as acceptor; GO:0016645 oxidoreductase activity, acting on the CH-NH group of donors; GO:0016646 oxidoreductase activity, acting on the CH-NH group of donors, NAD or NADP as acceptor; GO:0003824 catalytic activity; GO:0016903 oxidoreductase activity, acting on the aldehyde or oxo group of donors; GO:001…
P26043	IPI00308324	Rdx	RADI	Radixin	1.178	1.148	1.163	1.046	1.049	1.0475	0.768	0.848	0.808	-0.975097	0.000922485	1.164	1.247	1.2055	1.134	1.108	1.121	0.604	0.615	0.6095	-0.994535	4.47212e-05	GO:0003779 actin binding; GO:0005515 protein binding; GO:0008092 cytoskeletal protein binding; GO:0005488 binding;
P47738	IPI00111218	Aldh2	ALDHI	Aldehyde dehydrogenase	0.698	0.677	0.6875	0.695	0.648	0.6715	0.447	0.487	0.467	-0.977122	0.000779143	0.852	0.834	0.843	0.794	0.772	0.783	0.558	0.519	0.5385	-0.994358	4.76518e-05	GO:0016620 oxidoreductase activity, acting on the aldehyde or oxo group of donors, NAD or NADP as acceptor; GO:0003824 catalytic activity; GO:0016491 oxidoreductase activity; GO:0016903 oxidoreductase activity, acting on the aldehyde or oxo group of donors;
P06151	IPI00319994	Ldha	LDH-A	L-lactate dehydrogenase A chain	0.545	0.572	0.5585	0.448	0.509	0.4785	0.353	0.413	0.383	-0.898775	0.0148513	0.904	0.91	0.907	0.798	0.806	0.802	0.423	0.486	0.4545	-0.994245	4.95768e-05	GO:0016614 oxidoreductase activity, acting on CH-OH group of donors; GO:0004457 lactate dehydrogenase activity; GO:0016616 oxidoreductase activity, acting on the CH-OH group of donors, NAD or NADP as acceptor; GO:0004459 L-lactate dehydrogenase activity; GO:0003824 catalytic activity; GO:0016491 oxidoreductase activity;
Q9EQ06	IPI00110224	Hsd17b11	DHB11	Isoform 1 of Estradiol 17-beta-dehydrogenase 11	0.814	0.805	0.8095	1.276	1.356	1.316	5.602	6.11	5.856	0.994502	4.52602e-05	1.114	1.124	1.119	1.604	1.713	1.6585	3.172	3.423	3.2975	0.994166	5.09587e-05
Q2TPA8	IPI00117214	Hsdl2	HSDL2	Hydroxysteroid dehydrogenase-like protein 2	0.994	1.008	1.001	1.426	1.437	1.4315	2.541	2.76	2.6505	0.992644	8.09606e-05	1.212	1.244	1.228	1.712	1.735	1.7235	2.968	2.946	2.957	0.993951	5.47814e-05
Q6XVG2	IPI00409800	Cyp2c54	CYPIIC54	Cytochrome P450 2C54	0.579	0.553	0.566	0.396	0.402	0.399	0.209	0.219	0.214	-0.947468	0.00406693	0.901	0.863	0.882	0.69	0.729	0.7095	0.251	0.247	0.249	-0.99392	5.53333e-05	GO:0097159 organic cyclic compound binding; GO:1901363 heterocyclic compound binding; GO:0020037 heme binding; GO:0005506 iron ion binding; GO:0046914 transition metal ion binding; GO:0003824 catalytic activity; GO:0005488 binding; GO:0043167 ion binding; GO:0043169 cation binding; GO:0046872 metal ion binding; GO:0016705 oxidoreductase activity, acting on paired donors, with incorporation or red…
Q9CZX8	IPI00113241	Rps19	RS19	ps6 40S ribosomal protein S19	1.605	1.445	1.525	1.517	1.515	1.516	1.608	1.708	1.658	0.745903	0.0886452	0.998	0.981	0.9895	1.169	1.154	1.1615	1.693	1.805	1.749	0.993919	5.53616e-05	GO:0003735 structural constituent of ribosome; GO:0005198 structural molecule activity;
Q5XG73	IPI00229804	Acbd5	ACBD5	Isoform 3 of Acyl-CoA-binding domain-containing protein 5	1.497	1.449	1.473	1.985	2.005	1.995	2.06	2.255	2.1575	0.78388	0.0650144	1.154	1.237	1.1955	1.417	1.486	1.4515	3.221	3.503	3.362	0.993852	5.6586e-05	GO:0000062 fatty-acyl-CoA binding; GO:0005488 binding; GO:0043167 ion binding; GO:0043168 anion binding; GO:0048037 cofactor binding; GO:1901681 sulfur compound binding; GO:0050662 coenzyme binding;
P24456	IPI00323908	Cyp2d10	CYPIID10	Cytochrome P450 2D10	0.533	0.552	0.5425	0.38	0.422	0.401	0.426	0.494	0.46	-0.246004	0.638437	1.011	0.98	0.9955	0.77	0.807	0.7885	0.228	0.263	0.2455	-0.993819	5.71934e-05	GO:0097159 organic cyclic compound binding; GO:1901363 heterocyclic compound binding; GO:0020037 heme binding; GO:0005506 iron ion binding; GO:0046914 transition metal ion binding; GO:0003824 catalytic activity; GO:0005488 binding; GO:0043167 ion binding; GO:0043169 cation binding; GO:0046872 metal ion binding; GO:0016705 oxidoreductase activity, acting on paired donors, with incorporation or red…
Q8BFW7	IPI00221494	Lpp	LPP	Isoform 1 of Lipoma-preferred partner homolog	2.122	2.017	2.0695	1.801	1.936	1.8685	1.304	1.497	1.4005	-0.959101	0.00247489	1.148	1.204	1.176	1.224	1.331	1.2775	2.035	2.045	2.04	0.99376	5.82864e-05	GO:0043169 cation binding; GO:0046872 metal ion binding; GO:0008270 zinc ion binding; GO:0046914 transition metal ion binding; GO:0005488 binding; GO:0043167 ion binding;
Q9WVB0	IPI00122127	Rbpms	RBPMS	RNA-binding protein with multiple splicing isoform 2	1.73	1.583	1.6565	1.788	1.71	1.749	2.426	2.588	2.507	0.982165	0.000474289	1.205	1.143	1.174	1.309	1.217	1.263	1.985	1.978	1.9815	0.993451	6.41905e-05	GO:0097159 organic cyclic compound binding; GO:1901363 heterocyclic compound binding; GO:1901265 nucleoside phosphate binding; GO:0005488 binding; GO:0003676 nucleic acid binding; GO:0000166 nucleotide binding; GO:0036094 small molecule binding;
Q64442	IPI00753038	Sord	DHSO	Sorbitol dehydrogenase	0.722	0.667	0.6945	0.615	0.614	0.6145	0.344	0.376	0.36	-0.990157	0.000144845	0.786	0.837	0.8115	0.71	0.731	0.7205	0.44	0.443	0.4415	-0.992817	7.72005e-05	GO:0046914 transition metal ion binding; GO:0003824 catalytic activity; GO:0005488 binding; GO:0043167 ion binding; GO:0046872 metal ion binding; GO:0043169 cation binding; GO:0008270 zinc ion binding; GO:0016491 oxidoreductase activity;
Q99LB7	IPI00136213	Sardh	SARDH	Sarcosine dehydrogenase	0.66	0.634	0.647	0.511	0.508	0.5095	0.251	0.286	0.2685	-0.978138	0.000711716	0.83	0.894	0.862	0.738	0.78	0.759	0.407	0.401	0.404	-0.992775	7.81059e-05	GO:0005515 protein binding; GO:0003824 catalytic activity; GO:0005488 binding; GO:0016491 oxidoreductase activity;
Q9JKR6	IPI00123342	Hyou1	HYOU1	Hypoxia up-regulated protein 1	0.879	0.715	0.797	0.521	0.534	0.5275	0.455	0.509	0.482	-0.695051	0.125312	0.973	0.985	0.979	0.961	0.885	0.923	0.452	0.452	0.452	-0.992701	7.97295e-05
Q8BWP5	IPI00226356	Ttpa	TTPA	Alpha-tocopherol transfer protein	0.829	0.787	0.808	0.748	0.661	0.7045	0.552	0.589	0.5705	-0.919692	0.0094151	1.142	1.107	1.1245	1.075	1.024	1.0495	0.622	0.552	0.587	-0.992655	8.07338e-05	GO:0005215 transporter activity;
Q9D6Y9	IPI00109823	Gbe1	GLGB	1,4-alpha-glucan-branching enzyme	0.614	0.635	0.6245	0.92	0.937	0.9285	0.293	0.346	0.3195	-0.765561	0.0759998	0.893	0.884	0.8885	0.742	0.746	0.744	0.382	0.408	0.395	-0.992607	8.17807e-05	GO:0003844 1,4-alpha-glucan branching enzyme activity; GO:0016758 transferase activity, transferring hexosyl groups; GO:0003824 catalytic activity; GO:0005488 binding; GO:0016798 hydrolase activity, acting on glycosyl bonds; GO:0043167 ion binding; GO:0043169 cation binding; GO:0004553 hydrolase activity, hydrolyzing O-glycosyl compounds; GO:0016757 transferase activity, transferring glycosyl gro…
Q8K2Q9	IPI00169960	4930506M07Rik	SHOT1	Isoform 1 of Shootin-1	1.951	1.786	1.8685	2.039	1.932	1.9855	2.91	3.113	3.0115	0.984432	0.00036164	1.124	1.234	1.179	1.454	1.446	1.45	2.679	2.962	2.8205	0.992461	8.50408e-05
Q8C7E7	IPI00226656	Stbd1	STBD1	Starch-binding domain-containing protein 1	2.403	1.898	2.1505	3.192	2.554	2.873	2.904	2.595	2.7495	0.39986	0.432176	1.107	1.01	1.0585	1.242	1.144	1.193	1.819	1.796	1.8075	0.992418	8.60041e-05	GO:2001070 starch binding; GO:0030246 carbohydrate binding; GO:0030247 polysaccharide binding; GO:0001871 pattern binding; GO:0005488 binding;
Q9CR00	IPI00113287	Psmd9	PSMD9	Putative uncharacterized protein	1.731	1.727	1.729	1.495	1.581	1.538	1.281	1.253	1.267	-0.959694	0.0024041	1.257	1.129	1.193	1.367	1.306	1.3365	1.97	1.951	1.9605	0.9924	8.64307e-05	GO:0005515 protein binding; GO:0005488 binding;
P56654	IPI00114778	Cyp2c37	CYPIIC37	Cytochrome P450 2C37	0.542	0.532	0.537	0.454	0.562	0.508	0.471	0.812	0.6415	0.45042	0.37006	1.033	1.055	1.044	0.916	0.88	0.898	0.468	0.37	0.419	-0.992078	9.38815e-05	GO:0097159 organic cyclic compound binding; GO:1901363 heterocyclic compound binding; GO:0020037 heme binding; GO:0005506 iron ion binding; GO:0046914 transition metal ion binding; GO:0003824 catalytic activity; GO:0005488 binding; GO:0043167 ion binding; GO:0043169 cation binding; GO:0046872 metal ion binding; GO:0016705 oxidoreductase activity, acting on paired donors, with incorporation or red…
Q62425	IPI00125929	Ndufa4	NDUA4	NADH dehydrogenase [ubiquinone] 1 alpha subcomplex subunit 4	0.669	0.664	0.6665	0.697	0.67	0.6835	0.633	0.708	0.6705	-0.0369096	0.944661	0.837	0.845	0.841	0.82	0.787	0.8035	0.532	0.57	0.551	-0.992078	9.38918e-05
P50171	IPI00115598	H2-Ke6	DHB8	Isoform Short of Estradiol 17-beta-dehydrogenase 8	0.598	0.666	0.632	0.613	0.667	0.64	0.423	0.536	0.4795	-0.852983	0.0308322	0.996	0.995	0.9955	0.843	0.843	0.843	0.427	0.484	0.4555	-0.991995	9.58537e-05	GO:0003824 catalytic activity; GO:0016491 oxidoreductase activity;
P11725	IPI00116603	Otc	OTC	Ornithine carbamoyltransferase	0.661	0.699	0.68	0.528	0.523	0.5255	0.291	0.306	0.2985	-0.968338	0.00148788	0.874	0.893	0.8835	0.724	0.764	0.744	0.353	0.397	0.375	-0.991969	9.64969e-05	GO:0016597 amino acid binding; GO:0016743 carboxyl- or carbamoyltransferase activity; GO:0031406 carboxylic acid binding; GO:0003824 catalytic activity; GO:0005488 binding; GO:0043167 ion binding; GO:0043177 organic acid binding; GO:0016741 transferase activity, transferring one-carbon groups; GO:0043168 anion binding; GO:0016740 transferase activity; GO:0036094 small molecule binding;
P14211	IPI00123639	Calr	CALR	Calreticulin	1.025	1.013	1.019	0.719	0.752	0.7355	0.766	0.776	0.771	-0.547633	0.260669	1.075	0.999	1.037	0.935	0.958	0.9465	0.531	0.461	0.496	-0.991626	0.000104884	GO:0043169 cation binding; GO:0046872 metal ion binding; GO:0005515 protein binding; GO:0005509 calcium ion binding; GO:0051082 unfolded protein binding; GO:0005488 binding; GO:0043167 ion binding;
P61022	IPI00229680	1500003O03Rik	CHP	Calcium-binding protein p22	1.935	2.019	1.977	2.191	2.199	2.195	4.402	4.939	4.6705	0.986848	0.00025832	1.371	1.472	1.4215	1.855	1.826	1.8405	2.823	2.843	2.833	0.991485	0.000108445	GO:0043169 cation binding; GO:0046872 metal ion binding; GO:0005509 calcium ion binding; GO:0005488 binding; GO:0043167 ion binding;
Q9DBT9	IPI00120123	Dmgdh	M2GD	Dimethylglycine dehydrogenase	0.544	0.6	0.572	0.493	0.541	0.517	0.309	0.357	0.333	-0.969345	0.00139516	0.867	0.86	0.8635	0.73	0.743	0.7365	0.369	0.43	0.3995	-0.991292	0.000113425	GO:0005515 protein binding; GO:0003824 catalytic activity; GO:0005488 binding; GO:0016491 oxidoreductase activity;
Q63886	IPI00134691	Ugt1a1	UGT1-01	UDP-glucuronosyltransferase	0.589	0.617	0.603	0.541	0.627	0.584	0.748	0.864	0.806	0.892331	0.0167649	1.032	1.034	1.033	0.866	0.936	0.901	0.524	0.552	0.538	-0.990869	0.000124688	GO:0016757 transferase activity, transferring glycosyl groups; GO:0016758 transferase activity, transferring hexosyl groups; GO:0003824 catalytic activity; GO:0016740 transferase activity;
Q8CIM7	IPI00321644	Cyp2d26	CYPIID26	Cytochrome P450 2D26	0.629	0.55	0.5895	0.498	0.466	0.482	0.538	0.554	0.546	-0.0554047	0.916978	1.066	1.016	1.041	0.989	0.897	0.943	0.528	0.531	0.5295	-0.99079	0.000126835	GO:0097159 organic cyclic compound binding; GO:1901363 heterocyclic compound binding; GO:0020037 heme binding; GO:0005506 iron ion binding; GO:0046914 transition metal ion binding; GO:0003824 catalytic activity; GO:0005488 binding; GO:0043167 ion binding; GO:0043169 cation binding; GO:0046872 metal ion binding; GO:0016705 oxidoreductase activity, acting on paired donors, with incorporation or red…
Q9DBC0	IPI00321577	1300018J18Rik	SelO	Selenoprotein O	0.891	0.871	0.881	0.869	0.905	0.887	0.51	0.515	0.5125	-0.980207	0.000583752	1.073	1.029	1.051	1.017	1.033	1.025	0.599	0.614	0.6065	-0.990257	0.00014194
Q91ZA3	IPI00330523	Pcca	PCCA	Propionyl-CoA carboxylase alpha chain	0.784	0.774	0.779	0.771	0.775	0.773	0.563	0.624	0.5935	-0.968827	0.0014425	1.023	1.128	1.0755	0.98	1.003	0.9915	0.542	0.567	0.5545	-0.990157	0.000144856	GO:0005524 ATP binding; GO:1901265 nucleoside phosphate binding; GO:0001882 nucleoside binding; GO:0016874 ligase activity; GO:0043167 ion binding; GO:0000166 nucleotide binding; GO:0016879 ligase activity, forming carbon-nitrogen bonds; GO:0097159 organic cyclic compound binding; GO:1901363 heterocyclic compound binding; GO:0004075 biotin carboxylase activity; GO:0032549 ribonucleoside binding; …
Q07076	IPI00114017	Anxa7	ANXA7	Annexin A7	1.311	1.205	1.258	1.469	1.383	1.426	1.442	1.333	1.3875	0.375448	0.463289	1.179	1.125	1.152	1.301	1.191	1.246	2.024	1.926	1.975	0.99015	0.00014506	GO:0005544 calcium-dependent phospholipid binding; GO:0005488 binding; GO:0005543 phospholipid binding; GO:0043167 ion binding; GO:0008289 lipid binding; GO:0043169 cation binding; GO:0046872 metal ion binding; GO:0043168 anion binding; GO:0005509 calcium ion binding;
Q9CYZ2	IPI00319046	Tpd52l2	TPD54	Tumor protein D54	1.639	1.55	1.5945	1.395	1.31	1.3525	1.151	1.242	1.1965	-0.858884	0.0284655	1.424	1.371	1.3975	1.206	1.254	1.23	0.823	0.817	0.82	-0.990092	0.000146777
Q91WS4	IPI00471239	Bhmt2	BHMT2	Betaine--homocysteine S-methyltransferase 2	0.589	0.522	0.5555	0.497	0.466	0.4815	0.334	0.292	0.313	-0.963964	0.00192453	0.917	0.831	0.874	0.797	0.803	0.8	0.455	0.475	0.465	-0.989847	0.000154106	GO:0008168 methyltransferase activity; GO:0046914 transition metal ion binding; GO:0003824 catalytic activity; GO:0005488 binding; GO:0008172 S-methyltransferase activity; GO:0043167 ion binding; GO:0046872 metal ion binding; GO:0043169 cation binding; GO:0016741 transferase activity, transferring one-carbon groups; GO:0008270 zinc ion binding; GO:0047150 betaine-homocysteine S-methyltransferase …
Q63880	IPI00381178	Es31	EST3A	Isoform 1 of Liver carboxylesterase 31	0.902	0.871	0.8865	0.774	0.718	0.746	0.622	0.544	0.583	-0.927866	0.00761734	1.028	1.032	1.03	0.831	0.847	0.839	0.43	0.428	0.429	-0.989634	0.000160639
Q9DBG6	IPI00475154	Rpn2	RPN2	Dolichyl-diphosphooligosaccharide--protein glycosyltransferase subunit 2	0.725	0.753	0.739	0.62	0.643	0.6315	0.542	0.681	0.6115	-0.600186	0.207821	0.92	0.88	0.9	0.847	0.891	0.869	0.296	0.322	0.309	-0.989623	0.000160972
Q9DBG1	IPI00119685	Cyp27a1	CYP27A	Sterol 26-hydroxylase	0.803	0.75	0.7765	0.651	0.602	0.6265	0.302	0.311	0.3065	-0.983972	0.000383291	0.89	0.992	0.941	0.782	0.753	0.7675	0.277	0.306	0.2915	-0.989584	0.000162166	GO:0097159 organic cyclic compound binding; GO:1901363 heterocyclic compound binding; GO:0020037 heme binding; GO:0005506 iron ion binding; GO:0046914 transition metal ion binding; GO:0003824 catalytic activity; GO:0005488 binding; GO:0043167 ion binding; GO:0043169 cation binding; GO:0046872 metal ion binding; GO:0016705 oxidoreductase activity, acting on paired donors, with incorporation or red…
P35505	IPI00310035	Fah	FAAA	Fumarylacetoacetase	0.7	0.674	0.687	0.596	0.6	0.598	0.279	0.323	0.301	-0.994828	4.00508e-05	0.852	0.87	0.861	0.809	0.826	0.8175	0.527	0.587	0.557	-0.989577	0.000162377	GO:0004334 fumarylacetoacetase activity; GO:0016787 hydrolase activity; GO:0016823 hydrolase activity, acting on acid carbon-carbon bonds, in ketonic substances; GO:0003824 catalytic activity; GO:0016822 hydrolase activity, acting on acid carbon-carbon bonds;
Q8BP47	IPI00223415	Nars	SYNC	Asparaginyl-tRNA synthetase	0.598	0.627	0.6125	0.485	0.512	0.4985	0.555	0.703	0.629	0.357738	0.486284	0.91	0.915	0.9125	0.712	0.763	0.7375	0.306	0.349	0.3275	-0.989465	0.000165899	GO:0016876 ligase activity, forming aminoacyl-tRNA and related compounds; GO:0005524 ATP binding; GO:1901265 nucleoside phosphate binding; GO:0016875 ligase activity, forming carbon-oxygen bonds; GO:0016874 ligase activity; GO:0001882 nucleoside binding; GO:0043167 ion binding; GO:0000166 nucleotide binding; GO:0097159 organic cyclic compound binding; GO:1901363 heterocyclic compound binding; GO:…
P05202	IPI00117312	Got2	mAspAT	Aspartate aminotransferase	0.585	0.517	0.551	0.565	0.519	0.542	0.57	0.546	0.558	0.184221	0.726794	1.119	1.012	1.0655	0.866	0.853	0.8595	0.307	0.347	0.327	-0.989363	0.000169109	GO:0097159 organic cyclic compound binding; GO:1901363 heterocyclic compound binding; GO:0016769 transferase activity, transferring nitrogenous groups; GO:0003824 catalytic activity; GO:0005488 binding; GO:0043167 ion binding; GO:0043168 anion binding; GO:0008483 transaminase activity; GO:0016740 transferase activity; GO:0048037 cofactor binding; GO:0030170 pyridoxal phosphate binding;
Q8VC12	IPI00121267	Uroc1	HUTU	Urocanate hydratase	0.627	0.627	0.627	0.59	0.591	0.5905	0.322	0.394	0.358	-0.983984	0.000382695	0.761	0.803	0.782	0.677	0.72	0.6985	0.421	0.453	0.437	-0.989347	0.000169616	GO:0016153 urocanate hydratase activity; GO:0016829 lyase activity; GO:0016836 hydro-lyase activity; GO:0003824 catalytic activity; GO:0016835 carbon-oxygen lyase activity;
P16460	IPI00134746	Ass1	ASSY	Argininosuccinate synthase	0.664	0.605	0.6345	0.436	0.434	0.435	0.177	0.266	0.2215	-0.930415	0.00709465	0.719	0.756	0.7375	0.657	0.69	0.6735	0.276	0.356	0.316	-0.988931	0.000183093	GO:0005524 ATP binding; GO:0004055 argininosuccinate synthase activity; GO:1901265 nucleoside phosphate binding; GO:0016874 ligase activity; GO:0001882 nucleoside binding; GO:0043167 ion binding; GO:0000166 nucleotide binding; GO:0016879 ligase activity, forming carbon-nitrogen bonds; GO:0097159 organic cyclic compound binding; GO:1901363 heterocyclic compound binding; GO:0032549 ribonucleoside b…
Q01405	IPI00123349	Sec23a	SC23A	Protein transport protein Sec23A	0.486	0.507	0.4965	0.354	0.383	0.3685	0.42	0.466	0.443	-0.0751055	0.887554	0.821	0.849	0.835	0.778	0.837	0.8075	0.251	0.257	0.254	-0.988904	0.000183992	GO:0043169 cation binding; GO:0046872 metal ion binding; GO:0008270 zinc ion binding; GO:0046914 transition metal ion binding; GO:0005488 binding; GO:0043167 ion binding;
Q91WD5	IPI00128023	Ndufs2	NDUS2	NADH dehydrogenase [ubiquinone] iron-sulfur protein 2	0.725	0.63	0.6775	0.625	0.659	0.642	0.468	0.459	0.4635	-0.954383	0.00307396	0.907	0.911	0.909	0.913	0.868	0.8905	0.533	0.533	0.533	-0.988792	0.000187716	GO:0097159 organic cyclic compound binding; GO:1901363 heterocyclic compound binding; GO:0016651 oxidoreductase activity, acting on NAD(P)H; GO:1901265 nucleoside phosphate binding; GO:0051287 NAD binding; GO:0003824 catalytic activity; GO:0005488 binding; GO:0000166 nucleotide binding; GO:0048038 quinone binding; GO:0048037 cofactor binding; GO:0036094 small molecule binding; GO:0050662 coenzyme…
P52760	IPI00130640	Hrsp12	UK114	Ribonuclease UK114	1.105	1.057	1.081	1.479	1.482	1.4805	1.059	1.105	1.082	-0.339287	0.510598	0.893	0.89	0.8915	0.922	0.943	0.9325	1.835	1.932	1.8835	0.988717	0.000190233
Q91VA0	IPI00126625	Acsm1	ACSM1	Isoform 1 of Acyl-coenzyme A synthetase ACSM1	1.045	1.045	1.045	0.928	0.992	0.96	0.358	0.419	0.3885	-0.994733	4.15358e-05	0.912	0.903	0.9075	0.834	0.851	0.8425	0.624	0.672	0.648	-0.988553	0.000195808	GO:0003824 catalytic activity;
Q8VBT2	IPI00121348	Sds	SDHL	L-serine dehydratase/L-threonine deaminase	0.57	0.616	0.593	0.481	0.483	0.482	0.372	0.403	0.3875	-0.906064	0.0128216	0.893	0.899	0.896	0.874	0.887	0.8805	0.491	0.453	0.472	-0.988294	0.000204746	GO:0097159 organic cyclic compound binding; GO:1901363 heterocyclic compound binding; GO:0005488 binding; GO:0043167 ion binding; GO:0043168 anion binding; GO:0048037 cofactor binding; GO:0030170 pyridoxal phosphate binding;
Q80XL6	IPI00330747	Acad11	ACAD-11	Acyl-CoA dehydrogenase family member 11	0.651	0.671	0.661	0.819	0.871	0.845	1.506	1.607	1.5565	0.996053	2.33358e-05	1.099	0.946	1.0225	1.197	1.265	1.231	1.903	2.033	1.968	0.988095	0.000211751	GO:1901265 nucleoside phosphate binding; GO:0050660 flavin adenine dinucleotide binding; GO:0043167 ion binding; GO:0000166 nucleotide binding; GO:0048037 cofactor binding; GO:0016491 oxidoreductase activity; GO:0016627 oxidoreductase activity, acting on the CH-CH group of donors; GO:1901363 heterocyclic compound binding; GO:0097159 organic cyclic compound binding; GO:0003824 catalytic activity; …
P50247	IPI00230440	Ahcy	CUBP	Adenosylhomocysteinase	0.603	0.625	0.614	0.525	0.552	0.5385	0.311	0.377	0.344	-0.977522	0.000752243	0.868	0.82	0.844	0.782	0.843	0.8125	0.381	0.401	0.391	-0.987657	0.000227595	GO:0097159 organic cyclic compound binding; GO:1901363 heterocyclic compound binding; GO:0004013 adenosylhomocysteinase activity; GO:0016801 hydrolase activity, acting on ether bonds; GO:1901265 nucleoside phosphate binding; GO:0051287 NAD binding; GO:0003824 catalytic activity; GO:0005488 binding; GO:0016787 hydrolase activity; GO:0000166 nucleotide binding; GO:0048037 cofactor binding; GO:00168…
D3YYM6	IPI00857345	Rps5	RS5	Uncharacterized protein	1.027	1.084	1.0555	0.776	0.901	0.8385	0.845	0.845	0.845	-0.578349	0.229201	0.969	0.919	0.944	0.928	0.926	0.927	0.477	0.494	0.4855	-0.987572	0.000230728	GO:0097159 organic cyclic compound binding; GO:1901363 heterocyclic compound binding; GO:0003723 RNA binding; GO:0005488 binding; GO:0003676 nucleic acid binding; GO:0005198 structural molecule activity; GO:0003735 structural constituent of ribosome;
P58252	IPI00466069	Eef2	EF2	Elongation factor 2	0.615	0.654	0.6345	0.616	0.599	0.6075	0.57	0.639	0.6045	-0.354052	0.491112	0.876	0.927	0.9015	0.857	0.89	0.8735	0.472	0.514	0.493	-0.987292	0.000241201	GO:1901265 nucleoside phosphate binding; GO:0001882 nucleoside binding; GO:0043167 ion binding; GO:0016817 hydrolase activity, acting on acid anhydrides; GO:0016787 hydrolase activity; GO:0000166 nucleotide binding; GO:0017111 nucleoside-triphosphatase activity; GO:0097159 organic cyclic compound binding; GO:1901363 heterocyclic compound binding; GO:0032549 ribonucleoside binding; GO:0097367 carb…
Q8JZN5	IPI00331710	Acad9	ACAD-9	Acyl-CoA dehydrogenase family member 9	0.694	0.643	0.6685	0.619	0.621	0.62	0.435	0.525	0.48	-0.933949	0.00639997	0.982	0.902	0.942	0.779	0.821	0.8	0.444	0.428	0.436	-0.987193	0.000244993	GO:1901265 nucleoside phosphate binding; GO:0050660 flavin adenine dinucleotide binding; GO:0043167 ion binding; GO:0000166 nucleotide binding; GO:0048037 cofactor binding; GO:0016491 oxidoreductase activity; GO:0016627 oxidoreductase activity, acting on the CH-CH group of donors; GO:1901363 heterocyclic compound binding; GO:0097159 organic cyclic compound binding; GO:0003824 catalytic activity; …
Q9DCN2	IPI00121079	Cyb5r3	B5R	Isoform 1 of NADH-cytochrome b5 reductase 3	0.491	0.453	0.472	0.492	0.471	0.4815	0.344	0.313	0.3285	-0.951181	0.00351682	0.861	0.861	0.861	0.67	0.705	0.6875	0.328	0.338	0.333	-0.986912	0.000255807	GO:0003824 catalytic activity; GO:0016491 oxidoreductase activity;
Q8VCR7	IPI00111876	Abhd14b	ABHEB	Abhydrolase domain-containing protein 14B	0.938	0.8	0.869	1.081	1.02	1.0505	0.828	0.849	0.8385	-0.420869	0.405971	0.996	0.908	0.952	0.867	0.906	0.8865	0.489	0.536	0.5125	-0.986885	0.000256889
Q99MZ7	IPI00331596	Pecr	PECR	Peroxisomal trans-2-enoyl-CoA reductase	0.555	0.517	0.536	0.481	0.483	0.482	0.359	0.396	0.3775	-0.960181	0.00234679	0.876	0.887	0.8815	0.733	0.686	0.7095	0.261	0.341	0.301	-0.986867	0.000257567
Q91X34	IPI00314202	Baat	BAT	Bile acid-CoA:amino acid N-acyltransferase	0.711	0.618	0.6645	0.611	0.607	0.609	0.484	0.455	0.4695	-0.940523	0.00520115	0.876	0.851	0.8635	0.81	0.805	0.8075	0.447	0.535	0.491	-0.986689	0.000264578	GO:0016787 hydrolase activity; GO:0016790 thiolester hydrolase activity; GO:0003824 catalytic activity; GO:0016788 hydrolase activity, acting on ester bonds;
Q9EQF5	IPI00318577	Dpys	DPYS	Dihydropyrimidinase	0.602	0.579	0.5905	0.657	0.665	0.661	0.293	0.307	0.3	-0.935106	0.00618029	0.897	0.886	0.8915	0.761	0.778	0.7695	0.52	0.529	0.5245	-0.986509	0.000271789	GO:0016787 hydrolase activity; GO:0003824 catalytic activity; GO:0016810 hydrolase activity, acting on carbon-nitrogen (but not peptide) bonds;
Q9ERB0	IPI00321581	Snap29	SNP29	Synaptosomal-associated protein 29	1.904	1.737	1.8205	1.758	1.557	1.6575	1.389	1.545	1.467	-0.814882	0.0482309	1.154	1.21	1.182	1.287	1.254	1.2705	1.695	1.823	1.759	0.986463	0.000273633	GO:0005515 protein binding; GO:0005488 binding;
P23492	IPI00315452	Pnp	PNPH	Purine nucleoside phosphorylase	0.607	0.544	0.5755	0.426	0.455	0.4405	0.352	0.422	0.387	-0.779621	0.0674986	0.824	0.862	0.843	0.809	0.836	0.8225	0.303	0.361	0.332	-0.986429	0.000275012	GO:0004731 purine-nucleoside phosphorylase activity; GO:0016763 transferase activity, transferring pentosyl groups; GO:0016757 transferase activity, transferring glycosyl groups; GO:0003824 catalytic activity; GO:0016740 transferase activity;
P63325	IPI00112448	Rps10	RS10	40S ribosomal protein S10	1.66	1.711	1.6855	1.551	1.754	1.6525	1.194	1.509	1.3515	-0.806203	0.0526967	0.951	0.919	0.935	1.186	1.142	1.164	1.616	1.671	1.6435	0.986126	0.000287414
P16331	IPI00133549	Pah	PAH	Phenylalanine-4-hydroxylase	0.697	0.625	0.661	0.605	0.588	0.5965	0.358	0.32	0.339	-0.985287	0.000323117	0.961	1.036	0.9985	0.806	0.776	0.791	0.342	0.354	0.348	-0.985913	0.000296283	GO:0016597 amino acid binding; GO:0005506 iron ion binding; GO:0043167 ion binding; GO:0043177 organic acid binding; GO:0004505 phenylalanine 4-monooxygenase activity; GO:0016705 oxidoreductase activity, acting on paired donors, with incorporation or reduction of molecular oxygen; GO:0016491 oxidoreductase activity; GO:0031406 carboxylic acid binding; GO:0046914 transition metal ion binding; GO:0…
Q9R0H0	IPI00127558	Acox1	AOX-S	Peroxisomal acyl-coenzyme A oxidase 1	0.832	0.945	0.8885	1.254	1.399	1.3265	3.356	3.969	3.6625	0.988351	0.000202768	0.961	0.913	0.937	1.786	1.881	1.8335	4.006	4.753	4.3795	0.985838	0.000299402	GO:0016634 oxidoreductase activity, acting on the CH-CH group of donors, oxygen as acceptor; GO:1901265 nucleoside phosphate binding; GO:0050660 flavin adenine dinucleotide binding; GO:0043167 ion binding; GO:0003997 acyl-CoA oxidase activity; GO:0000166 nucleotide binding; GO:0048037 cofactor binding; GO:0016491 oxidoreductase activity; GO:0016627 oxidoreductase activity, acting on the CH-CH gro…
P48036	IPI00317309	Anxa5	ANXA5	Annexin A5	1.695	1.491	1.593	1.291	1.116	1.2035	1.264	1.349	1.3065	-0.381073	0.45606	0.978	1.021	0.9995	1.058	1.157	1.1075	1.955	1.772	1.8635	0.985823	0.000300071	GO:0005544 calcium-dependent phospholipid binding; GO:0005488 binding; GO:0005543 phospholipid binding; GO:0043167 ion binding; GO:0008289 lipid binding; GO:0043169 cation binding; GO:0046872 metal ion binding; GO:0043168 anion binding; GO:0005509 calcium ion binding;
Q3UIU2	IPI00341322	Ndufb6	NDUB6	NADH dehydrogenase [ubiquinone] 1 beta subcomplex subunit 6	0.586	0.594	0.59	0.468	0.498	0.483	0.287	0.312	0.2995	-0.975722	0.000876985	0.847	0.87	0.8585	0.825	0.873	0.849	0.226	0.238	0.232	-0.98578	0.000301895
Q05421	IPI00110556	Cyp2e1	CYPIIE1	Cytochrome P450 2E1	0.636	0.572	0.604	0.451	0.4	0.4255	0.477	0.367	0.422	-0.593507	0.214271	1.03	1.05	1.04	0.953	1.011	0.982	0.481	0.353	0.417	-0.985617	0.000308839	GO:0097159 organic cyclic compound binding; GO:1901363 heterocyclic compound binding; GO:0020037 heme binding; GO:0005506 iron ion binding; GO:0046914 transition metal ion binding; GO:0003824 catalytic activity; GO:0005488 binding; GO:0043167 ion binding; GO:0043169 cation binding; GO:0046872 metal ion binding; GO:0016705 oxidoreductase activity, acting on paired donors, with incorporation or red…
Q9DCQ2	IPI00471091	Aspdh	ASPD	Putative L-aspartate dehydrogenase	0.605	0.626	0.6155	0.573	0.536	0.5545	0.313	0.356	0.3345	-0.989107	0.000177353	0.823	0.867	0.845	0.724	0.8	0.762	0.421	0.471	0.446	-0.985595	0.00030974	GO:0097159 organic cyclic compound binding; GO:1901363 heterocyclic compound binding; GO:1901265 nucleoside phosphate binding; GO:0003824 catalytic activity; GO:0005488 binding; GO:0050661 NADP binding; GO:0033735 aspartate dehydrogenase activity; GO:0000166 nucleotide binding; GO:0016638 oxidoreductase activity, acting on the CH-NH2 group of donors; GO:0048037 cofactor binding; GO:0036094 small …
Q02053	IPI00123313	Uba1	UBA1	Ubiquitin-like modifier-activating enzyme 1	0.831	0.86	0.8455	0.742	0.757	0.7495	0.704	0.793	0.7485	-0.555932	0.25201	0.965	0.927	0.946	0.906	0.903	0.9045	0.633	0.695	0.664	-0.985354	0.000320187	GO:0008641 small protein activating enzyme activity; GO:0016877 ligase activity, forming carbon-sulfur bonds; GO:0003824 catalytic activity; GO:0016874 ligase activity;
P11714	IPI00116572	Cyp2d9	CYPIID9	Cytochrome P450 2D9	0.847	0.641	0.744	0.731	0.594	0.6625	0.548	0.396	0.472	-0.799536	0.056251	1.093	1.004	1.0485	0.943	1.01	0.9765	0.396	0.268	0.332	-0.985312	0.000322031	GO:0097159 organic cyclic compound binding; GO:1901363 heterocyclic compound binding; GO:0020037 heme binding; GO:0005506 iron ion binding; GO:0046914 transition metal ion binding; GO:0003824 catalytic activity; GO:0005488 binding; GO:0043167 ion binding; GO:0043169 cation binding; GO:0046872 metal ion binding; GO:0016705 oxidoreductase activity, acting on paired donors, with incorporation or red…
P61161	IPI00177038	Actr2	ARP2	Actin-related protein 2	0.666	0.646	0.656	0.446	0.432	0.439	0.387	0.42	0.4035	-0.731935	0.0981571	0.81	0.794	0.802	0.78	0.815	0.7975	0.418	0.43	0.424	-0.984619	0.000353037
Q99P30	IPI00119755	Nudt7	NUDT7	Isoform 2 of Peroxisomal coenzyme A diphosphatase NUDT7	0.838	0.929	0.8835	1.129	0.953	1.041	1.259	1.383	1.321	0.920114	0.00931774	0.876	0.944	0.91	0.817	0.8	0.8085	0.476	0.541	0.5085	-0.984579	0.000354873	GO:0000287 magnesium ion binding; GO:0046914 transition metal ion binding; GO:0003824 catalytic activity; GO:0005488 binding; GO:0043167 ion binding; GO:0046872 metal ion binding; GO:0043169 cation binding; GO:0016817 hydrolase activity, acting on acid anhydrides; GO:0016787 hydrolase activity; GO:0016818 hydrolase activity, acting on acid anhydrides, in phosphorus-containing anhydrides; GO:00301…
Q76MZ3	IPI00310091	Ppp2r1a	2AAA	Serine/threonine-protein phosphatase 2A 65 kDa regulatory subunit A alpha isoform	0.707	0.74	0.7235	0.699	0.717	0.708	0.803	0.906	0.8545	0.868335	0.0248623	0.841	0.808	0.8245	0.712	0.735	0.7235	0.51	0.519	0.5145	-0.984341	0.000365891	GO:0005515 protein binding; GO:0005488 binding;
P12710	IPI00120451	Fabp1	L-FABP—S	Fatty acid-binding protein, liver	1.506	1.323	1.4145	3.22	2.914	3.067	3.508	3.622	3.565	0.790177	0.0614198	1.53	1.624	1.577	2.277	2.496	2.3865	3.937	4.189	4.063	0.983953	0.000384184	GO:0008289 lipid binding; GO:0005488 binding; GO:0005215 transporter activity;
O55125	IPI00115824	Nipsnap1	NIPS1	Protein NipSnap homolog 1	0.619	0.612	0.6155	0.527	0.555	0.541	0.346	0.377	0.3615	-0.986819	0.000259444	0.841	0.837	0.839	0.796	0.773	0.7845	0.487	0.569	0.528	-0.983888	0.00038731
Q8BW75	IPI00226140	Maob	AOFB	Amine oxidase [flavin-containing] B	0.589	0.653	0.621	0.502	0.545	0.5235	0.361	0.468	0.4145	-0.865735	0.0258305	0.751	0.804	0.7775	0.69	0.677	0.6835	0.405	0.461	0.433	-0.983828	0.000390175	GO:0003824 catalytic activity; GO:0016491 oxidoreductase activity;
Q3UW64	IPI00331262	Gne	GLCNE	bifunctional UDP-N-acetylglucosamine 2-epimerase/N-acetylmannosamine kinase isoform 2	0.644	0.616	0.63	0.553	0.553	0.553	0.361	0.397	0.379	-0.983769	0.000393053	1.022	0.982	1.002	0.977	0.976	0.9765	0.691	0.748	0.7195	-0.983661	0.000398248	GO:0004553 hydrolase activity, hydrolyzing O-glycosyl compounds; GO:0016787 hydrolase activity; GO:0003824 catalytic activity; GO:0016798 hydrolase activity, acting on glycosyl bonds;
P26443	IPI00114209	Glud1	DHE3	Glutamate dehydrogenase 1	0.673	0.662	0.6675	0.526	0.606	0.566	0.279	0.332	0.3055	-0.978586	0.000682918	0.84	0.867	0.8535	0.733	0.736	0.7345	0.407	0.486	0.4465	-0.983656	0.000398524	GO:0016638 oxidoreductase activity, acting on the CH-NH2 group of donors; GO:0004352 glutamate dehydrogenase (NAD+) activity; GO:0003824 catalytic activity; GO:0016639 oxidoreductase activity, acting on the CH-NH2 group of donors, NAD or NADP as acceptor; GO:0016491 oxidoreductase activity;
P52430	IPI00317356	Pon1	PON1	Serum paraoxonase/arylesterase 1	0.631	0.798	0.7145	0.57	0.672	0.621	0.727	0.811	0.769	0.466386	0.351145	0.953	0.939	0.946	0.947	0.848	0.8975	0.531	0.567	0.549	-0.983439	0.000409119	GO:0016787 hydrolase activity; GO:0052689 carboxylic ester hydrolase activity; GO:0004064 arylesterase activity; GO:0003824 catalytic activity; GO:0016788 hydrolase activity, acting on ester bonds;
Q8BGA8	IPI00221556	Acsm5	ACSM2	Isoform 1 of Acyl-coenzyme A synthetase ACSM5	0.917	0.914	0.9155	0.948	0.985	0.9665	0.395	0.436	0.4155	-0.965107	0.00180509	1.051	0.996	1.0235	0.902	0.829	0.8655	0.515	0.518	0.5165	-0.983155	0.000423246	GO:0003824 catalytic activity;
Q62422	IPI00125923	Ostf1	OSTF1	Osteoclast-stimulating factor 1	2.092	1.697	1.8945	2.012	1.612	1.812	1.518	1.156	1.337	-0.785841	0.0638849	1.154	1.135	1.1445	1.202	1.119	1.1605	1.677	1.638	1.6575	0.983052	0.000428402	GO:0005515 protein binding; GO:0005488 binding;
Q8R164	IPI00320462	Bphl	BPHL	Valacyclovir hydrolase	0.628	0.609	0.6185	0.637	0.645	0.641	0.501	0.529	0.515	-0.92684	0.00783286	0.952	0.939	0.9455	0.911	0.957	0.934	0.493	0.55	0.5215	-0.983023	0.0004299
P60843	IPI00118676	Eif4a1	IF4A1	Eukaryotic initiation factor 4A-I	0.696	0.652	0.674	0.608	0.641	0.6245	0.823	0.847	0.835	0.904332	0.0132907	0.912	0.85	0.881	0.885	0.838	0.8615	0.419	0.466	0.4425	-0.982797	0.000441355	GO:0005524 ATP binding; GO:1901265 nucleoside phosphate binding; GO:0001882 nucleoside binding; GO:0043167 ion binding; GO:0000166 nucleotide binding; GO:0097159 organic cyclic compound binding; GO:1901363 heterocyclic compound binding; GO:0032549 ribonucleoside binding; GO:0097367 carbohydrate derivative binding; GO:0032553 ribonucleotide binding; GO:0005488 binding; GO:0003676 nucleic acid bind…
P41317	IPI00113457	Mbl2	MBL2	Mannose-binding protein C	0.803	0.789	0.796	0.488	0.533	0.5105	0.251	0.284	0.2675	-0.919664	0.00942148	1.05	1.099	1.0745	1.055	1.093	1.074	0.469	0.495	0.482	-0.982759	0.000443323
P00329	IPI00221400	Adh1	ADH1	Alcohol dehydrogenase 1	0.603	0.572	0.5875	0.539	0.548	0.5435	0.489	0.556	0.5225	-0.667382	0.147552	0.859	0.95	0.9045	0.715	0.73	0.7225	0.347	0.331	0.339	-0.982732	0.000444716	GO:0046914 transition metal ion binding; GO:0003824 catalytic activity; GO:0005488 binding; GO:0043167 ion binding; GO:0046872 metal ion binding; GO:0043169 cation binding; GO:0008270 zinc ion binding; GO:0016491 oxidoreductase activity;
Q9QXD6	IPI00228630	Fbp1	F16P1	Fructose-1,6-bisphosphatase 1	0.683	0.652	0.6675	0.527	0.562	0.5445	0.32	0.332	0.326	-0.977234	0.000771559	0.795	0.798	0.7965	0.795	0.8	0.7975	0.513	0.539	0.526	-0.982669	0.000447934	GO:0019203 carbohydrate phosphatase activity; GO:0042578 phosphoric ester hydrolase activity; GO:0003824 catalytic activity; GO:0016791 phosphatase activity; GO:0016788 hydrolase activity, acting on ester bonds; GO:0016787 hydrolase activity; GO:0050308 sugar-phosphatase activity; GO:0042132 fructose 1,6-bisphosphate 1-phosphatase activity;
P04117	IPI00116705	Fabp4	A-FABP	Fatty acid-binding protein, adipocyte	0.937	0.835	0.886	0.661	0.685	0.673	1.587	1.599	1.593	0.919714	0.00941002	0.964	0.942	0.953	0.925	0.96	0.9425	2.475	2.615	2.545	0.98247	0.000458277	GO:0008289 lipid binding; GO:0005488 binding; GO:0005215 transporter activity;
Q3UQ44	IPI00406193	Iqgap2	IQGA2	Ras GTPase-activating-like protein	0.883	0.787	0.835	0.731	0.713	0.722	0.549	0.563	0.556	-0.942426	0.00487677	0.926	0.987	0.9565	0.83	0.809	0.8195	0.538	0.543	0.5405	-0.982213	0.000471768	GO:0005515 protein binding; GO:0005488 binding;
Q6P3A8	IPI00115302	Bckdhb	ODBB	Isoform 2 of 2-oxoisovalerate dehydrogenase subunit beta	0.477	0.492	0.4845	0.408	0.445	0.4265	0.328	0.454	0.391	-0.627589	0.18221	0.939	0.839	0.889	0.753	0.813	0.783	0.268	0.381	0.3245	-0.982172	0.00047395	GO:0003824 catalytic activity;
Q922D8	IPI00122862	Mthfd1	C1TC	C-1-tetrahydrofolate synthase	0.807	0.757	0.782	0.705	0.779	0.742	0.749	0.769	0.759	-0.135418	0.798114	0.821	0.87	0.8455	0.707	0.794	0.7505	0.414	0.463	0.4385	-0.982062	0.000479791	GO:0016645 oxidoreductase activity, acting on the CH-NH group of donors; GO:0005524 ATP binding; GO:1901265 nucleoside phosphate binding; GO:0016874 ligase activity; GO:0001882 nucleoside binding; GO:0043167 ion binding; GO:0004488 methylenetetrahydrofolate dehydrogenase (NADP+) activity; GO:0000166 nucleotide binding; GO:0016491 oxidoreductase activity; GO:0016879 ligase activity, forming carbon…
P62264	IPI00322562	Rps14	RS14	40S ribosomal protein S14	0.683	0.7	0.6915	0.646	0.691	0.6685	0.426	0.518	0.472	-0.953795	0.00315297	0.794	0.807	0.8005	0.77	0.825	0.7975	0.38	0.405	0.3925	-0.981842	0.000491559	GO:0003735 structural constituent of ribosome; GO:0005198 structural molecule activity;
Q9D3L3	IPI00113798	Snap23	SNP23	synaptosomal-associated protein 23 isoform a	1.592	1.599	1.5955	1.294	1.423	1.3585	1.524	1.738	1.631	0.389172	0.445713	1.349	1.413	1.381	1.306	1.41	1.358	0.794	0.754	0.774	-0.981698	0.00049938	GO:0005515 protein binding; GO:0005488 binding;
Q91YI0	IPI00314788	Asl	ASAL	Argininosuccinate lyase	0.824	0.758	0.791	0.648	0.572	0.61	0.254	0.282	0.268	-0.975457	0.000896135	0.89	0.848	0.869	0.86	0.887	0.8735	0.39	0.387	0.3885	-0.981607	0.000504369	GO:0016829 lyase activity; GO:0016840 carbon-nitrogen lyase activity; GO:0004056 argininosuccinate lyase activity; GO:0016842 amidine-lyase activity; GO:0003824 catalytic activity;
P08003	IPI00271951	Pdia4	PDIA4	protein disulfide-isomerase A4	0.747	0.772	0.7595	0.732	0.744	0.738	0.714	0.783	0.7485	-0.0702985	0.894726	1.016	1.039	1.0275	1.015	0.987	1.001	0.613	0.505	0.559	-0.98102	0.000536919	GO:0016864 intramolecular oxidoreductase activity, transposing S-S bonds; GO:0016860 intramolecular oxidoreductase activity; GO:0016853 isomerase activity; GO:0003756 protein disulfide isomerase activity; GO:0003824 catalytic activity;
Q9Z0X1	IPI00129577	Aifm1	AIFM1	Apoptosis-inducing factor 1	0.656	0.633	0.6445	0.543	0.528	0.5355	0.408	0.416	0.412	-0.947466	0.0040672	0.865	0.885	0.875	0.701	0.699	0.7	0.395	0.391	0.393	-0.980926	0.000542282	GO:1901265 nucleoside phosphate binding; GO:0050660 flavin adenine dinucleotide binding; GO:0046983 protein dimerization activity; GO:0043167 ion binding; GO:0005515 protein binding; GO:0000166 nucleotide binding; GO:0048037 cofactor binding; GO:0016491 oxidoreductase activity; GO:1901363 heterocyclic compound binding; GO:0097159 organic cyclic compound binding; GO:0003824 catalytic activity; GO:…
Q9CXN7	IPI00110528	3110049J23Rik	PBLD2	Phenazine biosynthesis-like domain-containing protein 2	0.705	0.67	0.6875	0.659	0.666	0.6625	0.378	0.407	0.3925	-0.990428	0.000136999	0.844	0.809	0.8265	0.744	0.778	0.761	0.594	0.612	0.603	-0.980837	0.000547291	GO:0003824 catalytic activity;
Q9D0F3	IPI00132475	Lman1	LMAN1	Putative uncharacterized protein	1	0.977	0.9885	0.837	0.93	0.8835	0.625	0.747	0.686	-0.927302	0.00773539	0.923	0.942	0.9325	0.822	0.83	0.826	0.62	0.643	0.6315	-0.980797	0.000549592
Q922R8	IPI00986015	LOC100046302	PDIA6	protein disulfide-isomerase A6-like	0.84	0.949	0.8945	0.648	0.711	0.6795	0.552	0.652	0.602	-0.764619	0.0765855	0.994	1.015	1.0045	0.844	0.876	0.86	0.418	0.546	0.482	-0.980321	0.000577068	GO:0016853 isomerase activity; GO:0003824 catalytic activity;
P48193	IPI00395157	Epb4.1	P4.1	Isoform 1 of Protein 4.1	1.336	1.308	1.322	1.451	1.385	1.418	1.374	1.59	1.482	0.632238	0.178003	1.334	1.344	1.339	1.316	1.38	1.348	2.124	2.268	2.196	0.980257	0.000580854	GO:0003779 actin binding; GO:0005515 protein binding; GO:0008092 cytoskeletal protein binding; GO:0005198 structural molecule activity; GO:0005488 binding;
Q8CAQ8	IPI00228150	Immt	MIC60	Isoform 1 of Mitochondrial inner membrane protein	0.936	0.988	0.962	1.017	0.99	1.0035	0.913	0.976	0.9445	-0.423249	0.403037	1.002	0.97	0.986	1.141	1.184	1.1625	1.473	1.552	1.5125	0.979139	0.000648263
P40142	IPI00137409	Tkt	TKT	Transketolase	0.688	0.629	0.6585	0.68	0.677	0.6785	0.542	0.368	0.455	-0.856797	0.0292923	0.865	0.9	0.8825	0.749	0.731	0.74	0.498	0.468	0.483	-0.979062	0.000652988	GO:0003824 catalytic activity;
P06801	IPI00128857	Me1	NADP-ME	NADP-dependent malic enzyme	0.728	0.808	0.768	1.584	1.711	1.6475	1.676	1.719	1.6975	0.674098	0.142011	0.871	0.868	0.8695	2.041	1.736	1.8885	3.632	3.835	3.7335	0.979008	0.000656362	GO:0004471 malate dehydrogenase (decarboxylating) (NAD+) activity; GO:1901265 nucleoside phosphate binding; GO:0000166 nucleotide binding; GO:0048037 cofactor binding; GO:0016491 oxidoreductase activity; GO:0016614 oxidoreductase activity, acting on CH-OH group of donors; GO:1901363 heterocyclic compound binding; GO:0097159 organic cyclic compound binding; GO:0016616 oxidoreductase activity, acti…
Q9D8S9	IPI00111953	Bola1	BOLA1	BolA-like protein 1	1.716	1.66	1.688	1.999	1.943	1.971	1.317	1.489	1.403	-0.74759	0.0875257	1.313	1.338	1.3255	1.306	1.428	1.367	1.849	1.949	1.899	0.97898	0.000658123
P70296	IPI00137730	Pebp1	PEBP1	Phosphatidylethanolamine-binding protein 1	1.313	1.14	1.2265	1.387	1.233	1.31	1.015	1.062	1.0385	-0.760965	0.0788777	1.905	1.917	1.911	1.915	1.873	1.894	1.551	1.455	1.503	-0.978009	0.000720092
P55264	IPI00126940	Adk	ADK	Isoform Long of Adenosine kinase	0.602	0.619	0.6105	0.618	0.575	0.5965	0.351	0.372	0.3615	-0.98433	0.000366404	0.865	0.83	0.8475	0.657	0.734	0.6955	0.268	0.377	0.3225	-0.977943	0.000724409	GO:0016301 kinase activity; GO:0019206 nucleoside kinase activity; GO:0016773 phosphotransferase activity, alcohol group as acceptor; GO:0003824 catalytic activity; GO:0019205 nucleobase-containing compound kinase activity; GO:0016740 transferase activity; GO:0004001 adenosine kinase activity; GO:0016772 transferase activity, transferring phosphorus-containing groups;
Q9CQ92	IPI00132217	Fis1	FIS1	Mitochondrial fission 1 protein	1.376	1.329	1.3525	1.29	1.412	1.351	1.814	1.768	1.791	0.966612	0.00165352	0.993	1.013	1.003	0.988	0.936	0.962	2.01	2.026	2.018	0.97794	0.000724565	GO:0005515 protein binding; GO:0005488 binding;
Q921H8	IPI00121833	Acaa1a	THIKA	3-ketoacyl-CoA thiolase A	1.144	1.039	1.0915	1.807	1.95	1.8785	3.364	3.912	3.638	0.97927	0.000640132	1.33	2.079	1.7045	1.896	1.951	1.9235	4.47	4.891	4.6805	0.977913	0.000726344	GO:0016746 transferase activity, transferring acyl groups; GO:0016747 transferase activity, transferring acyl groups other than amino-acyl groups; GO:0016740 transferase activity; GO:0003824 catalytic activity;
Q64459	IPI00134504	Cyp3a11	CYPIIIA11	Cytochrome P450 3A11	0.941	0.825	0.883	0.84	0.825	0.8325	0.637	0.634	0.6355	-0.953229	0.00323011	0.971	0.939	0.955	0.96	0.982	0.971	0.499	0.468	0.4835	-0.977646	0.000743978	GO:0097159 organic cyclic compound binding; GO:1901363 heterocyclic compound binding; GO:0020037 heme binding; GO:0005506 iron ion binding; GO:0046914 transition metal ion binding; GO:0003824 catalytic activity; GO:0005488 binding; GO:0043167 ion binding; GO:0043169 cation binding; GO:0046872 metal ion binding; GO:0016705 oxidoreductase activity, acting on paired donors, with incorporation or red…
Q91Y97	IPI00127206	Aldob	ALDOB	Fructose-bisphosphate aldolase B	0.694	0.695	0.6945	0.689	0.683	0.686	0.395	0.478	0.4365	-0.970235	0.00131573	0.89	0.914	0.902	0.848	0.83	0.839	0.423	0.554	0.4885	-0.977519	0.000752432	GO:0016829 lyase activity; GO:0004332 fructose-bisphosphate aldolase activity; GO:0016832 aldehyde-lyase activity; GO:0003824 catalytic activity; GO:0016830 carbon-carbon lyase activity;
Q8VBV7	IPI00187407	Cops8	CSN8	COP9 signalosome complex subunit 8	1.447	1.394	1.4205	1.452	1.384	1.418	1.494	1.762	1.628	0.758081	0.0807081	1.107	1.097	1.102	1.201	1.41	1.3055	2.135	2.465	2.3	0.977462	0.000756231
Q8VDK1	IPI00128873	Nit1	NIT1	Isoform 2 of Nitrilase homolog 1	0.837	0.843	0.84	0.836	0.83	0.833	0.712	0.777	0.7445	-0.911567	0.0113847	1.003	1.003	1.003	0.884	0.977	0.9305	0.615	0.682	0.6485	-0.977157	0.000776737	GO:0016787 hydrolase activity; GO:0003824 catalytic activity; GO:0016810 hydrolase activity, acting on carbon-nitrogen (but not peptide) bonds;
Q60932	IPI00122549	Vdac1	VDAC-1	Isoform Pl-VDAC1 of Voltage-dependent anion-selective channel protein 1	0.605	0.617	0.611	0.632	0.584	0.608	0.56	0.583	0.5715	-0.747599	0.0875199	0.909	0.913	0.911	0.747	0.79	0.7685	0.359	0.484	0.4215	-0.97686	0.000797019	GO:0015075 ion transmembrane transporter activity; GO:0022803 passive transmembrane transporter activity; GO:0005253 anion channel activity; GO:0022892 substrate-specific transporter activity; GO:0015267 channel activity; GO:0022891 substrate-specific transmembrane transporter activity; GO:0005244 voltage-gated ion channel activity; GO:0008308 voltage-gated anion channel activity; GO:0022838 subs…
Q9DCU9	IPI00753303	Dhdpsl	HOGA1	Probable 4-hydroxy-2-oxoglutarate aldolase	0.681	0.715	0.698	0.565	0.619	0.592	0.325	0.389	0.357	-0.974676	0.000953842	0.845	0.841	0.843	0.782	0.888	0.835	0.406	0.411	0.4085	-0.976578	0.000816483	GO:0016829 lyase activity; GO:0003824 catalytic activity;
O35490	IPI00130950	Bhmt	BHMT1	Betaine--homocysteine S-methyltransferase 1	0.702	0.684	0.693	0.54	0.54	0.54	0.28	0.345	0.3125	-0.964444	0.00187382	0.957	1.013	0.985	0.959	1.013	0.986	0.525	0.574	0.5495	-0.976552	0.000818255	GO:0008168 methyltransferase activity; GO:0046914 transition metal ion binding; GO:0003824 catalytic activity; GO:0005488 binding; GO:0008172 S-methyltransferase activity; GO:0043167 ion binding; GO:0046872 metal ion binding; GO:0043169 cation binding; GO:0016741 transferase activity, transferring one-carbon groups; GO:0008270 zinc ion binding; GO:0047150 betaine-homocysteine S-methyltransferase …
P42125	IPI00331692	Dci	ECI1	enoyl-CoA delta isomerase 1	0.913	0.946	0.9295	1.561	1.733	1.647	2.269	2.681	2.475	0.933309	0.00652317	1.119	1.057	1.088	1.996	1.905	1.9505	3.29	3.573	3.4315	0.976269	0.000838059	GO:0003824 catalytic activity;
Q8BGL3	IPI00221636	2810007J24Rik	Sulfotransferase	sulfotransferase-like protein 1	1.009	0.951	0.98	0.844	0.802	0.823	0.342	0.399	0.3705	-0.991844	9.95137e-05	0.817	0.839	0.828	0.883	0.822	0.8525	0.19	0.229	0.2095	-0.976021	0.000855614	GO:0008146 sulfotransferase activity; GO:0016782 transferase activity, transferring sulfur-containing groups; GO:0003824 catalytic activity; GO:0016740 transferase activity;
Q99N15	IPI00830581	Hsd17b10	HCD2	3-hydroxyacyl-CoA dehydrogenase type-2	0.717	0.613	0.665	0.653	0.63	0.6415	0.633	0.756	0.6945	0.338248	0.511978	0.937	0.97	0.9535	0.876	0.855	0.8655	0.577	0.431	0.504	-0.975674	0.000880416	GO:0003824 catalytic activity; GO:0016491 oxidoreductase activity;
Q9CW42	IPI00676071	Mosc1	MARC1	MOSC domain-containing protein 1	0.778	0.787	0.7825	0.748	0.826	0.787	0.571	0.687	0.629	-0.858819	0.028491	0.806	0.811	0.8085	0.833	0.799	0.816	0.496	0.534	0.515	-0.975584	0.000886905	GO:0097159 organic cyclic compound binding; GO:1901363 heterocyclic compound binding; GO:0030151 molybdenum ion binding; GO:0046914 transition metal ion binding; GO:0003824 catalytic activity; GO:0005488 binding; GO:0043167 ion binding; GO:0046872 metal ion binding; GO:0043169 cation binding; GO:0043168 anion binding; GO:0048037 cofactor binding; GO:0030170 pyridoxal phosphate binding;
Q9DBL7	IPI00322610	Coasy	COASY	Bifunctional coenzyme A synthase	0.623	0.561	0.592	0.56	0.627	0.5935	0.669	0.702	0.6855	0.831289	0.0402942	0.977	1.003	0.99	0.861	0.981	0.921	0.637	0.613	0.625	-0.974942	0.000934023	GO:0005524 ATP binding; GO:1901265 nucleoside phosphate binding; GO:0016773 phosphotransferase activity, alcohol group as acceptor; GO:0001882 nucleoside binding; GO:0043167 ion binding; GO:0000166 nucleotide binding; GO:0097159 organic cyclic compound binding; GO:1901363 heterocyclic compound binding; GO:0032549 ribonucleoside binding; GO:0097367 carbohydrate derivative binding; GO:0016301 kinas…
P14152	IPI00336324	Mdh1	MDHC	Malate dehydrogenase	0.687	0.758	0.7225	0.661	0.888	0.7745	0.499	0.669	0.584	-0.623884	0.185592	0.976	1.018	0.997	1.01	0.97	0.99	0.669	0.726	0.6975	-0.97464	0.000956527	GO:0016614 oxidoreductase activity, acting on CH-OH group of donors; GO:0016616 oxidoreductase activity, acting on the CH-OH group of donors, NAD or NADP as acceptor; GO:0016615 malate dehydrogenase activity; GO:0003824 catalytic activity; GO:0030060 L-malate dehydrogenase activity; GO:0016491 oxidoreductase activity;
Q9D0L8	IPI00317422	Rnmt	MCES	Isoform 3 of mRNA cap guanine-N7 methyltransferase	1.434	1.607	1.5205	1.247	1.438	1.3425	1.112	1.377	1.2445	-0.635645	0.174947	1.201	1.284	1.2425	1.251	1.283	1.267	1.51	1.534	1.522	0.974228	0.000987718
D3YXG3	IPI00115992	Gm4963	D3YXG3	Uncharacterized protein	2.232	2.259	2.2455	2.128	1.999	2.0635	1.739	1.755	1.747	-0.964364	0.00188229	1.016	1.016	1.016	1.064	1.093	1.0785	1.552	1.765	1.6585	0.974219	0.000988394
P05201	IPI00230204	Got1	cAspAT	Aspartate aminotransferase	0.64	0.604	0.622	0.506	0.488	0.497	0.164	0.164	0.164	-0.993812	5.73095e-05	0.995	1.074	1.0345	0.864	0.985	0.9245	0.573	0.599	0.586	-0.97421	0.000989109	GO:0097159 organic cyclic compound binding; GO:1901363 heterocyclic compound binding; GO:0016769 transferase activity, transferring nitrogenous groups; GO:0003824 catalytic activity; GO:0005488 binding; GO:0043167 ion binding; GO:0043168 anion binding; GO:0008483 transaminase activity; GO:0016740 transferase activity; GO:0048037 cofactor binding; GO:0030170 pyridoxal phosphate binding;
P51660	IPI00331628	Hsd17b4	MFE-2	Peroxisomal multifunctional enzyme type 2	0.686	0.704	0.695	0.911	0.972	0.9415	1.454	1.771	1.6125	0.968361	0.00148567	0.987	0.998	0.9925	1.251	1.248	1.2495	1.984	2.393	2.1885	0.9741	0.000997565	GO:0003824 catalytic activity; GO:0016491 oxidoreductase activity;
Q6ZWQ9	IPI00109044	2900073G15Rik	Q6ZWQ9	myosin light chain, regulatory B-like	1.737	1.623	1.68	1.015	0.99	1.0025	0.943	1.012	0.9775	-0.660883	0.153001	1.177	1.136	1.1565	1.201	1.212	1.2065	0.353	0.314	0.3335	-0.974084	0.00099876	GO:0043169 cation binding; GO:0046872 metal ion binding; GO:0005509 calcium ion binding; GO:0005488 binding; GO:0043167 ion binding;
Q61112	IPI00117754	Sdf4	CAB45	Isoform 1 of 45 kDa calcium-binding protein	1.398	1.202	1.3	0.832	0.838	0.835	0.607	0.706	0.6565	-0.802671	0.0545662	1.47	1.462	1.466	1.13	1.054	1.092	0.41	0.527	0.4685	-0.974025	0.00100329	GO:0043169 cation binding; GO:0046872 metal ion binding; GO:0005509 calcium ion binding; GO:0005488 binding; GO:0043167 ion binding;
Q3TNA1	IPI00153294	Xylb	XYLB	Xylulose kinase	0.578	0.598	0.588	0.634	0.669	0.6515	0.51	0.58	0.545	-0.609942	0.198545	1.092	1.107	1.0995	0.934	0.995	0.9645	0.493	0.651	0.572	-0.97399	0.001006	GO:0016773 phosphotransferase activity, alcohol group as acceptor; GO:0003824 catalytic activity; GO:0016740 transferase activity; GO:0016772 transferase activity, transferring phosphorus-containing groups;
Q99L47	IPI00116308	St13	F10A1	Hsc70-interacting protein	1.755	1.648	1.7015	1.533	1.504	1.5185	1.347	1.473	1.41	-0.815502	0.0479189	1.229	1.221	1.225	1.235	1.295	1.265	1.578	1.705	1.6415	0.973732	0.00102594	GO:0005515 protein binding; GO:0005488 binding;
Q61792	IPI00125091	Lasp1	LASP1	LIM and SH3 domain protein 1	1.813	1.529	1.671	1.382	1.149	1.2655	0.88	0.902	0.891	-0.883347	0.019618	1.156	1.224	1.19	1.101	1.206	1.1535	0.64	0.745	0.6925	-0.973345	0.00105627	GO:0043169 cation binding; GO:0046872 metal ion binding; GO:0005515 protein binding; GO:0008270 zinc ion binding; GO:0046914 transition metal ion binding; GO:0005488 binding; GO:0043167 ion binding;
P97328	IPI00331680	Khk	KHK	Ketohexokinase	0.756	0.66	0.708	0.721	0.667	0.694	0.369	0.41	0.3895	-0.96557	0.00175769	0.853	0.847	0.85	0.776	0.843	0.8095	0.604	0.647	0.6255	-0.973278	0.00106158	GO:0004454 ketohexokinase activity; GO:0019200 carbohydrate kinase activity; GO:0016301 kinase activity; GO:0016773 phosphotransferase activity, alcohol group as acceptor; GO:0016740 transferase activity; GO:0003824 catalytic activity; GO:0016772 transferase activity, transferring phosphorus-containing groups;
Q8QZR5	IPI00154045	Gpt	ALT1	Alanine aminotransferase 1	0.632	0.721	0.6765	0.59	0.715	0.6525	0.452	0.551	0.5015	-0.825823	0.0428646	0.865	0.975	0.92	0.801	0.883	0.842	0.359	0.476	0.4175	-0.972921	0.00109001	GO:0097159 organic cyclic compound binding; GO:1901363 heterocyclic compound binding; GO:0003824 catalytic activity; GO:0005488 binding; GO:0043167 ion binding; GO:0043168 anion binding; GO:0048037 cofactor binding; GO:0030170 pyridoxal phosphate binding;
Q9DC69	IPI00120212	Ndufa9	NDUA9-A	NADH dehydrogenase [ubiquinone] 1 alpha subcomplex subunit 9	0.479	0.495	0.487	0.412	0.456	0.434	0.241	0.28	0.2605	-0.982525	0.000455386	0.934	0.873	0.9035	0.681	0.672	0.6765	0.314	0.325	0.3195	-0.972626	0.00111374
Q61937	IPI00127415	Npm1	NPM	Nucleophosmin	1.686	1.535	1.6105	1.56	1.584	1.572	1.626	1.742	1.684	0.558122	0.249745	1.152	1.202	1.177	1.297	1.357	1.327	1.758	1.621	1.6895	0.971848	0.00117764	GO:0097159 organic cyclic compound binding; GO:1901363 heterocyclic compound binding; GO:0005488 binding; GO:0003676 nucleic acid binding;
Q6ZWV3	IPI00474637	Rpl10	RL10	60S ribosomal protein L10	0.691	0.706	0.6985	0.606	0.615	0.6105	0.544	0.659	0.6015	-0.558533	0.24932	0.721	0.721	0.721	0.692		0.692	0.388	0.444	0.416	-0.990078	0.0011847	GO:0003735 structural constituent of ribosome; GO:0005198 structural molecule activity;
Q9DBG3	IPI00119689	Ap2b1	AP2B1	Isoform 1 of AP-2 complex subunit beta	0.8	0.673	0.7365	0.638	0.468	0.553	0.707	0.595	0.651	-0.0981901	0.853188	0.975	0.86	0.9175	0.885	0.924	0.9045	0.441	0.333	0.387	-0.971133	0.00123794	GO:0022892 substrate-specific transporter activity; GO:0005515 protein binding; GO:0008565 protein transporter activity; GO:0005488 binding; GO:0005215 transporter activity;
P28653	IPI00123194	Bgn	PGS1	Biglycan	0.826	0.813	0.8195	0.504	0.498	0.501	0.448	0.466	0.457	-0.722598	0.104754	1.122	1.081	1.1015	0.812	0.802	0.807	0.358	0.381	0.3695	-0.970804	0.00126616	GO:0005515 protein binding; GO:0005488 binding;
P56135	IPI00271986	Atp5j2	ATP5J2	ATP synthase subunit f	0.343	0.579	0.461	0.329	0.478	0.4035	0.287	0.452	0.3695	-0.328822	0.524544	0.789	0.838	0.8135	0.63	0.698	0.664	0.251	0.38	0.3155	-0.970645	0.00127989
Q99L13	IPI00116222	Hibadh	3HIDH	3-hydroxyisobutyrate dehydrogenase	0.721	0.624	0.6725	0.645	0.626	0.6355	0.354	0.432	0.393	-0.958339	0.00256733	0.973	1.019	0.996	1.031	1.008	1.0195	0.416	0.513	0.4645	-0.970462	0.00129581	GO:1901265 nucleoside phosphate binding; GO:0000166 nucleotide binding; GO:0048037 cofactor binding; GO:0016491 oxidoreductase activity; GO:0016614 oxidoreductase activity, acting on CH-OH group of donors; GO:1901363 heterocyclic compound binding; GO:0097159 organic cyclic compound binding; GO:0016616 oxidoreductase activity, acting on the CH-OH group of donors, NAD or NADP as acceptor; GO:000461…
P51881	IPI00127841	Slc25a5	ADT2	ADP/ATP translocase 2	0.565	0.608	0.5865	0.463	0.537	0.5	0.517	0.576	0.5465	-0.0988498	0.852208	0.797	0.828	0.8125	0.767	0.773	0.77	0.307	0.46	0.3835	-0.970386	0.00130251	GO:0005215 transporter activity;
Q3URE1	IPI00762636	Acsf3	ACSF3	Isoform 1 of Acyl-CoA synthetase family member 3	1.074	1.228	1.151	1.266	1.108	1.187		0.965	0.965	-0.700426	0.187733	1.207	0.945	1.076	1.153	1.077	1.115	1.886	1.886	1.886	0.970085	0.00132896	GO:0003824 catalytic activity;
P08032	IPI00323230	Spna1	SPTA1	Spectrin alpha chain, erythrocyte	1.339	1.642	1.4905	1.215	1.248	1.2315	1.041	1.304	1.1725	-0.585966	0.221648	0.947	0.817	0.882	1.027	1.16	1.0935	1.68	1.537	1.6085	0.969953	0.00134066	GO:0043169 cation binding; GO:0046872 metal ion binding; GO:0005515 protein binding; GO:0005509 calcium ion binding; GO:0005488 binding; GO:0043167 ion binding;
Q8VDJ3	IPI00123379	Hdlbp	VIGLN	Vigilin	1.019	0.899	0.959	0.849	0.771	0.81	0.554	0.542	0.548	-0.953492	0.00319425	1.033	1.081	1.057	0.95	0.918	0.934	0.736	0.733	0.7345	-0.969564	0.00137543	GO:0097159 organic cyclic compound binding; GO:1901363 heterocyclic compound binding; GO:0003723 RNA binding; GO:0005488 binding; GO:0003676 nucleic acid binding;
O70591	IPI00119545	Pfdn2	PFD2	Prefoldin subunit 2	1.886	1.791	1.8385	1.885	1.946	1.9155	1.379	1.423	1.401	-0.940404	0.00522173	1.365	1.262	1.3135	1.289	1.39	1.3395	1.96	2.161	2.0605	0.969415	0.00138885	GO:0005515 protein binding; GO:0051082 unfolded protein binding; GO:0005488 binding;
Q9QXE0	IPI00316314	Hacl1	HACL1	2-hydroxyacyl-CoA lyase 1	0.619	0.634	0.6265	0.748	0.807	0.7775	0.76	0.926	0.843	0.731548	0.0984268	0.994	0.949	0.9715	1.14	1.12	1.13	1.472	1.677	1.5745	0.969385	0.00139154	GO:0000287 magnesium ion binding; GO:0019842 vitamin binding; GO:0043167 ion binding; GO:0048037 cofactor binding; GO:1901681 sulfur compound binding; GO:0030976 thiamine pyrophosphate binding; GO:1901363 heterocyclic compound binding; GO:0097159 organic cyclic compound binding; GO:0003824 catalytic activity; GO:0005488 binding; GO:0043169 cation binding; GO:0046872 metal ion binding; GO:0043168 …
Q3TFD0	IPI00454008	Shmt2	SHMT2	Serine hydroxymethyltransferase	0.809	0.735	0.772	0.81	0.768	0.789	0.545	0.595	0.57	-0.933053	0.00657277	0.893	0.946	0.9195	0.932	0.908	0.92	0.723	0.714	0.7185	-0.969203	0.00140807	GO:0097159 organic cyclic compound binding; GO:1901363 heterocyclic compound binding; GO:0003824 catalytic activity; GO:0005488 binding; GO:0043167 ion binding; GO:0004372 glycine hydroxymethyltransferase activity; GO:0016741 transferase activity, transferring one-carbon groups; GO:0043168 anion binding; GO:0016742 hydroxymethyl-, formyl- and related transferase activity; GO:0048037 cofactor bind…
Q8JZR0	IPI00170363	Acsl5	LACS5	Long-chain-fatty-acid--CoA ligase 5	0.81	0.728	0.769	1.147	1.221	1.184	1.211	1.31	1.2605	0.731816	0.09824	0.99	0.944	0.967	1.362	1.275	1.3185	1.817	1.927	1.872	0.96913	0.00141468	GO:0003824 catalytic activity;
P26883	IPI00266899	Fkbp1a	FKB1A	Peptidyl-prolyl cis-trans isomerase FKBP1A	2.071	1.978	2.0245	2.114	2.202	2.158	2.062	2.32	2.191	0.506662	0.305039	1.067	1.135	1.101	1.123	1.275	1.199	2.697	3.344	3.0205	0.968953	0.00143088
P00186	IPI00128287	Cyp1a2	CYPIA2	Cytochrome P450 1A2	0.268	0.28	0.274	0.275	0.264	0.2695	0.082	0.063	0.0725	-0.985283	0.000323292	0.799	0.764	0.7815	0.535	0.54	0.5375	0.206	0.168	0.187	-0.967792	0.00153935	GO:0097159 organic cyclic compound binding; GO:1901363 heterocyclic compound binding; GO:0020037 heme binding; GO:0005506 iron ion binding; GO:0046914 transition metal ion binding; GO:0003824 catalytic activity; GO:0005488 binding; GO:0043167 ion binding; GO:0043169 cation binding; GO:0046872 metal ion binding; GO:0016705 oxidoreductase activity, acting on paired donors, with incorporation or red…
Q99L04	IPI00331549	Dhrs1	DHRS1	Dehydrogenase/reductase SDR family member 1	0.594	0.594	0.594	0.487	0.423	0.455	0.421	0.482	0.4515	-0.614404	0.19436	1.175	1.171	1.173	0.994	0.933	0.9635	0.638	0.668	0.653	-0.967597	0.00155789
Q99LP6	IPI00117083	Grpel1	GRPE1	GrpE protein homolog 1	1.41	1.467	1.4385	1.575	1.749	1.662	1.498	1.757	1.6275	0.384314	0.45191	1.016	1.052	1.034	1.183	1.223	1.203	1.909	2.338	2.1235	0.967257	0.00159063	GO:1901265 nucleoside phosphate binding; GO:0051087 chaperone binding; GO:0060589 nucleoside-triphosphatase regulator activity; GO:0046983 protein dimerization activity; GO:0005515 protein binding; GO:0000166 nucleotide binding; GO:0098772 molecular function regulator; GO:1901363 heterocyclic compound binding; GO:0097159 organic cyclic compound binding; GO:0042802 identical protein binding; GO:00…
Q91X77	IPI00128489	Cyp2c50	CYPIIC50	Isoform 1 of Cytochrome P450 2C50	0.634	0.611	0.6225	0.435	0.518	0.4765	0.239	0.253	0.246	-0.962968	0.00203165	0.78	0.834	0.807	0.745	0.859	0.802	0.347	0.409	0.378	-0.967208	0.00159532	GO:0097159 organic cyclic compound binding; GO:1901363 heterocyclic compound binding; GO:0020037 heme binding; GO:0005506 iron ion binding; GO:0046914 transition metal ion binding; GO:0003824 catalytic activity; GO:0005488 binding; GO:0043167 ion binding; GO:0043169 cation binding; GO:0046872 metal ion binding; GO:0016705 oxidoreductase activity, acting on paired donors, with incorporation or red…
P70699	IPI00111960	Gaa	LYAG	Lysosomal alpha-glucosidase	0.861	0.895	0.878	1.14	1.278	1.209	1.349	1.697	1.523	0.863537	0.0266626	1.051	0.998	1.0245	1.101	1.166	1.1335	2.119	2.625	2.372	0.966979	0.00161757	GO:0004553 hydrolase activity, hydrolyzing O-glycosyl compounds; GO:0030246 carbohydrate binding; GO:0016787 hydrolase activity; GO:0003824 catalytic activity; GO:0005488 binding; GO:0016798 hydrolase activity, acting on glycosyl bonds;
Q8VC30	IPI00310669	Dak	DHAK	Bifunctional ATP-dependent dihydroxyacetone kinase/FAD-AMP lyase (cyclizing)	0.729	0.698	0.7135	0.626	0.653	0.6395	0.411	0.417	0.414	-0.993425	6.46988e-05	0.793	0.857	0.825	0.796	0.847	0.8215	0.451	0.526	0.4885	-0.966797	0.00163539	GO:0005524 ATP binding; GO:1901265 nucleoside phosphate binding; GO:0016773 phosphotransferase activity, alcohol group as acceptor; GO:0004371 glycerone kinase activity; GO:0001882 nucleoside binding; GO:0043167 ion binding; GO:0000166 nucleotide binding; GO:0097159 organic cyclic compound binding; GO:1901363 heterocyclic compound binding; GO:0032549 ribonucleoside binding; GO:0097367 carbohydrat…
A2ATU0	IPI00756386	Dhtkd1	DHTK1	Probable 2-oxoglutarate dehydrogenase E1 component	0.905	0.771	0.838	0.584	0.814	0.699	0.435	0.821	0.628	-0.465959	0.351645	1.545	1.711	1.628	1.169	1.373	1.271	0.463	0.647	0.555	-0.966696	0.00164527	GO:0019842 vitamin binding; GO:0043167 ion binding; GO:0016903 oxidoreductase activity, acting on the aldehyde or oxo group of donors; GO:0048037 cofactor binding; GO:1901681 sulfur compound binding; GO:0030976 thiamine pyrophosphate binding; GO:0016491 oxidoreductase activity; GO:1901363 heterocyclic compound binding; GO:0097159 organic cyclic compound binding; GO:0003824 catalytic activity; GO:…
Q99LX0	IPI00117264	Park7	PARK7	Protein DJ-1	1.161	1.244	1.2025	1.459	1.516	1.4875	0.962	1.113	1.0375	-0.635411	0.175156	1.049	0.994	1.0215	0.968	0.957	0.9625	1.612	1.627	1.6195	0.966214	0.00169291	GO:0016829 lyase activity; GO:0016836 hydro-lyase activity; GO:0036524 protein deglycase activity; GO:0003824 catalytic activity; GO:0016835 carbon-oxygen lyase activity;
Q6Y7W8	IPI00473912	Gigyf2	PERQ2	Isoform 1 of PERQ amino acid-rich with GYF domain-containing protein 2	1.672	1.635	1.6535	1.739	1.686	1.7125	1.49	1.775	1.6325	-0.212236	0.686426	1.17	1.237	1.2035	1.43	1.572	1.501	1.964	2.139	2.0515	0.966045	0.00170982	GO:0005515 protein binding; GO:0005488 binding;
P10853	IPI00114642	Hist1h2bj	H2B1F	Histone H2B type 1-F/J/L	1.358	1.313	1.3355	1.064	1.087	1.0755	0.817	0.903	0.86	-0.9095	0.0119147	0.82	0.844	0.832	0.762	0.764	0.763	1.525	1.631	1.578	0.965476	0.00176725	GO:0097159 organic cyclic compound binding; GO:1901363 heterocyclic compound binding; GO:0003677 DNA binding; GO:0046982 protein heterodimerization activity; GO:0005488 binding; GO:0046983 protein dimerization activity; GO:0003676 nucleic acid binding; GO:0005515 protein binding;
O35129	IPI00321718	Phb2	PHB2	Prohibitin-2	0.624	0.612	0.618	0.631	0.661	0.646	0.681	0.755	0.718	0.870464	0.0240825	0.929	0.906	0.9175	0.839	0.928	0.8835	0.594	0.666	0.63	-0.965123	0.00180342
P10126	IPI00307837	Eef1a1	EF1A1	Elongation factor 1-alpha 1	0.684	0.654	0.669	0.703	0.697	0.7	0.518	0.528	0.523	-0.936616	0.0058989	0.988	0.993	0.9905	0.79	0.773	0.7815	0.507	0.489	0.498	-0.964961	0.0018201	GO:0003723 RNA binding; GO:1901265 nucleoside phosphate binding; GO:0003746 translation elongation factor activity; GO:0001882 nucleoside binding; GO:0043167 ion binding; GO:0016817 hydrolase activity, acting on acid anhydrides; GO:0016787 hydrolase activity; GO:0000166 nucleotide binding; GO:0017111 nucleoside-triphosphatase activity; GO:1901363 heterocyclic compound binding; GO:0097159 organic …
O55111	IPI00115793	Dsg2	DSG2	Desmoglein-2	1.262	1.174	1.218	1.404	1.233	1.3185	1.161	1.14	1.1505	-0.536074	0.272916	1.386	1.183	1.2845	1.312	1.159	1.2355	2.264	2.238	2.251	0.964791	0.00183767	GO:0043169 cation binding; GO:0046872 metal ion binding; GO:0005509 calcium ion binding; GO:0005488 binding; GO:0043167 ion binding;
Q0P6B2	IPI00123292	Fubp1	FUBP1	Putative uncharacterized protein	1.678	1.656	1.667	1.473	1.452	1.4625	1.374	1.51	1.442	-0.65352	0.159275	1.106	1.114	1.11	1.088	1.106	1.097	1.523	1.672	1.5975	0.964235	0.00189584	GO:0097159 organic cyclic compound binding; GO:1901363 heterocyclic compound binding; GO:0003723 RNA binding; GO:0005488 binding; GO:0003676 nucleic acid binding;
Q9DCM0	IPI00113386	Ethe1	ETHE1	Protein ETHE1	0.945	0.929	0.937	0.73	0.77	0.75	0.404	0.468	0.436	-0.973451	0.00104791	0.781	0.783	0.782	0.832	0.829	0.8305	0.365	0.375	0.37	-0.963831	0.00193867
P01592	IPI00136925	Igj	IGJ	Immunoglobulin J chain	1.974	1.921	1.9475	1.02	1.094	1.057	1.07	1.22	1.145	-0.566068	0.241592	0.938	0.917	0.9275	1.18	1.151	1.1655	1.466	1.553	1.5095	0.963823	0.00193944
Q07417	IPI00116591	Acads	SCAD	Short-chain specific acyl-CoA dehydrogenase	0.646	0.643	0.6445	0.676	0.675	0.6755	0.658	0.724	0.691	0.610422	0.198093	0.897	0.931	0.914	0.954	0.957	0.9555	0.52	0.545	0.5325	-0.963762	0.00194598	GO:1901265 nucleoside phosphate binding; GO:0050660 flavin adenine dinucleotide binding; GO:0043167 ion binding; GO:0000166 nucleotide binding; GO:0048037 cofactor binding; GO:0016491 oxidoreductase activity; GO:0016627 oxidoreductase activity, acting on the CH-CH group of donors; GO:1901363 heterocyclic compound binding; GO:0097159 organic cyclic compound binding; GO:0003824 catalytic activity; …
B2RXM2	IPI00990072	Gm6793	EG627828	Uncharacterized protein	0.821	0.923	0.872	0.688	0.825	0.7565	0.611	0.821	0.716	-0.525241	0.28459	1.133	1.122	1.1275	0.908	0.977	0.9425	0.441	0.632	0.5365	-0.963667	0.00195614	GO:0097159 organic cyclic compound binding; GO:1901363 heterocyclic compound binding; GO:1901265 nucleoside phosphate binding; GO:0005488 binding; GO:0003676 nucleic acid binding; GO:0000166 nucleotide binding; GO:0036094 small molecule binding;
Q9QWG7	IPI00131365	Sult1b1	ST1B1	Isoform 1 of Sulfotransferase family cytosolic 1B member 1	0.806	0.784	0.795	0.709	0.763	0.736	0.312	0.364	0.338	-0.99241	8.6189e-05	0.924	0.971	0.9475	0.99	1.015	1.0025	0.416	0.454	0.435	-0.963411	0.00198369	GO:0008146 sulfotransferase activity; GO:0016782 transferase activity, transferring sulfur-containing groups; GO:0003824 catalytic activity; GO:0016740 transferase activity;
P01027	IPI00323624	C3	CO3	Isoform Long of Complement C3	0.716	0.769	0.7425	0.56	0.638	0.599	0.555	0.702	0.6285	-0.372424	0.467191	0.889	0.925	0.907	0.866	0.922	0.894	0.604	0.683	0.6435	-0.96292	0.00203688	GO:0030234 enzyme regulator activity; GO:0005488 binding; GO:0030414 peptidase inhibitor activity; GO:0061134 peptidase regulator activity; GO:0005515 protein binding; GO:0061135 endopeptidase regulator activity; GO:0004857 enzyme inhibitor activity; GO:0098772 molecular function regulator; GO:0004866 endopeptidase inhibitor activity;
Q6NZJ6	IPI00421179	Eif4g1	IF4G1	Isoform 1 of Eukaryotic translation initiation factor 4 gamma 1	0.962	0.988	0.975	0.819	0.868	0.8435	0.749	0.822	0.7855	-0.798316	0.0569127	0.982	0.979	0.9805	1.025	1	1.0125	0.591	0.659	0.625	-0.962627	0.00206896	GO:0097159 organic cyclic compound binding; GO:1901363 heterocyclic compound binding; GO:0003723 RNA binding; GO:0005515 protein binding; GO:0005488 binding; GO:0003676 nucleic acid binding;
P18572	IPI00113869	Bsg	BASI	Isoform 2 of Basigin	1.295	1.183	1.239	1.559	1.517	1.538	1.451	1.586	1.5185	0.557029	0.250874	1.327	1.251	1.289	1.254	1.213	1.2335	1.822	1.831	1.8265	0.962627	0.00206896	GO:0005515 protein binding; GO:0005488 binding;
Q8CI61	IPI00109089	Bag4	BAG-4	BAG family molecular chaperone regulator 4	1.727	1.753	1.74	1.619	1.62	1.6195	1.223	1.397	1.31	-0.957884	0.00262328	1.293	1.187	1.24	1.321	1.315	1.318	1.8	1.627	1.7135	0.962115	0.00212572	GO:0005515 protein binding; GO:0051087 chaperone binding; GO:0005488 binding;
Q922B1	IPI00122740	Macrod1	MACD1	MACRO domain-containing protein 1	0.995	1.001	0.998	0.97	1.021	0.9955	0.464	0.531	0.4975	-0.980502	0.000566544	1.012	1.08	1.046		0.942	0.942	0.552	0.639	0.5955	-0.98533	0.00212832
Q9DBM2	IPI00554834	Ehhadh	PBE	Peroxisomal bifunctional enzyme	1.055	1.026	1.0405	3.192	3.514	3.353	16.475	18.476	17.4755	0.995848	2.58284e-05	1.281	1.345	1.313	3.187	3.135	3.161	21.997	32.748	27.3725	0.961664	0.00217629	GO:0016614 oxidoreductase activity, acting on CH-OH group of donors; GO:0016616 oxidoreductase activity, acting on the CH-OH group of donors, NAD or NADP as acceptor; GO:0003857 3-hydroxyacyl-CoA dehydrogenase activity; GO:0003824 catalytic activity; GO:0016491 oxidoreductase activity;
Q9D826	IPI00110719	Pipox	SOX	Peroxisomal sarcosine oxidase	0.73	0.705	0.7175	0.601	0.651	0.626	0.568	0.521	0.5445	-0.888629	0.0179144	0.896	0.892	0.894	0.865	0.916	0.8905	0.623	0.695	0.659	-0.961653	0.00217759	GO:0016647 oxidoreductase activity, acting on the CH-NH group of donors, oxygen as acceptor; GO:0016645 oxidoreductase activity, acting on the CH-NH group of donors; GO:0008115 sarcosine oxidase activity; GO:0003824 catalytic activity; GO:0016491 oxidoreductase activity;
P15105	IPI00626790	Glul	GLNA	Glutamine synthetase	0.74	0.709	0.7245	0.593	0.592	0.5925	0.336	0.378	0.357	-0.977396	0.000760615	1.014	1.036	1.025	0.754	0.786	0.77	0.4	0.459	0.4295	-0.961083	0.00224233	GO:0016879 ligase activity, forming carbon-nitrogen bonds; GO:0016211 ammonia ligase activity; GO:0004356 glutamate-ammonia ligase activity; GO:0016880 acid-ammonia (or amide) ligase activity; GO:0003824 catalytic activity; GO:0016874 ligase activity;
P17717	IPI00112322	Ugt2b17	UDB17	UDP-glucuronosyltransferase 2B17	0.857	0.836	0.8465	0.83	0.831	0.8305	0.58	0.676	0.628	-0.956067	0.00285277	0.946	0.929	0.9375	0.809	0.803	0.806	0.648	0.615	0.6315	-0.960375	0.00232414	GO:0016757 transferase activity, transferring glycosyl groups; GO:0016758 transferase activity, transferring hexosyl groups; GO:0003824 catalytic activity; GO:0016740 transferase activity;
Q8VCI5	IPI00319131	Pex19	PEX19	Isoform 1 of Peroxisomal biogenesis factor 19	1.327	1.431	1.379	1.884	1.838	1.861	2.717	2.518	2.6175	0.96714	0.00160198	1.465	1.431	1.448	1.676	1.965	1.8205	2.41	2.578	2.494	0.95905	0.00248105
Q8VDC3	IPI00622780	Aco1	ACOC	Uncharacterized protein	0.67	0.689	0.6795	0.567	0.683	0.625	0.411	0.492	0.4515	-0.919174	0.00953524	0.991	0.912	0.9515	0.889	0.933	0.911	0.424	0.596	0.51	-0.958661	0.002528
Q9QYR9	IPI00136683	Acot2	MTE-I	Acyl-coenzyme A thioesterase 2	1.031	0.998	1.0145	1.93	2.138	2.034	10.672	14.356	12.514	0.975382	0.000901595	1.315	1.6	1.4575	2.179	3.059	2.619	14.445	21.659	18.052	0.957674	0.00264935	GO:0016787 hydrolase activity; GO:0016790 thiolester hydrolase activity; GO:0003824 catalytic activity; GO:0016788 hydrolase activity, acting on ester bonds;
Q9EQ20	IPI00461964	Aldh6a1	MMSDH	Methylmalonate-semialdehyde dehydrogenase [acylating]	0.638	0.57	0.604	0.643	0.623	0.633	0.418	0.399	0.4085	-0.93664	0.00589459	0.875	0.857	0.866	0.894	0.91	0.902	0.56	0.48	0.52	-0.957347	0.00269012	GO:0016620 oxidoreductase activity, acting on the aldehyde or oxo group of donors, NAD or NADP as acceptor; GO:0004491 methylmalonate-semialdehyde dehydrogenase (acylating) activity; GO:0003824 catalytic activity; GO:0016491 oxidoreductase activity; GO:0016903 oxidoreductase activity, acting on the aldehyde or oxo group of donors;
Q60902	IPI00420185	Eps15l1	EP15R	Isoform 1 of Epidermal growth factor receptor substrate 15-like 1	1.558	1.535	1.5465	1.198	1.149	1.1735	0.857	0.967	0.912	-0.891673	0.0169664	1.075	1.057	1.066	1.079	1.061	1.07	1.161	1.203	1.182	0.957075	0.00272426	GO:0043169 cation binding; GO:0046872 metal ion binding; GO:0005515 protein binding; GO:0005509 calcium ion binding; GO:0005488 binding; GO:0043167 ion binding;
O35381	IPI00314736	Anp32a	AN32A	Acidic leucine-rich nuclear phosphoprotein 32 family member A	1.505	1.378	1.4415	1.287	1.191	1.239	0.888	0.989	0.9385	-0.939719	0.00534115	1.16	1.18	1.17	1.109	1.252	1.1805	0.512	0.68	0.596	-0.956308	0.00282185	GO:0005515 protein binding; GO:0005488 binding;
Q9EP69	IPI00109221	Sacm1l	SAC1	Phosphatidylinositide phosphatase SAC1	0.707	0.639	0.673	0.607	0.509	0.558		0.554	0.554	-0.516933	0.372437	0.98	0.991	0.9855	0.888	0.78	0.834		0.405	0.405	-0.982186	0.00284659	GO:0016787 hydrolase activity; GO:0042578 phosphoric ester hydrolase activity; GO:0003824 catalytic activity; GO:0016788 hydrolase activity, acting on ester bonds;
Q9CYW4	IPI00112128	Hdhd3	HDHD3	Haloacid dehalogenase-like hydrolase domain-containing protein 3	0.607	0.525	0.566	0.5	0.432	0.466	0.384	0.302	0.343	-0.881546	0.020216	0.695	0.882	0.7885	0.6	0.766	0.683	0.192	0.26	0.226	-0.956114	0.00284674	GO:0016787 hydrolase activity; GO:0003824 catalytic activity;
Q91YQ5	IPI00309035	Rpn1	RPN1	Dolichyl-diphosphooligosaccharide--protein glycosyltransferase subunit 1	0.821	0.765	0.793	0.762	0.758	0.76	0.511	0.563	0.537	-0.98018	0.000585338	0.883	0.88	0.8815	0.715	0.749	0.732	0.515	0.561	0.538	-0.955692	0.00290137	GO:0004579 dolichyl-diphosphooligosaccharide-protein glycotransferase activity; GO:0016757 transferase activity, transferring glycosyl groups; GO:0016758 transferase activity, transferring hexosyl groups; GO:0003824 catalytic activity; GO:0016740 transferase activity; GO:0004576 oligosaccharyl transferase activity;
O55137	IPI00115871	Acot1	CTE-I	Acyl-coenzyme A thioesterase 1	0.883	0.857	0.87	2.343	2.363	2.353	5.622	7.145	6.3835	0.978711	0.000674983	1.035	1.281	1.158	2.287	2.755	2.521	9.555	14.626	12.0905	0.955494	0.00292703	GO:0016787 hydrolase activity; GO:0016790 thiolester hydrolase activity; GO:0003824 catalytic activity; GO:0016788 hydrolase activity, acting on ester bonds;
Q9CYS6	IPI00462251	2810459M11Rik	CB072	Isoform 2 of Uncharacterized protein C2orf72 homolog	1.264	1.272	1.268	0.866	0.968	0.917	0.63	0.775	0.7025	-0.862374	0.027108	1.091	1.031	1.061	0.904	0.937	0.9205	0.323	0.588	0.4555	-0.955205	0.00296501
O88451	IPI00130985	Rdh7	RDH7	Retinol dehydrogenase 7	0.599	0.405	0.502	0.517	0.333	0.425	0.489	0.432	0.4605	-0.0802279	0.879916	1.016	0.834	0.925	0.891	1.033	0.962	0.257	0.282	0.2695	-0.954734	0.00302712	GO:0003824 catalytic activity; GO:0016491 oxidoreductase activity;
P84089	IPI00403589	Gm10131	ERH	Erh Enhancer of rudimentary homolog		1.722	1.722	1.483	1.467	1.475	1.581	1.502	1.5415	-0.229319	0.710602	0.993	1.048	1.0205	1.026	1.174	1.1	1.378	1.359	1.3685	0.954581	0.00304747
Q91WT7	IPI00128376	Akr1c14	Q91WT7	Uncharacterized protein	0.707	0.708	0.7075	0.682	0.687	0.6845	0.478	0.468	0.473	-0.995979	2.42214e-05	0.808	0.854	0.831	0.62	0.665	0.6425	0.378	0.42	0.399	-0.954446	0.00306552	GO:0003824 catalytic activity; GO:0016491 oxidoreductase activity;
P56391	IPI00225390	Cox6b1	CX6B1	Cytochrome c oxidase subunit 6B1	1.671	1.35	1.5105	1.538	1.305	1.4215	1.255	1.213	1.234	-0.699749	0.121692	1.075	1.035	1.055	1.149	1.054	1.1015	0.601	0.653	0.627	-0.954222	0.00309552	GO:0015075 ion transmembrane transporter activity; GO:0022892 substrate-specific transporter activity; GO:0015077 monovalent inorganic cation transmembrane transporter activity; GO:0016676 oxidoreductase activity, acting on a heme group of donors, oxygen as acceptor; GO:0016675 oxidoreductase activity, acting on a heme group of donors; GO:0015078 hydrogen ion transmembrane transporter activity; G…
Q8R084	IPI00153143	Ugt2b1	Q8R084	Uncharacterized protein	0.757	0.766	0.7615	0.616	0.593	0.6045	0.257	0.242	0.2495	-0.990741	0.000128199	0.975	0.996	0.9855	0.702	0.715	0.7085	0.37	0.395	0.3825	-0.953541	0.00318752	GO:0016757 transferase activity, transferring glycosyl groups; GO:0016758 transferase activity, transferring hexosyl groups; GO:0003824 catalytic activity; GO:0016740 transferase activity;
Q9DBF1	IPI00230084	Aldh7a1	AL7A1	Isoform 1 of Alpha-aminoadipic semialdehyde dehydrogenase	0.796	0.716	0.756	0.606	0.615	0.6105	0.412	0.493	0.4525	-0.915363	0.010442	0.897	0.943	0.92	0.931	0.991	0.961	0.405	0.527	0.466	-0.953259	0.00322604	GO:0016620 oxidoreductase activity, acting on the aldehyde or oxo group of donors, NAD or NADP as acceptor; GO:0003824 catalytic activity; GO:0016491 oxidoreductase activity; GO:0016903 oxidoreductase activity, acting on the aldehyde or oxo group of donors;
P13634	IPI00230320	Car1	CAH1	Carbonic anhydrase 1	0.972	0.89	0.931	0.964	0.955	0.9595	1.063	1.05	1.0565	0.911421	0.011422	0.634	0.664	0.649	0.641	0.624	0.6325	0.966	1.112	1.039	0.953186	0.00323602	GO:0046914 transition metal ion binding; GO:0003824 catalytic activity; GO:0005488 binding; GO:0043167 ion binding; GO:0046872 metal ion binding; GO:0043169 cation binding; GO:0016829 lyase activity; GO:0016836 hydro-lyase activity; GO:0004089 carbonate dehydratase activity; GO:0008270 zinc ion binding; GO:0016835 carbon-oxygen lyase activity;
Q8CIM3	IPI00336850	D2hgdh	D2HDH	D-2-hydroxyglutarate dehydrogenase	0.755	0.737	0.746	0.793	0.849	0.821	0.759	0.793	0.776	0.0492691	0.926156	0.905	0.994	0.9495	0.998	1.076	1.037	0.323	0.353	0.338	-0.952565	0.00332175	GO:0097159 organic cyclic compound binding; GO:1901363 heterocyclic compound binding; GO:0016614 oxidoreductase activity, acting on CH-OH group of donors; GO:1901265 nucleoside phosphate binding; GO:0050660 flavin adenine dinucleotide binding; GO:0003824 catalytic activity; GO:0005488 binding; GO:0043167 ion binding; GO:0043168 anion binding; GO:0000166 nucleotide binding; GO:0048037 cofactor bin…
Q9JHS4	IPI00119808	Clpx	CLPX	ATP-dependent Clp protease ATP-binding subunit clpX-like	1.065	1.073	1.069	0.906	0.929	0.9175	0.491	0.517	0.504	-0.995154	3.51701e-05	0.973	0.92	0.9465	0.938	0.865	0.9015	1.298	1.315	1.3065	0.95232	0.00335592	GO:0005524 ATP binding; GO:1901265 nucleoside phosphate binding; GO:0001882 nucleoside binding; GO:0043167 ion binding; GO:0005515 protein binding; GO:0000166 nucleotide binding; GO:0097159 organic cyclic compound binding; GO:1901363 heterocyclic compound binding; GO:0032549 ribonucleoside binding; GO:0097367 carbohydrate derivative binding; GO:0032553 ribonucleotide binding; GO:0005488 binding; …
Q91X51	IPI00128425	Gorasp1	GORS1	Golgi reassembly-stacking protein 1	1.374	1.493	1.4335	1.228	1.436	1.332	1.539	1.578	1.5585	0.640994	0.170193	1.231	1.097	1.164	1.381	1.387	1.384	1.773	1.669	1.721	0.952235	0.0033678	GO:0005515 protein binding; GO:0005488 binding;
Q9QXX4	IPI00135651	Slc25a13	CMC2	Calcium-binding mitochondrial carrier protein Aralar2	0.673	0.652	0.6625	0.681	0.696	0.6885	0.397	0.43	0.4135	-0.962048	0.00213322	0.868	0.89	0.879	0.684	0.751	0.7175	0.453	0.527	0.49	-0.952132	0.00338218	GO:0043169 cation binding; GO:0046872 metal ion binding; GO:0005509 calcium ion binding; GO:0005488 binding; GO:0043167 ion binding;
P10518	IPI00112719	Alad	ALADH	Delta-aminolevulinic acid dehydratase	0.566	0.366	0.466	0.491	0.37	0.4305	0.415	0.369	0.392	-0.380984	0.456174	0.854	0.799	0.8265	0.837	0.933	0.885	0.384	0.354	0.369	-0.952107	0.00338573	GO:0003824 catalytic activity; GO:0005488 binding; GO:0043167 ion binding; GO:0043169 cation binding; GO:0046872 metal ion binding; GO:0016829 lyase activity; GO:0016836 hydro-lyase activity; GO:0004655 porphobilinogen synthase activity; GO:0016835 carbon-oxygen lyase activity;
P28665	IPI00123223	Mug1	MUG1	Murinoglobulin-1	0.695	0.745	0.72	0.524	0.655	0.5895	0.394	0.584	0.489	-0.73904	0.0932648	1.035	1.066	1.0505	0.821	0.824	0.8225	0.509	0.58	0.5445	-0.951767	0.00343354	GO:0030234 enzyme regulator activity; GO:0030414 peptidase inhibitor activity; GO:0061134 peptidase regulator activity; GO:0061135 endopeptidase regulator activity; GO:0004857 enzyme inhibitor activity; GO:0098772 molecular function regulator; GO:0004866 endopeptidase inhibitor activity;
Q91ZX7	IPI00119063	Lrp1	LRP1	Prolow-density lipoprotein receptor-related protein 1	0.893	0.879	0.886	0.684	0.786	0.735	0.593	0.702	0.6475	-0.802249	0.0547918	1.187	1.184	1.1855	0.982	1.011	0.9965	0.551	0.749	0.65	-0.951712	0.00344132	GO:0043169 cation binding; GO:0046872 metal ion binding; GO:0005515 protein binding; GO:0005509 calcium ion binding; GO:0005488 binding; GO:0043167 ion binding;
Q62159	IPI00122245	Rhoc	RHOC	Rho-related GTP-binding protein RhoC	0.793	0.769	0.781	0.676	0.621	0.6485	0.684	0.712	0.698	-0.295448	0.569723	0.937	0.902	0.9195	0.746	0.712	0.729	0.484	0.516	0.5	-0.951561	0.00346268	GO:1901265 nucleoside phosphate binding; GO:0001882 nucleoside binding; GO:0043167 ion binding; GO:0000166 nucleotide binding; GO:0097159 organic cyclic compound binding; GO:1901363 heterocyclic compound binding; GO:0032549 ribonucleoside binding; GO:0097367 carbohydrate derivative binding; GO:0032553 ribonucleotide binding; GO:0005488 binding; GO:0032550 purine ribonucleoside binding; GO:0043168…
O88986	IPI00136655	Gcat	KBL	2-amino-3-ketobutyrate coenzyme A ligase	0.51	0.684	0.597	0.479	0.585	0.532		0.326	0.326	-0.837699	0.0765504	0.986	0.813	0.8995	0.746	0.694	0.72	0.405	0.404	0.4045	-0.95105	0.00353544	GO:0008890 glycine C-acetyltransferase activity; GO:0043167 ion binding; GO:0016747 transferase activity, transferring acyl groups other than amino-acyl groups; GO:0048037 cofactor binding; GO:0016407 acetyltransferase activity; GO:0030170 pyridoxal phosphate binding; GO:1901363 heterocyclic compound binding; GO:0097159 organic cyclic compound binding; GO:0016746 transferase activity, transferrin…
Q64105	IPI00129164	Spr	SPRE	sepiapterin reductase	0.78	0.793	0.7865	0.78	0.834	0.807	0.697	0.683	0.69	-0.897391	0.0152527	1.057	0.938	0.9975	0.904	0.894	0.899	0.578	0.692	0.635	-0.950697	0.00358633	GO:0016614 oxidoreductase activity, acting on CH-OH group of donors; GO:0016616 oxidoreductase activity, acting on the CH-OH group of donors, NAD or NADP as acceptor; GO:0004757 sepiapterin reductase activity; GO:0003824 catalytic activity; GO:0016491 oxidoreductase activity;
Q8CHR6	IPI00229705	Dpyd	DPYD	Dihydropyrimidine dehydrogenase [NADP+]	0.738	0.71	0.724	0.683	0.687	0.685	0.296	0.317	0.3065	-0.994616	4.33994e-05	0.886	0.931	0.9085	0.888	0.923	0.9055	0.55	0.672	0.611	-0.950295	0.00364447	GO:0016627 oxidoreductase activity, acting on the CH-CH group of donors; GO:0003824 catalytic activity; GO:0051536 iron-sulfur cluster binding; GO:0005488 binding; GO:0051540 metal cluster binding; GO:0016491 oxidoreductase activity;
O35737	IPI00133916	Hnrnph1	HNRH1	Heterogeneous nuclear ribonucleoprotein H	0.965	0.881	0.923	0.778	0.758	0.768	0.759	0.858	0.8085	-0.370653	0.469481	1.111	1.08	1.0955	1.046	1.234	1.14	1.474	1.557	1.5155	0.950034	0.0036826	GO:0097159 organic cyclic compound binding; GO:1901363 heterocyclic compound binding; GO:1901265 nucleoside phosphate binding; GO:0005488 binding; GO:0003676 nucleic acid binding; GO:0000166 nucleotide binding; GO:0036094 small molecule binding;
Q8VCT4	IPI00387289	Ces3	CES1D	Carboxylesterase 3	0.611	0.603	0.607	0.751	0.801	0.776	0.764	0.854	0.809	0.711864	0.112573	0.944	0.929	0.9365	0.93	0.979	0.9545	0.778	0.766	0.772	-0.9495	0.00376094
Q60876	IPI00318938	Eif4ebp1	4EBP1	Eukaryotic translation initiation factor 4E-binding protein 1	0.843		0.843	0.89		0.89	1.157		1.157	0.999416	0.0217624	1.155	1.307	1.231	1.299	1.327	1.313	2.016	2.498	2.257	0.949203	0.00380489	GO:0008190 eukaryotic initiation factor 4E binding; GO:0005515 protein binding; GO:0005488 binding; GO:0031369 translation initiation factor binding;
Q8K4Z5	IPI00408796	Sf3a1	SF3A1	Splicing factor 3A subunit 1	0.978	0.915	0.9465	0.664	0.67	0.667	0.805	0.845	0.825	-0.0962788	0.856028	1.156	1.141	1.1485	1.291	1.305	1.298	0.36	0.362	0.361	-0.948368	0.00393002	GO:0097159 organic cyclic compound binding; GO:1901363 heterocyclic compound binding; GO:0003723 RNA binding; GO:0005515 protein binding; GO:0005488 binding; GO:0003676 nucleic acid binding;
O88833	IPI00322218	Cyp4a10	CYPIVA10—C	Cytochrome P450 4A10	0.71	0.713	0.7115	1.007	1.102	1.0545	2.138	2.559	2.3485	0.984388	0.0003637	1.605	1.766	1.6855	2.375	2.741	2.558	3.796	4.811	4.3035	0.948328	0.00393597	GO:0097159 organic cyclic compound binding; GO:1901363 heterocyclic compound binding; GO:0020037 heme binding; GO:0005506 iron ion binding; GO:0046914 transition metal ion binding; GO:0003824 catalytic activity; GO:0005488 binding; GO:0043167 ion binding; GO:0043169 cation binding; GO:0046872 metal ion binding; GO:0016705 oxidoreductase activity, acting on paired donors, with incorporation or red…
P70441	IPI00109311	Slc9a3r1	NHRF1	Isoform 1 of Na(+)/H(+) exchange regulatory cofactor NHE-RF1	1.817	1.892	1.8545	1.423	1.534	1.4785	0.899	0.914	0.9065	-0.968531	0.00146985	1.147	1.301	1.224	1.113	1.173	1.143	0.862	0.901	0.8815	-0.946666	0.00419086	GO:0032947 protein complex scaffold; GO:0005515 protein binding; GO:0005198 structural molecule activity; GO:0005488 binding;
Q9DCB8	IPI00120671	Isca2	ISCA2	Iron-sulfur cluster assembly 2 homolog	1.704	1.588	1.646	1.657	1.783	1.72	1.382	1.509	1.4455	-0.800301	0.0558374	1.182	1.135	1.1585	1.272	1.285	1.2785	1.474	1.658	1.566	0.945511	0.00437268	GO:0005198 structural molecule activity; GO:0051536 iron-sulfur cluster binding; GO:0005488 binding; GO:0051540 metal cluster binding;
Q9CQE8	IPI00132456	2700060E02Rik	CN166	UPF0568 protein C14orf166 homolog	1.635	1.731	1.683	1.484	1.702	1.593	1.276	1.462	1.369	-0.829379	0.0411836	1.293	1.29	1.2915	1.1	1.138	1.119	0.742	0.916	0.829	-0.94543	0.00438564
Q91W43	IPI00127267	Gldc	GCSP	Glycine dehydrogenase [decarboxylating]	0.783	0.845	0.814	0.723	0.779	0.751	0.367	0.374	0.3705	-0.991592	0.000105752	0.903	0.924	0.9135	0.719	0.693	0.706	0.47	0.491	0.4805	-0.945303	0.00440584	GO:0016829 lyase activity; GO:0016638 oxidoreductase activity, acting on the CH-NH2 group of donors; GO:0016642 oxidoreductase activity, acting on the CH-NH2 group of donors, disulfide as acceptor; GO:0003824 catalytic activity; GO:0004375 glycine dehydrogenase (decarboxylating) activity; GO:0016491 oxidoreductase activity;
Q9CQN1	IPI00132762	Trap1	TRAP1	Heat shock protein 75 kDa	0.773	0.684	0.7285	0.683	0.603	0.643	0.692	0.713	0.7025	0.0350359	0.947468	0.915	0.891	0.903	0.904	0.817	0.8605	0.697	0.598	0.6475	-0.944898	0.00447075	GO:0005524 ATP binding; GO:1901265 nucleoside phosphate binding; GO:0001882 nucleoside binding; GO:0043167 ion binding; GO:0005515 protein binding; GO:0000166 nucleotide binding; GO:0097159 organic cyclic compound binding; GO:1901363 heterocyclic compound binding; GO:0032549 ribonucleoside binding; GO:0097367 carbohydrate derivative binding; GO:0032553 ribonucleotide binding; GO:0005488 binding; …
O88533	IPI00131814	Ddc	DDC	Aromatic-L-amino-acid decarboxylase	0.666	0.686	0.676	0.5	0.617	0.5585	0.479	0.475	0.477	-0.828556	0.0415698	0.941	0.989	0.965	0.918	0.902	0.91	0.301	0.573	0.437	-0.944721	0.00449915	GO:0097159 organic cyclic compound binding; GO:1901363 heterocyclic compound binding; GO:0003824 catalytic activity; GO:0005488 binding; GO:0016830 carbon-carbon lyase activity; GO:0043167 ion binding; GO:0016831 carboxy-lyase activity; GO:0016829 lyase activity; GO:0043168 anion binding; GO:0048037 cofactor binding; GO:0030170 pyridoxal phosphate binding;
Q9D3D9	IPI00453777	Atp5d	ATPD	ATP synthase subunit delta	1.978	1.936	1.957	2.126	2.209	2.1675	1.528	1.555	1.5415	-0.867682	0.0251037	1.411	1.335	1.373	1.393	1.363	1.378	1.647	1.799	1.723	0.944382	0.00455399	GO:0022804 active transmembrane transporter activity; GO:0042625 ATPase coupled ion transmembrane transporter activity; GO:0015075 ion transmembrane transporter activity; GO:0022853 active ion transmembrane transporter activity; GO:0015399 primary active transmembrane transporter activity; GO:0022892 substrate-specific transporter activity; GO:0044769 ATPase activity, coupled to transmembrane mov…
Q91WE2	IPI00331260	Fam192a	F192A	Protein FAM192A	1.542	1.629	1.5855	1.525	1.67	1.5975	1.481	1.677	1.579	-0.0660152	0.901121	1.127	1.103	1.115	1.181	1.206	1.1935	1.344	1.49	1.417	0.944169	0.00458861
Q9CWJ9	IPI00330303	Atic	PUR9	Bifunctional purine biosynthesis protein PURH	0.776	0.733	0.7545	0.696	0.708	0.702	0.524	0.741	0.6325	-0.593372	0.214402	0.921	0.922	0.9215	0.838	0.908	0.873	0.75	0.775	0.7625	-0.943846	0.00464139	GO:0016814 hydrolase activity, acting on carbon-nitrogen (but not peptide) bonds, in cyclic amidines; GO:0004643 phosphoribosylaminoimidazolecarboxamide formyltransferase activity; GO:0003824 catalytic activity; GO:0016741 transferase activity, transferring one-carbon groups; GO:0016787 hydrolase activity; GO:0019238 cyclohydrolase activity; GO:0016742 hydroxymethyl-, formyl- and related transfer…
Q64FW2	IPI00471380	Retsat	RETST	All-trans-retinol 13,14-reductase	0.64	0.61	0.625	0.717	0.718	0.7175	0.839	0.882	0.8605	0.962657	0.00206567	1.062	1.007	1.0345	1.128	1.039	1.0835	0.7	0.693	0.6965	-0.943771	0.00465374	GO:0003824 catalytic activity; GO:0016491 oxidoreductase activity;
P19157	IPI00555023	Gstp1	GSTP1	Glutathione S-transferase P 1	1.565	1.575	1.57	1.308	1.374	1.341	1.628	1.912	1.77	0.668043	0.147003	0.817	0.827	0.822	0.624	0.657	0.6405	0.421	0.462	0.4415	-0.943417	0.0047118	GO:0004364 glutathione transferase activity; GO:0016765 transferase activity, transferring alkyl or aryl (other than methyl) groups; GO:0005515 protein binding; GO:0003824 catalytic activity; GO:0016740 transferase activity; GO:0005488 binding;
O35423	IPI00314909	Agxt	SPYA	serine--pyruvate aminotransferase	0.444	0.446	0.445	0.385	0.36	0.3725	0.262	0.292	0.277	-0.950705	0.00358513	1.097	1.032	1.0645	0.743	0.76	0.7515	0.449	0.34	0.3945	-0.943067	0.00476977	GO:0003824 catalytic activity;
Q78JT3	IPI00408961	Haao	3HAO	3-hydroxyanthranilate 3,4-dioxygenase	0.861	0.783	0.822	0.831	0.803	0.817	0.31	0.378	0.344	-0.977267	0.000769332	0.77	0.689	0.7295	0.77	0.743	0.7565	0.504	0.489	0.4965	-0.942884	0.00480018	GO:0016702 oxidoreductase activity, acting on single donors with incorporation of molecular oxygen, incorporation of two atoms of oxygen; GO:0005506 iron ion binding; GO:0016701 oxidoreductase activity, acting on single donors with incorporation of molecular oxygen; GO:0046914 transition metal ion binding; GO:0003824 catalytic activity; GO:0051213 dioxygenase activity; GO:0005488 binding; GO:0043…
O88951	IPI00136496	Lin7b	LIN7B	Protein lin-7 homolog B	1.604	1.555	1.5795	1.323	1.31	1.3165	1.473	1.604	1.5385	0.191913	0.715665	1.231	1.189	1.21	1.273	1.235	1.254	0.94	0.974	0.957	-0.942055	0.0049391	GO:0005515 protein binding; GO:0005488 binding;
P62717	IPI00162790	Rpl18a	RL18A	60S ribosomal protein L18a		0.512	0.512	0.272	0.33	0.301	0.324	0.357	0.3405	-0.329653	0.588004		0.856	0.856		0.817	0.817	0.217	0.241	0.229	-0.994942	0.00505758	GO:0003735 structural constituent of ribosome; GO:0005198 structural molecule activity;
Q9DBA8	IPI00119470	Amdhd1	HUTI	Probable imidazolonepropionase	0.636	0.665	0.6505	0.611	0.536	0.5735	0.227	0.271	0.249	-0.988598	0.00019428	0.904	0.926	0.915	0.675	0.653	0.664	0.376	0.425	0.4005	-0.941033	0.00511318	GO:0016812 hydrolase activity, acting on carbon-nitrogen (but not peptide) bonds, in cyclic amides; GO:0016787 hydrolase activity; GO:0003824 catalytic activity; GO:0016810 hydrolase activity, acting on carbon-nitrogen (but not peptide) bonds;
Q3UMU9	IPI00116442	Hdgfrp2	HDGR2	Isoform 3 of Hepatoma-derived growth factor-related protein 2	1.535	1.598	1.5665	1.528	1.718	1.623	1.13	1.24	1.185	-0.906921	0.0125925	1.263	1.13	1.1965	1.245	1.063	1.154	1.718	1.711	1.7145	0.940747	0.00516239
Q9Z239	IPI00130455	Fxyd1	PLM	Phospholemman	0.768	0.731	0.7495	0.573	0.578	0.5755	0.536	0.567	0.5515	-0.71415	0.110887	1.199	1.171	1.185	0.772	0.774	0.773	0.327	0.379	0.353	-0.940007	0.00529071	GO:0015075 ion transmembrane transporter activity; GO:0022838 substrate-specific channel activity; GO:0022803 passive transmembrane transporter activity; GO:0022892 substrate-specific transporter activity; GO:0005216 ion channel activity; GO:0015267 channel activity; GO:0022891 substrate-specific transmembrane transporter activity; GO:0022857 transmembrane transporter activity; GO:0005215 transpo…
Q9DC50	IPI00120165	Crot	COT	Peroxisomal carnitine O-octanoyltransferase	0.541	0.476	0.5085	0.482	0.428	0.455	1.196	1.338	1.267	0.96518	0.00179754	0.923	0.908	0.9155	0.807	0.834	0.8205	1.323	1.38	1.3515	0.939035	0.00546178	GO:0016746 transferase activity, transferring acyl groups; GO:0003824 catalytic activity; GO:0016740 transferase activity;
P50427	IPI00118038	Sts	STS	Steryl-sulfatase	0.682	0.649	0.6655	0.586	0.563	0.5745	0.86	0.903	0.8815	0.88564	0.0188694	1.191	1.085	1.138	0.818	0.864	0.841	0.509	0.528	0.5185	-0.938843	0.00549584	GO:0016787 hydrolase activity; GO:0008484 sulfuric ester hydrolase activity; GO:0003824 catalytic activity; GO:0016788 hydrolase activity, acting on ester bonds;
P97823	IPI00130018	Lypla1	LYPA1	Isoform 1 of Acyl-protein thioesterase 1	0.693	0.681	0.687	0.681	0.702	0.6915	0.602	0.599	0.6005	-0.962992	0.002029	1.019	0.952	0.9855	1.132	1.013	1.0725	0.512	0.496	0.504	-0.938751	0.00551227	GO:0016787 hydrolase activity; GO:0003824 catalytic activity;
P11087	IPI00329872	Col1a1	CO1A1	Isoform 1 of Collagen alpha-1(I) chain	1.174	1.284	1.229	0.6	0.7	0.65	0.409	0.538	0.4735	-0.78485	0.0644547	1.403	1.405	1.404	1.561	1.584	1.5725	0.553	0.688	0.6205	-0.938502	0.00555677	GO:0005201 extracellular matrix structural constituent; GO:0005515 protein binding; GO:0005198 structural molecule activity; GO:0005488 binding;
Q8K310	IPI00453826	Matr3	MATR3	Matrin-3	1.15	1.171	1.1605	0.967	1.044	1.0055	0.854	0.993	0.9235	-0.782343	0.0659062	1.172	1.239	1.2055	1.151	1.239	1.195	1.48	1.609	1.5445	0.938211	0.00560895	GO:0097159 organic cyclic compound binding; GO:1901363 heterocyclic compound binding; GO:1901265 nucleoside phosphate binding; GO:0046914 transition metal ion binding; GO:0005488 binding; GO:0003676 nucleic acid binding; GO:0043167 ion binding; GO:0046872 metal ion binding; GO:0043169 cation binding; GO:0000166 nucleotide binding; GO:0008270 zinc ion binding; GO:0036094 small molecule binding;
P11404	IPI00230124	Fabp3	H-FABP	Fatty acid-binding protein, heart	1.133	1.254	1.1935	1.599	2.434	2.0165	16.284	24.231	20.2575	0.95848	0.0025501	1.141	1.414	1.2775	0.799	1.113	0.956	10.909	17.45	14.1795	0.937853	0.00567344	GO:0008289 lipid binding; GO:0005488 binding; GO:0005215 transporter activity;
Q9CZ13	IPI00111885	Uqcrc1	QCR1	Cytochrome b-c1 complex subunit 1	0.852	0.763	0.8075	0.881	0.802	0.8415	0.617	0.658	0.6375	-0.876325	0.0219975	1.025	0.94	0.9825	0.964	0.97	0.967	0.789	0.833	0.811	-0.937706	0.00570004	GO:0046872 metal ion binding; GO:0043169 cation binding; GO:0003824 catalytic activity; GO:0005488 binding; GO:0043167 ion binding;
Q6NVF9	IPI00421085	Cpsf6	CPSF6	Cleavage and polyadenylation specificity factor subunit 6	1.501	1.493	1.497	1.255	1.225	1.24	1.023	0.985	1.004	-0.928288	0.00752955	1.207	1.04	1.1235	1.12	1.01	1.065	1.61	1.608	1.609	0.937453	0.00574589	GO:0097159 organic cyclic compound binding; GO:1901363 heterocyclic compound binding; GO:1901265 nucleoside phosphate binding; GO:0005488 binding; GO:0003676 nucleic acid binding; GO:0000166 nucleotide binding; GO:0036094 small molecule binding;
P81117	IPI00309704	Nucb2	NUCB2	Nucleobindin-2	1.945	1.879	1.912	1.022	1.103	1.0625	0.992	1.026	1.009	-0.679511	0.137611	0.923	0.884	0.9035	0.913	0.873	0.893	1.194	1.089	1.1415	0.936836	0.0058586	GO:0043169 cation binding; GO:0046872 metal ion binding; GO:0005509 calcium ion binding; GO:0005488 binding; GO:0043167 ion binding;
Q9QYG0	IPI00136134	Ndrg2	NDRG2	Isoform 1 of Protein NDRG2	1.009	0.965	0.987	0.975	0.906	0.9405	0.813	0.852	0.8325	-0.919924	0.00936151	1.506	1.498	1.502	1.014	1.1	1.057	0.585	0.635	0.61	-0.936818	0.00586182
Q91XD4	IPI00129011	Ftcd	FTCD	Formimidoyltransferase-cyclodeaminase	0.728	0.817	0.7725	0.823	0.947	0.885	0.62	0.701	0.6605	-0.672765	0.143103	1.001	0.958	0.9795	0.905	0.941	0.923	0.677	0.798	0.7375	-0.935866	0.00603792	GO:0097159 organic cyclic compound binding; GO:1901363 heterocyclic compound binding; GO:0019842 vitamin binding; GO:0031406 carboxylic acid binding; GO:0072341 modified amino acid binding; GO:0003824 catalytic activity; GO:0005488 binding; GO:0043167 ion binding; GO:0005542 folic acid binding; GO:0043177 organic acid binding; GO:0043168 anion binding; GO:0033218 amide binding; GO:0016740 transfe…
P16858	IPI00273646	Gapdh	G3P	Glyceraldehyde-3-phosphate dehydrogenase	0.722	0.683	0.7025	0.699	0.649	0.674	0.559	0.592	0.5755	-0.934182	0.00635549	0.843	0.802	0.8225	0.88	0.831	0.8555	0.619	0.64	0.6295	-0.935075	0.00618611	GO:0016620 oxidoreductase activity, acting on the aldehyde or oxo group of donors, NAD or NADP as acceptor; GO:0097159 organic cyclic compound binding; GO:1901363 heterocyclic compound binding; GO:1901265 nucleoside phosphate binding; GO:0051287 NAD binding; GO:0003824 catalytic activity; GO:0005488 binding; GO:0016903 oxidoreductase activity, acting on the aldehyde or oxo group of donors; GO:005…
O54962	IPI00119959	Banf1	BAF	Barrier-to-autointegration factor	1.347	1.488	1.4175	1.415	1.532	1.4735	1.679	2.054	1.8665	0.854845	0.0300758	1.07	1.152	1.111	1.006	1.092	1.049	1.71	2.063	1.8865	0.934861	0.00622647	GO:0097159 organic cyclic compound binding; GO:1901363 heterocyclic compound binding; GO:0003677 DNA binding; GO:0005488 binding; GO:0003676 nucleic acid binding;
Q64310	IPI00133249	Surf4	SURF4	Surfeit locus protein 4	0.663	0.634	0.6485	0.443	0.49	0.4665	0.487	0.569	0.528	-0.328179	0.525404	0.752	0.909	0.8305	0.646	0.694	0.67	0.448	0.332	0.39	-0.934728	0.00625162
Q9JLV1	IPI00331334	Bag3	BAG-3	BAG family molecular chaperone regulator 3	1.895	1.759	1.827	1.888	1.903	1.8955	1.486	1.706	1.596	-0.797661	0.0572695	1.533	1.468	1.5005	1.425	1.431	1.428	1.946	1.837	1.8915	0.93441	0.00631199	GO:0005515 protein binding; GO:0051087 chaperone binding; GO:0005488 binding;
P16015	IPI00221890	Car3	CAH3	Carbonic anhydrase 3	0.862	0.853	0.8575	0.764	0.815	0.7895	0.174	0.182	0.178	-0.995387	3.18723e-05	0.602	0.616	0.609	0.702	0.728	0.715	0.179	0.189	0.184	-0.934071	0.00637658	GO:0046914 transition metal ion binding; GO:0003824 catalytic activity; GO:0005488 binding; GO:0043167 ion binding; GO:0046872 metal ion binding; GO:0043169 cation binding; GO:0016829 lyase activity; GO:0016836 hydro-lyase activity; GO:0004089 carbonate dehydratase activity; GO:0008270 zinc ion binding; GO:0016835 carbon-oxygen lyase activity;
	IPI00985596	LOC100503164		hemoglobin subunit beta-1-like isoform 5	1.274	1.356	1.315	1.192	1.369	1.2805	1.683	2.037	1.86	0.892071	0.0168443	0.764	0.842	0.803	0.905	0.98	0.9425	1.167	1.395	1.281	0.93385	0.00641905	GO:0097159 organic cyclic compound binding; GO:1901363 heterocyclic compound binding; GO:0020037 heme binding; GO:0005506 iron ion binding; GO:0046914 transition metal ion binding; GO:0019825 oxygen binding; GO:0005488 binding; GO:0043167 ion binding; GO:0046872 metal ion binding; GO:0043169 cation binding; GO:0046906 tetrapyrrole binding;
P53996	IPI00137229	Cnbp	CNBP	Isoform 2 of Cellular nucleic acid-binding protein	2.39	2.146	2.268	2.919	2.795	2.857	1.942	1.959	1.9505	-0.632295	0.177952	1.237	1.208	1.2225	1.009	0.948	0.9785	2.16	2.301	2.2305	0.933278	0.00652916	GO:0097159 organic cyclic compound binding; GO:1901363 heterocyclic compound binding; GO:0046914 transition metal ion binding; GO:0005488 binding; GO:0003676 nucleic acid binding; GO:0043167 ion binding; GO:0046872 metal ion binding; GO:0043169 cation binding; GO:0008270 zinc ion binding;
P36552	IPI00400301	Cpox	HEM6	Coproporphyrinogen-III oxidase	0.905	0.902	0.9035	0.799	0.768	0.7835	0.877	1.008	0.9425	0.480797	0.334377	0.935	0.952	0.9435	1.019	1.006	1.0125	0.597	0.67	0.6335	-0.932785	0.00662487	GO:0016627 oxidoreductase activity, acting on the CH-CH group of donors; GO:0016634 oxidoreductase activity, acting on the CH-CH group of donors, oxygen as acceptor; GO:0004109 coproporphyrinogen oxidase activity; GO:0003824 catalytic activity; GO:0016491 oxidoreductase activity;
Q9D1K2	IPI00315999	Atp6v1f	VATF	V-type proton ATPase subunit F	1.8	1.827	1.8135	1.488	1.666	1.577	1.374	1.456	1.415	-0.846959	0.0333402	1.095	1.107	1.101	1.026	1.015	1.0205	1.834	2.317	2.0755	0.932207	0.00673802	GO:0022804 active transmembrane transporter activity; GO:0042625 ATPase coupled ion transmembrane transporter activity; GO:0015075 ion transmembrane transporter activity; GO:0022853 active ion transmembrane transporter activity; GO:0015399 primary active transmembrane transporter activity; GO:0022892 substrate-specific transporter activity; GO:0044769 ATPase activity, coupled to transmembrane mov…
P49429	IPI00554931	Hpd	HPPD	4-hydroxyphenylpyruvate dioxygenase	0.729	0.654	0.6915	0.654	0.626	0.64	0.31	0.313	0.3115	-0.989544	0.000163426	0.822	0.911	0.8665	0.925	0.94	0.9325	0.541	0.565	0.553	-0.93152	0.00687368	GO:0016702 oxidoreductase activity, acting on single donors with incorporation of molecular oxygen, incorporation of two atoms of oxygen; GO:0003868 4-hydroxyphenylpyruvate dioxygenase activity; GO:0016701 oxidoreductase activity, acting on single donors with incorporation of molecular oxygen; GO:0003824 catalytic activity; GO:0051213 dioxygenase activity; GO:0016491 oxidoreductase activity;
Q9Z2V4	IPI00131438	Pck1	PEPCK-C	Phosphoenolpyruvate carboxykinase	0.725	0.759	0.742	0.547	0.561	0.554	0.562	0.611	0.5865	-0.498023	0.314728	1.25	1.199	1.2245	0.925	0.866	0.8955	0.587	0.574	0.5805	-0.93142	0.00689363	GO:1901265 nucleoside phosphate binding; GO:0004611 phosphoenolpyruvate carboxykinase activity; GO:0001882 nucleoside binding; GO:0043167 ion binding; GO:0016829 lyase activity; GO:0000166 nucleotide binding; GO:0097159 organic cyclic compound binding; GO:1901363 heterocyclic compound binding; GO:0032549 ribonucleoside binding; GO:0097367 carbohydrate derivative binding; GO:0003824 catalytic acti…
Q8BH43	IPI00221723	Wasf2	WASF2	Wiskott-Aldrich syndrome protein family member 2	1.925	1.84	1.8825	1.54	1.464	1.502	0.967	1.109	1.038	-0.946425	0.0042286	1.152	1.15	1.151	1.088	1.084	1.086	1.402	1.393	1.3975	0.931209	0.00693546	GO:0003779 actin binding; GO:0005515 protein binding; GO:0008092 cytoskeletal protein binding; GO:0005488 binding;
P19783	IPI00117978	Cox4i1	COX41	Cytochrome c oxidase subunit 4 isoform 1	0.797	0.777	0.787	0.807	0.81	0.8085	0.535	0.568	0.5515	-0.96476	0.00184086	0.776	0.806	0.791	0.855	0.897	0.876	0.458	0.456	0.457	-0.930439	0.00708972	GO:0015075 ion transmembrane transporter activity; GO:0022892 substrate-specific transporter activity; GO:0015077 monovalent inorganic cation transmembrane transporter activity; GO:0016676 oxidoreductase activity, acting on a heme group of donors, oxygen as acceptor; GO:0016675 oxidoreductase activity, acting on a heme group of donors; GO:0015078 hydrogen ion transmembrane transporter activity; G…
P62962	IPI00224740	Pfn1	PROF1	Profilin-1	0.686	0.738	0.712	0.648	0.617	0.6325	0.463	0.579	0.521	-0.871911	0.0235594	0.843	0.867	0.855	0.771	0.756	0.7635	0.609	0.682	0.6455	-0.930037	0.00717095	GO:0003779 actin binding; GO:0005515 protein binding; GO:0008092 cytoskeletal protein binding; GO:0005488 binding;
Q8BH00	IPI00267407	Aldh8a1	AL8A1	Aldehyde dehydrogenase family 8 member A1	0.602	0.566	0.584	0.521	0.546	0.5335	0.349	0.305	0.327	-0.987161	0.000246201	0.967	1.002	0.9845	0.67	0.73	0.7	0.371	0.462	0.4165	-0.92956	0.00726799	GO:0016620 oxidoreductase activity, acting on the aldehyde or oxo group of donors, NAD or NADP as acceptor; GO:0003824 catalytic activity; GO:0016491 oxidoreductase activity; GO:0016903 oxidoreductase activity, acting on the aldehyde or oxo group of donors;
P62897	IPI00222419	Cycs	CYC—A	Gm10053 Cytochrome c	1.975	1.687	1.831	2.034	1.841	1.9375	2.307	2.395	2.351	0.908147	0.0122679	1.117	1.139	1.128	1.333	1.395	1.364	1.668	1.56	1.614	0.929283	0.00732453	GO:0097159 organic cyclic compound binding; GO:1901363 heterocyclic compound binding; GO:0009055 electron carrier activity; GO:0020037 heme binding; GO:0046906 tetrapyrrole binding; GO:0005488 binding;
Q8VCC2	IPI00115867	Ces1	EST1	Liver carboxylesterase 1	0.623	0.565	0.594	0.639	0.582	0.6105	0.423	0.472	0.4475	-0.903793	0.0134385	0.977	0.958	0.9675	0.886	0.827	0.8565	0.737	0.617	0.677	-0.928953	0.00739226
Q8K3J1	IPI00170093	Ndufs8	NDUS8	NADH dehydrogenase [ubiquinone] iron-sulfur protein 8	1.082	1.112	1.097	0.986	0.955	0.9705	0.743	0.877	0.81	-0.907718	0.012381	0.941	1.049	0.995	1.071	1.104	1.0875	0.564	0.605	0.5845	-0.928777	0.00742853	GO:0016651 oxidoreductase activity, acting on NAD(P)H; GO:0003824 catalytic activity; GO:0005488 binding; GO:0051536 iron-sulfur cluster binding; GO:0051539 4 iron, 4 sulfur cluster binding; GO:0016491 oxidoreductase activity; GO:0051540 metal cluster binding;
P14246	IPI00311809	Slc2a2	GTR2	Solute carrier family 2, facilitated glucose transporter member 2	0.611	0.602	0.6065	0.488	0.509	0.4985	0.119	0.149	0.134	-0.997475	9.55862e-06	0.757	0.787	0.772	0.467	0.469	0.468	0.172	0.209	0.1905	-0.928395	0.00750729	GO:0005355 glucose transmembrane transporter activity; GO:0015144 carbohydrate transmembrane transporter activity; GO:0051119 sugar transmembrane transporter activity; GO:1901476 carbohydrate transporter activity; GO:0015149 hexose transmembrane transporter activity; GO:0022892 substrate-specific transporter activity; GO:0015145 monosaccharide transmembrane transporter activity; GO:0022891 substr…
Q8CG76	IPI00331490	Akr7a5	ARK72	Aflatoxin B1 aldehyde reductase member 2	0.704	0.626	0.665	0.696	0.634	0.665	0.597	0.574	0.5855	-0.773787	0.0709708	1.057	1.044	1.0505	1.04	0.886	0.963	0.739	0.556	0.6475	-0.928082	0.00757225
Q8CGC7	IPI00339916	Eprs	SYEP	Bifunctional aminoacyl-tRNA synthetase	1.004	0.878	0.941	0.877	0.881	0.879	0.643	0.927	0.785	-0.565985	0.241676	0.992	1.023	1.0075	0.877	1.007	0.942	0.745	0.59	0.6675	-0.928077	0.00757334	GO:0016876 ligase activity, forming aminoacyl-tRNA and related compounds; GO:0005524 ATP binding; GO:1901265 nucleoside phosphate binding; GO:0016875 ligase activity, forming carbon-oxygen bonds; GO:0004818 glutamate-tRNA ligase activity; GO:0001882 nucleoside binding; GO:0043167 ion binding; GO:0016874 ligase activity; GO:0000166 nucleotide binding; GO:0004827 proline-tRNA ligase activity; GO:00…
P62843	IPI00319231	Rps15	RS15	40S ribosomal protein S15	1.343	1.258	1.3005	1.386	1.371	1.3785	0.704	0.775	0.7395	-0.953414	0.00320477	0.891	0.953	0.922	0.722	0.905	0.8135	1.458	1.617	1.5375	0.927962	0.00759735	GO:0097159 organic cyclic compound binding; GO:1901363 heterocyclic compound binding; GO:0003723 RNA binding; GO:0005488 binding; GO:0003676 nucleic acid binding; GO:0005198 structural molecule activity; GO:0003735 structural constituent of ribosome;
Q9DCX2	IPI00230507	Atp5h	ATP5H	ATP synthase subunit d	1.431	1.432	1.4315	1.59	1.758	1.674	1.484	1.734	1.609	0.321409	0.534487	1.219	1.228	1.2235	1.195	1.177	1.186	1.417	1.526	1.4715	0.927794	0.00763224	GO:0015075 ion transmembrane transporter activity; GO:0022892 substrate-specific transporter activity; GO:0015077 monovalent inorganic cation transmembrane transporter activity; GO:0022890 inorganic cation transmembrane transporter activity; GO:0015078 hydrogen ion transmembrane transporter activity; GO:0008324 cation transmembrane transporter activity; GO:0022891 substrate-specific transmembrane…
Q9QZ85	IPI00323496	Iigp1	IIGP1	Interferon-inducible GTPase 1	1.243	1.281	1.262	0.504	0.529	0.5165	0.403	0.391	0.397	-0.733957	0.0967534	0.719	0.783	0.751	0.692	0.757	0.7245	0.528	0.598	0.563	-0.927786	0.00763407	GO:1901265 nucleoside phosphate binding; GO:0001882 nucleoside binding; GO:0043167 ion binding; GO:0000166 nucleotide binding; GO:0097159 organic cyclic compound binding; GO:1901363 heterocyclic compound binding; GO:0032549 ribonucleoside binding; GO:0097367 carbohydrate derivative binding; GO:0032553 ribonucleotide binding; GO:0005488 binding; GO:0032550 purine ribonucleoside binding; GO:0043168…
Q9CQT5	IPI00133070	Pomp	POMP	Proteasome maturation protein	2.125	2.15	2.1375	2.623	2.627	2.625	2.108	2.132	2.12	-0.371261	0.468695	1.103	1.15	1.1265	1.44	1.597	1.5185	1.857	2.08	1.9685	0.927513	0.00769114
P02089	IPI00316491	Hbb-b2	HBB2	Hemoglobin subunit beta-2	1.571	1.669	1.62	1.413	1.559	1.486	1.806	2.062	1.934	0.804934	0.053365	0.829	0.842	0.8355	0.899	0.949	0.924	1.359	1.821	1.59	0.926939	0.00781179	GO:0097159 organic cyclic compound binding; GO:1901363 heterocyclic compound binding; GO:0020037 heme binding; GO:0005506 iron ion binding; GO:0046914 transition metal ion binding; GO:0019825 oxygen binding; GO:0005488 binding; GO:0043167 ion binding; GO:0046872 metal ion binding; GO:0043169 cation binding; GO:0046906 tetrapyrrole binding;
Q9JMD3	IPI00125515	Stard10	PCTP-L	PCTP-like protein	0.717	0.692	0.7045	0.655	0.635	0.645	0.489	0.576	0.5325	-0.9221	0.00886622	0.882	0.835	0.8585	0.775	0.769	0.772	0.678	0.685	0.6815	-0.926886	0.00782304	GO:0008289 lipid binding; GO:0005488 binding;
P68254	IPI00408378	Ywhaq	1433T	LOC100503129 Isoform 1 of 14-3-3 protein theta	1.465	1.296	1.3805	1.282	1.088	1.185	1.042	1.123	1.0825	-0.730699	0.0990194	1.17	1.073	1.1215	1.138	1.06	1.099	1.668	1.456	1.562	0.926646	0.00787383	GO:0019904 protein domain specific binding; GO:0005515 protein binding; GO:0005488 binding;
Q9CR68	IPI00133240	Uqcrfs1	UCRI	Cytochrome b-c1 complex subunit Rieske	0.782	0.859	0.8205	0.774	1.005	0.8895	0.496	0.619	0.5575	-0.816224	0.0475569	0.907	0.982	0.9445	1.009	1.06	1.0345	0.412	0.563	0.4875	-0.926225	0.00796342	GO:0051537 2 iron, 2 sulfur cluster binding; GO:0008121 ubiquinol-cytochrome-c reductase activity; GO:0015075 ion transmembrane transporter activity; GO:0016679 oxidoreductase activity, acting on diphenols and related substances as donors; GO:0022892 substrate-specific transporter activity; GO:0015077 monovalent inorganic cation transmembrane transporter activity; GO:0015078 hydrogen ion transmem…
P35980	IPI00555113	Rpl18	RL18	60S ribosomal protein L18	0.602	0.558	0.58	0.463	0.438	0.4505	0.395	0.451	0.423	-0.723224	0.104306	0.844	0.836	0.84	0.592	0.632	0.612	0.426	0.38	0.403	-0.925829	0.00804794	GO:0003735 structural constituent of ribosome; GO:0005198 structural molecule activity;
Q91ZJ5	IPI00131204	Ugp2	UGPA	Isoform 1 of UTP--glucose-1-phosphate uridylyltransferase	0.624	0.644	0.634	0.508	0.511	0.5095	0.309	0.349	0.329	-0.965096	0.00180614	0.953	0.825	0.889	0.695	0.683	0.689	0.444	0.489	0.4665	-0.925676	0.00808071	GO:0051748 UTP-monosaccharide-1-phosphate uridylyltransferase activity; GO:0016779 nucleotidyltransferase activity; GO:0070569 uridylyltransferase activity; GO:0016740 transferase activity; GO:0003983 UTP:glucose-1-phosphate uridylyltransferase activity; GO:0003824 catalytic activity; GO:0016772 transferase activity, transferring phosphorus-containing groups;
O88569	IPI00828488	Hnrnpa2b1	ROA2	Isoform 1 of Heterogeneous nuclear ribonucleoproteins A2/B1	1.027	1.04	1.0335	0.85	0.926	0.888	0.781	0.874	0.8275	-0.773651	0.0710527	1.206	1.165	1.1855	0.929	0.905	0.917	0.511	0.704	0.6075	-0.925628	0.0080912	GO:0097159 organic cyclic compound binding; GO:1901363 heterocyclic compound binding; GO:1901265 nucleoside phosphate binding; GO:0005488 binding; GO:0003676 nucleic acid binding; GO:0000166 nucleotide binding; GO:0036094 small molecule binding;
Q3TXS7	IPI00267295	Psmd1	PSMD1	26S proteasome non-ATPase regulatory subunit 1	0.598		0.598	0.518		0.518	0.571	0.696	0.6335	0.516184	0.483816	0.881	0.799	0.84	0.838	0.831	0.8345	0.467		0.467	-0.964135	0.00810957	GO:0030234 enzyme regulator activity; GO:0098772 molecular function regulator; GO:0005488 binding;
Q9DCS2	IPI00121271	0610011F06Rik	CP013	UPF0585 protein C16orf13 homolog	0.679	0.613	0.646	0.774	0.642	0.708	0.812	0.578	0.695	0.151116	0.775051	0.858	0.956	0.907	0.992	0.866	0.929	0.559	0.362	0.4605	-0.925228	0.00817728
Q68FD5	IPI00169916	Cltc	CLH1	Clathrin heavy chain 1	0.761	0.72	0.7405	0.639	0.632	0.6355	0.616	0.676	0.646	-0.520187	0.290099	0.932	0.948	0.94	0.803	0.791	0.797	0.646	0.686	0.666	-0.924199	0.00840102	GO:0005515 protein binding; GO:0005198 structural molecule activity; GO:0005488 binding;
P21981	IPI00126861	Tgm2	TGM2	Protein-glutamine gamma-glutamyltransferase 2	1.441	1.201	1.321	0.853	0.729	0.791	1.416	1.392	1.404	0.439714	0.382938	0.699	0.781	0.74	0.611	0.62	0.6155	1.174	1.267	1.2205	0.923809	0.00848648	GO:0016746 transferase activity, transferring acyl groups; GO:0003824 catalytic activity; GO:0016740 transferase activity; GO:0003810 protein-glutamine gamma-glutamyltransferase activity; GO:0016755 transferase activity, transferring amino-acyl groups;
P07309	IPI00127560	Ttr	TTHY	Transthyretin	1.419	1.535	1.477	1.714	2	1.857	1.325	1.329	1.327	-0.545842	0.262552	1.149	1.101	1.125	1.081	1.231	1.156	2.118	2.996	2.557	0.921944	0.00890126
Q3UEG6	IPI00128738	Agxt2	AGT2	Alanine--glyoxylate aminotransferase 2	0.861	0.815	0.838	0.762	0.786	0.774	0.555	0.568	0.5615	-0.990357	0.000139038	0.863	0.923	0.893	0.922	0.949	0.9355	0.625	0.705	0.665	-0.920512	0.00922629	GO:0097159 organic cyclic compound binding; GO:1901363 heterocyclic compound binding; GO:0016769 transferase activity, transferring nitrogenous groups; GO:0003824 catalytic activity; GO:0005488 binding; GO:0043167 ion binding; GO:0043168 anion binding; GO:0008483 transaminase activity; GO:0016740 transferase activity; GO:0048037 cofactor binding; GO:0030170 pyridoxal phosphate binding;
P08113	IPI00129526	Hsp90b1	ENPL	Endoplasmin	0.786	0.778	0.782	0.655	0.637	0.646	0.53	0.582	0.556	-0.879803	0.0208027	0.879	0.826	0.8525	0.766	0.755	0.7605	0.664	0.675	0.6695	-0.91755	0.00991687	GO:0005524 ATP binding; GO:1901265 nucleoside phosphate binding; GO:0001882 nucleoside binding; GO:0043167 ion binding; GO:0005515 protein binding; GO:0000166 nucleotide binding; GO:0097159 organic cyclic compound binding; GO:1901363 heterocyclic compound binding; GO:0032549 ribonucleoside binding; GO:0097367 carbohydrate derivative binding; GO:0032553 ribonucleotide binding; GO:0005488 binding; …
Q60598	IPI00118143	Cttn	SRC8	Src substrate cortactin	1.264	1.105	1.1845	0.976	0.932	0.954	0.798	0.795	0.7965	-0.859187	0.0283465	1.033	1.026	1.0295	1.139	1.121	1.13	0.717	0.603	0.66	-0.917037	0.0100389	GO:0005515 protein binding; GO:0005488 binding;
P58710	IPI00554830	Gulo	GGLO	L-gulonolactone oxidase	0.559	0.607	0.583	0.35	0.378	0.364	0.257	0.319	0.288	-0.797484	0.0573664	0.892	0.966	0.929	0.548	0.578	0.563	0.255	0.26	0.2575	-0.916971	0.0100545	GO:0003885 D-arabinono-1,4-lactone oxidase activity; GO:1901265 nucleoside phosphate binding; GO:0050660 flavin adenine dinucleotide binding; GO:0043167 ion binding; GO:0000166 nucleotide binding; GO:0048037 cofactor binding; GO:0016491 oxidoreductase activity; GO:0016614 oxidoreductase activity, acting on CH-OH group of donors; GO:1901363 heterocyclic compound binding; GO:0097159 organic cyclic …
O08583	IPI00114407	Thoc4	THOC4	Isoform 1 of THO complex subunit 4	1.6	1.868	1.734	1.228	1.589	1.4085	0.995	1.236	1.1155	-0.802128	0.0548563	1.302	1.234	1.268	1.085	1.252	1.1685	0.98	0.907	0.9435	-0.916186	0.0102429	GO:0097159 organic cyclic compound binding; GO:1901363 heterocyclic compound binding; GO:1901265 nucleoside phosphate binding; GO:0005488 binding; GO:0003676 nucleic acid binding; GO:0000166 nucleotide binding; GO:0036094 small molecule binding;
O55022	IPI00319973	Pgrmc1	PGRC1	Membrane-associated progesterone receptor component 1	1.521	1.504	1.5125	1.481	1.55	1.5155	2.023	2.31	2.1665	0.949797	0.00371726	1.573	1.749	1.661	1.236	1.406	1.321	0.955	0.973	0.964	-0.916092	0.0102655
Q9CQB4	IPI00132347	Uqcrb	QCR7	Uncharacterized protein	2.186	2.386	2.286	2.262	2.579	2.4205	1.452	1.532	1.492	-0.920038	0.00933526	1.062	1.064	1.063	1.332	1.202	1.267	1.53	1.893	1.7115	0.915935	0.0103033
Q8VDM4	IPI00123494	Psmd2	PSMD2	26S proteasome non-ATPase regulatory subunit 2	0.763	0.719	0.741	0.801	0.686	0.7435		0.705	0.705	-0.342556	0.572531	1.517	1.421	1.469	1.633	1.646	1.6395	0.932	0.75	0.841	-0.91592	0.010307	GO:0030234 enzyme regulator activity; GO:0098772 molecular function regulator; GO:0005488 binding;
Q9D7M1	IPI00110487	2310003C23Rik	GID8	Protein C20orf11 homolog	2.156	2.228	2.192	1.411	1.589	1.5	1.478	1.768	1.623	-0.479319	0.336082	1.148	1.466	1.307	1.092	1.514	1.303	0.498	0.487	0.4925	-0.915754	0.010347	GO:0005515 protein binding; GO:0005488 binding;
P28843	IPI00125813	Dpp4	DPP4	Dipeptidyl peptidase 4	0.601	0.682	0.6415	0.483	0.608	0.5455	0.354	0.417	0.3855	-0.895099	0.0159292	0.845	0.921	0.883	0.639	0.691	0.665	0.437	0.493	0.465	-0.915404	0.0104321	GO:0004252 serine-type endopeptidase activity; GO:0004175 endopeptidase activity; GO:0008233 peptidase activity; GO:0003824 catalytic activity; GO:0017171 serine hydrolase activity; GO:0008236 serine-type peptidase activity; GO:0070011 peptidase activity, acting on L-amino acid peptides; GO:0016787 hydrolase activity;
P61087	IPI00322440	Ube2k	UBE2K	Ubiquitin-conjugating enzyme E2 K	0.895	0.946	0.9205	0.704	0.783	0.7435	0.856	1.012	0.934	0.343865	0.504533	0.953	0.963	0.958	1.159	1.007	1.083	0.378	0.515	0.4465	-0.915099	0.0105064	GO:0005515 protein binding; GO:0005488 binding;
P35492	IPI00118625	Hal	Histidase	Histidine ammonia-lyase	0.764	0.744	0.754	0.68	0.767	0.7235	0.558	0.503	0.5305	-0.9552	0.0029656	1.058	0.993	1.0255	0.802	0.811	0.8065	0.652	0.518	0.585	-0.914556	0.0106392	GO:0016829 lyase activity; GO:0016840 carbon-nitrogen lyase activity; GO:0004397 histidine ammonia-lyase activity; GO:0003824 catalytic activity; GO:0016841 ammonia-lyase activity;
D3Z7M8	IPI00113713	Gm5614	D3Z7M8	Uncharacterized protein	0.647	0.681	0.664	0.469	0.475	0.472	0.467	0.565	0.516	-0.430827	0.393742	0.824	0.889	0.8565	0.979	1.021	1	0.358	0.43	0.394	-0.913961	0.0107857	GO:0003735 structural constituent of ribosome; GO:0005198 structural molecule activity;
Q8R4V3	IPI00330685	Acat3	THIC	Acetyl CoA transferase-like protein	0.784	0.76	0.772	0.718	0.79	0.754	0.415	0.421	0.418	-0.982873	0.000437475	0.817	0.841	0.829	0.844	0.882	0.863	0.476	0.631	0.5535	-0.912585	0.011128	GO:0016746 transferase activity, transferring acyl groups; GO:0016747 transferase activity, transferring acyl groups other than amino-acyl groups; GO:0003824 catalytic activity; GO:0016740 transferase activity;
P62983	IPI00470152	Rps27a	RS27A	Ubiquitin-40S ribosomal protein S27a	2.021	1.888	1.9545	1.552	1.561	1.5565	1.845	2.063	1.954	0.318322	0.538645	1.14	1.091	1.1155	1.376	1.225	1.3005	0.495	0.528	0.5115	-0.912496	0.0111504	GO:0005515 protein binding; GO:0003735 structural constituent of ribosome; GO:0005198 structural molecule activity; GO:0005488 binding;
Q99JB2	IPI00115117	Stoml2	STML2	Stomatin-like protein 2	1.579	1.738	1.6585	1.551	1.69	1.6205	0.885	1.071	0.978	-0.960383	0.00232323	0.95	0.983	0.9665	1.341	1.305	1.323	1.57	1.883	1.7265	0.912197	0.0112255
Q8VBW8	IPI00121493	Ttc36	TTC36	Tetratricopeptide repeat protein 36	1.414	1.535	1.4745	1.454	1.79	1.622	0.715	0.823	0.769	-0.906924	0.0125915	1.172	1.287	1.2295	1.285	1.315	1.3	0.729	0.914	0.8215	-0.911853	0.0113124	GO:0005515 protein binding; GO:0005488 binding;
O88428	IPI00754489	Papss2	PAPSS 2	Bifunctional 3'-phosphoadenosine 5'-phosphosulfate synthase 2	0.747	0.7	0.7235	0.614	0.575	0.5945	0.352	0.338	0.345	-0.97938	0.000633382	0.901	0.775	0.838	0.936	0.864	0.9	0.554	0.535	0.5445	-0.910432	0.0116744	GO:0005524 ATP binding; GO:0004779 sulfate adenylyltransferase activity; GO:1901265 nucleoside phosphate binding; GO:0016773 phosphotransferase activity, alcohol group as acceptor; GO:0001882 nucleoside binding; GO:0043167 ion binding; GO:0000166 nucleotide binding; GO:0070566 adenylyltransferase activity; GO:0097159 organic cyclic compound binding; GO:1901363 heterocyclic compound binding; GO:00…
P62075	IPI00134484	Timm13	TIM13	Mitochondrial import inner membrane translocase subunit Tim13	1.693	1.59	1.6415	1.781	1.852	1.8165	1.971	2.122	2.0465	0.91161	0.011374	1.216	1.193	1.2045	1.354	1.414	1.384	1.523	1.72	1.6215	0.909574	0.0118955
Q9JIF7	IPI00120503	Copb1	COPB	Coatomer subunit beta	0.845	0.87	0.8575	0.648	0.642	0.645	0.661	0.691	0.676	-0.528597	0.280953	0.866	0.822	0.844	0.992	0.982	0.987	0.447	0.425	0.436	-0.908818	0.0120921	GO:0005198 structural molecule activity; GO:0005488 binding;
Q8BWU8	IPI00406756	Agxt2l1	AT2L1	Alanine--glyoxylate aminotransferase 2-like 1	1.376	1.305	1.3405	1.418	1.488	1.453	0.411	0.621	0.516	-0.94791	0.00399935	1.022	1.018	1.02	0.999	1.04	1.0195	0.729	0.873	0.801	-0.908702	0.0121226	GO:0097159 organic cyclic compound binding; GO:1901363 heterocyclic compound binding; GO:0016769 transferase activity, transferring nitrogenous groups; GO:0003824 catalytic activity; GO:0005488 binding; GO:0043167 ion binding; GO:0043168 anion binding; GO:0008483 transaminase activity; GO:0016740 transferase activity; GO:0048037 cofactor binding; GO:0030170 pyridoxal phosphate binding;
P80315	IPI00116277	Cct4	TCPD	T-complex protein 1 subunit delta	0.768	0.808	0.788	0.702	0.802	0.752	0.588	0.711	0.6495	-0.776731	0.069209	0.835	0.804	0.8195	0.831	0.801	0.816	0.715	0.755	0.735	-0.90841	0.0121989	GO:0005524 ATP binding; GO:1901265 nucleoside phosphate binding; GO:0001882 nucleoside binding; GO:0043167 ion binding; GO:0005515 protein binding; GO:0000166 nucleotide binding; GO:0097159 organic cyclic compound binding; GO:1901363 heterocyclic compound binding; GO:0032549 ribonucleoside binding; GO:0097367 carbohydrate derivative binding; GO:0032553 ribonucleotide binding; GO:0005488 binding; …
Q61699	IPI00123802	Hsph1	HS105	Isoform HSP105-alpha of Heat shock protein 105 kDa	1.214	1.156	1.185	1.082	1.057	1.0695	1.48	1.687	1.5835	0.890073	0.0174618	1.308	1.383	1.3455	1.356	1.417	1.3865	1.163	1.149	1.156	-0.907349	0.0124786
P99027	IPI00139795	Rplp2	RLA2	60S acidic ribosomal protein P2	1.277	1.256	1.2665	1.073	1.05	1.0615	1.115	1.314	1.2145	0.0860977	0.871173	1.172	1.174	1.173	1.454	1.423	1.4385	0.443	0.447	0.445	-0.906902	0.0125974	GO:0003735 structural constituent of ribosome; GO:0005198 structural molecule activity;
Q8R5L1	IPI00132799	C1qbp	C1QBP	complement component 1 Q subcomponent-binding protein	1.292	1.519	1.4055	1.089	1.535	1.312	0.979	1.279	1.129	-0.55562	0.252334	1.281	1.285	1.283	1.451	1.431	1.441	0.398	0.762	0.58	-0.905408	0.0129984
O55060	IPI00115215	Tpmt	TPMT	Thiopurine S-methyltransferase	0.667	0.611	0.639	0.59	0.567	0.5785	0.559	0.588	0.5735	-0.580773	0.226787	0.758	1.003	0.8805	0.794	0.847	0.8205	0.554	0.464	0.509	-0.904046	0.0133689	GO:0008757 S-adenosylmethionine-dependent methyltransferase activity; GO:0016741 transferase activity, transferring one-carbon groups; GO:0008168 methyltransferase activity; GO:0008119 thiopurine S-methyltransferase activity; GO:0003824 catalytic activity; GO:0016740 transferase activity; GO:0008172 S-methyltransferase activity;
Q60866	IPI00121517	Pter	PTER	Isoform 1 of Phosphotriesterase-related protein	0.681	0.678	0.6795	0.584	0.601	0.5925	0.296	0.327	0.3115	-0.996384	1.95856e-05	0.779	0.783	0.781	0.77	0.86	0.815	0.496	0.606	0.551	-0.903886	0.013413	GO:0046914 transition metal ion binding; GO:0003824 catalytic activity; GO:0005488 binding; GO:0016788 hydrolase activity, acting on ester bonds; GO:0043167 ion binding; GO:0046872 metal ion binding; GO:0043169 cation binding; GO:0016787 hydrolase activity; GO:0008270 zinc ion binding;
Q8BH95	IPI00454049	Echs1	ECHM	Enoyl-CoA hydratase	0.778	0.76	0.769	0.776	0.795	0.7855	0.609	0.709	0.659	-0.845247	0.0340699	0.877	0.926	0.9015	0.933	0.912	0.9225	0.757	0.805	0.781	-0.903395	0.013548	GO:0003824 catalytic activity;
Q2TJH4	IPI00154057	Pcdh1	PCDH1	Uncharacterized protein	0.856	0.794	0.825	0.667	0.729	0.698	0.47	0.532	0.501	-0.949214	0.00380329	1.382	1.36	1.371	0.76	0.759	0.7595	0.321	0.316	0.3185	-0.903168	0.0136107	GO:0043169 cation binding; GO:0046872 metal ion binding; GO:0005509 calcium ion binding; GO:0005488 binding; GO:0043167 ion binding;
P70194	IPI00330594	Clec4f	CLC4F	C-type lectin domain family 4 member F	1.459	1.449	1.454	1.113	1.139	1.126	0.539	0.545	0.542	-0.981858	0.000490739	0.96	0.933	0.9465	0.831	0.782	0.8065	1.305	1.357	1.331	0.902803	0.0137116
Q8VDN2	IPI00311682	Atp1a1	AT1A1	Sodium/potassium-transporting ATPase subunit alpha-1	0.665	0.717	0.691	0.526	0.59	0.558	0.372	0.383	0.3775	-0.949186	0.00380749	0.906	0.917	0.9115	0.638	0.661	0.6495	0.427	0.485	0.456	-0.901786	0.0139954	GO:0042625 ATPase coupled ion transmembrane transporter activity; GO:1901265 nucleoside phosphate binding; GO:0008556 potassium-transporting ATPase activity; GO:0015399 primary active transmembrane transporter activity; GO:0005391 sodium:potassium-exchanging ATPase activity; GO:0022892 substrate-specific transporter activity; GO:0016817 hydrolase activity, acting on acid anhydrides; GO:0015077 mo…
P25688	IPI00223367	Uox	URIC	Uricase	0.654	0.64	0.647	0.724	0.715	0.7195	0.684	0.708	0.696	0.351652	0.494265	0.869	0.877	0.873	0.951	0.942	0.9465	0.603	0.687	0.645	-0.901121	0.0141823	GO:0016663 oxidoreductase activity, acting on other nitrogenous compounds as donors, oxygen as acceptor; GO:0003824 catalytic activity; GO:0004846 urate oxidase activity; GO:0016491 oxidoreductase activity; GO:0016661 oxidoreductase activity, acting on other nitrogenous compounds as donors;
P27546	IPI00408119	Mtap4	MAP4	Isoform 1 of Microtubule-associated protein 4	2.259	2.347	2.303	2.005	2.383	2.194	1.788	1.98	1.884	-0.814989	0.0481774	1.199	1.388	1.2935	1.388	1.719	1.5535	2.059	1.892	1.9755	0.898558	0.0149139	GO:0015631 tubulin binding; GO:0005515 protein binding; GO:0008092 cytoskeletal protein binding; GO:0005488 binding;
P24549	IPI00626662	Aldh1a1	RalDH1	Retinal dehydrogenase 1	0.633	0.65	0.6415	0.517	0.611	0.564	0.801	0.853	0.827	0.860043	0.0280112	0.827	0.836	0.8315	0.952	1.016	0.984	0.257	0.446	0.3515	-0.898182	0.0150226	GO:0016620 oxidoreductase activity, acting on the aldehyde or oxo group of donors, NAD or NADP as acceptor; GO:0003824 catalytic activity; GO:0016491 oxidoreductase activity; GO:0016903 oxidoreductase activity, acting on the aldehyde or oxo group of donors;
P61458	IPI00223800	Pcbd1	PHS	Pterin-4-alpha-carbinolamine dehydratase	1.468	1.418	1.443	1.627	1.699	1.663	1.207	1.313	1.26	-0.711356	0.112949	0.882	0.918	0.9	1.454	1.46	1.457	1.772	1.949	1.8605	0.895978	0.0156682	GO:0016829 lyase activity; GO:0016836 hydro-lyase activity; GO:0008124 4-alpha-hydroxytetrahydrobiopterin dehydratase activity; GO:0003824 catalytic activity; GO:0016835 carbon-oxygen lyase activity;
O35728	IPI00133877	Cyp4a14	CYPIVA14	Cytochrome P450 4A14	0.681	0.716	0.6985	1.56	1.715	1.6375	2.664	3.361	3.0125	0.948781	0.00386794	1.493	1.534	1.5135	3.629	3.74	3.6845	5.012	5.351	5.1815	0.895746	0.0157369	GO:0097159 organic cyclic compound binding; GO:1901363 heterocyclic compound binding; GO:0020037 heme binding; GO:0005506 iron ion binding; GO:0046914 transition metal ion binding; GO:0003824 catalytic activity; GO:0005488 binding; GO:0043167 ion binding; GO:0043169 cation binding; GO:0046872 metal ion binding; GO:0016705 oxidoreductase activity, acting on paired donors, with incorporation or red…
Q9D8B3	IPI00171974	Chmp4b	CHM4B	Charged multivesicular body protein 4b	2.092	1.856	1.974	1.954	1.699	1.8265	1.776	1.866	1.821	-0.375918	0.462685	1.184	1.183	1.1835	1.267	1.228	1.2475	1.464	1.324	1.394	0.89552	0.0158037
Q8C5H8	IPI00651954	1110020G09Rik	NAKD2	Isoform 3 of NAD kinase domain-containing protein 1	0.722	0.704	0.713	0.658	0.622	0.64	0.451	0.465	0.458	-0.987668	0.000227189	0.805	0.753	0.779	0.893	0.82	0.8565	0.542	0.558	0.55	-0.895414	0.0158354	GO:0003951 NAD+ kinase activity; GO:0016301 kinase activity; GO:0016773 phosphotransferase activity, alcohol group as acceptor; GO:0003824 catalytic activity; GO:0016740 transferase activity; GO:0016772 transferase activity, transferring phosphorus-containing groups;
Q8C196	IPI00111908	Cps1	CPSM	Carbamoyl-phosphate synthase [ammonia]	0.762	0.735	0.7485	0.565	0.551	0.558	0.255	0.256	0.2555	-0.975031	0.000927386	0.774	0.766	0.77	0.508	0.521	0.5145	0.339	0.345	0.342	-0.89497	0.0159677	GO:0005524 ATP binding; GO:1901265 nucleoside phosphate binding; GO:0016874 ligase activity; GO:0001882 nucleoside binding; GO:0043167 ion binding; GO:0000166 nucleotide binding; GO:0016884 carbon-nitrogen ligase activity, with glutamine as amido-N-donor; GO:0016879 ligase activity, forming carbon-nitrogen bonds; GO:0097159 organic cyclic compound binding; GO:1901363 heterocyclic compound binding…
P61759	IPI00121851	Vbp1	PFD3	Prefoldin subunit 3	1.258	1.333	1.2955	0.983	1.076	1.0295	0.91	1.096	1.003	-0.632596	0.177682	1.037	1.104	1.0705	1.323	1.357	1.34	0.38	0.45	0.415	-0.893202	0.0164997
Q91X42	IPI00471137	Akr1c12	AK1C12	aldo-keto reductase family 1, member C12	0.699	0.625	0.662	0.682	0.604	0.643	0.492	0.446	0.469	-0.928779	0.00742797	0.908	0.928	0.918	1.112	1.036	1.074	0.561	0.481	0.521	-0.891651	0.0169732	GO:0003824 catalytic activity; GO:0016491 oxidoreductase activity;
Q6V954	IPI00469380	Aox3	AOXC	Aldehyde oxidase 1	0.665	0.573	0.619	0.416	0.429	0.4225	0.224	0.168	0.196	-0.93729	0.00577555	0.956	0.864	0.91	0.475	0.433	0.454	0.173	0.115	0.144	-0.891053	0.0171575	GO:0051537 2 iron, 2 sulfur cluster binding; GO:1901265 nucleoside phosphate binding; GO:0005506 iron ion binding; GO:0050660 flavin adenine dinucleotide binding; GO:0043167 ion binding; GO:0000166 nucleotide binding; GO:0048037 cofactor binding; GO:0016491 oxidoreductase activity; GO:0009055 electron carrier activity; GO:0016614 oxidoreductase activity, acting on CH-OH group of donors; GO:190136…
A2AJL3	IPI00116643	Fggy	FGGY	Isoform 2 of FGGY carbohydrate kinase domain-containing protein	0.716	0.716	0.716	0.617	0.637	0.627	0.352	0.339	0.3455	-0.997326	1.07195e-05	0.905	0.829	0.867	0.986	0.822	0.904	0.563	0.627	0.595	-0.890934	0.0171945	GO:0016773 phosphotransferase activity, alcohol group as acceptor; GO:0003824 catalytic activity; GO:0016740 transferase activity; GO:0016772 transferase activity, transferring phosphorus-containing groups;
Q61656	IPI00420363	Ddx5	DDX5	Probable ATP-dependent RNA helicase DDX5	0.708	0.708	0.708	0.592	0.685	0.6385	0.624	0.687	0.6555	-0.2993	0.564455	0.848	0.914	0.881	0.727	0.732	0.7295	0.6	0.633	0.6165	-0.890158	0.0174353	GO:0005524 ATP binding; GO:1901265 nucleoside phosphate binding; GO:0001882 nucleoside binding; GO:0043167 ion binding; GO:0000166 nucleotide binding; GO:0097159 organic cyclic compound binding; GO:1901363 heterocyclic compound binding; GO:0032549 ribonucleoside binding; GO:0097367 carbohydrate derivative binding; GO:0032553 ribonucleotide binding; GO:0005488 binding; GO:0003676 nucleic acid bind…
Q9CYJ8	IPI00111589	Cbx1	CBX1	Uncharacterized protein	1.713	1.558	1.6355	1.405	1.363	1.384	1.065	1.122	1.0935	-0.930065	0.00716524	1.289	1.355	1.322	1.156	1.242	1.199	1.044	1.101	1.0725	-0.889962	0.0174963
P33267	IPI00308328	Cyp2f2	CYPIIF2	Cytochrome P450 2F2	0.819	0.736	0.7775	0.692	0.693	0.6925	0.477	0.445	0.461	-0.978167	0.000709794	0.868	0.936	0.902	0.573	0.577	0.575	0.338	0.375	0.3565	-0.889606	0.0176076	GO:0005506 iron ion binding; GO:0019825 oxygen binding; GO:0043167 ion binding; GO:0016705 oxidoreductase activity, acting on paired donors, with incorporation or reduction of molecular oxygen; GO:0016491 oxidoreductase activity; GO:1901363 heterocyclic compound binding; GO:0097159 organic cyclic compound binding; GO:0020037 heme binding; GO:0046914 transition metal ion binding; GO:0003824 cataly…
P04939	IPI00120832	Mup3	MUP3	Major urinary protein 3	1.284	1.137	1.2105	1.301	1.336	1.3185	0.534	0.62	0.577	-0.941734	0.00499349	0.959	0.934	0.9465	1.131	1.268	1.1995	0.292	0.365	0.3285	-0.889407	0.01767	GO:0005549 odorant binding; GO:0005550 pheromone binding; GO:0005488 binding; GO:0005215 transporter activity; GO:0036094 small molecule binding;
Q03958	IPI00138238	H2-Ke2	PFD6	Prefoldin subunit 6	1.968	1.994	1.981		2.124	2.124	1.716	1.716	1.716	-0.8889	0.0437049	1.266	1.176	1.221		1.339	1.339	1.482	1.465	1.4735	0.939387	0.0177498	GO:0005515 protein binding; GO:0051082 unfolded protein binding; GO:0005488 binding;
Q9JLJ2	IPI00124372	Aldh9a1	TMABADH	4-trimethylaminobutyraldehyde dehydrogenase	0.475	0.48	0.4775	0.553	0.56	0.5565	0.549	0.483	0.516	0.135837	0.797498	0.832	0.916	0.874	0.85	0.957	0.9035	0.627	0.695	0.661	-0.889032	0.0177878	GO:0016620 oxidoreductase activity, acting on the aldehyde or oxo group of donors, NAD or NADP as acceptor; GO:0003824 catalytic activity; GO:0016491 oxidoreductase activity; GO:0016903 oxidoreductase activity, acting on the aldehyde or oxo group of donors;
P56812	IPI00116120	Pdcd5	PDCD5-A	Programmed cell death protein 5	1.538	1.566	1.552	1.733	1.712	1.7225	1.763	1.836	1.7995	0.82384	0.0438152	1.351	1.348	1.3495	1.312	1.351	1.3315	1.493	1.658	1.5755	0.888862	0.0178411	GO:0097159 organic cyclic compound binding; GO:1901363 heterocyclic compound binding; GO:0003677 DNA binding; GO:0005488 binding; GO:0003676 nucleic acid binding;
P52196	IPI00223216	Tst	THTR	Thiosulfate sulfurtransferase	0.672	0.707	0.6895	0.719	0.734	0.7265	0.663	0.765	0.714	0.154121	0.770649	0.926	0.948	0.937	1.035	1.067	1.051	0.634	0.69	0.662	-0.888543	0.0179417	GO:0004792 thiosulfate sulfurtransferase activity; GO:0016782 transferase activity, transferring sulfur-containing groups; GO:0016783 sulfurtransferase activity; GO:0003824 catalytic activity; GO:0016740 transferase activity;
Q7TNG8	IPI00380320	Ldhd	LDHD	Probable D-lactate dehydrogenase	0.787	0.862	0.8245	0.72	0.78	0.75	0.673	0.75	0.7115	-0.686875	0.131721	0.594	0.611	0.6025	0.509	0.543	0.526	0.416	0.482	0.449	-0.886939	0.0184516	GO:0097159 organic cyclic compound binding; GO:1901363 heterocyclic compound binding; GO:0016614 oxidoreductase activity, acting on CH-OH group of donors; GO:1901265 nucleoside phosphate binding; GO:0050660 flavin adenine dinucleotide binding; GO:0003824 catalytic activity; GO:0005488 binding; GO:0043167 ion binding; GO:0043168 anion binding; GO:0000166 nucleotide binding; GO:0048037 cofactor bin…
Q61598	IPI00122565	Gdi2	GDIB	Isoform 1 of Rab GDP dissociation inhibitor beta	0.722	0.729	0.7255	0.656	0.713	0.6845	0.422	0.516	0.469	-0.962021	0.0021362	0.866	0.899	0.8825	0.707	0.823	0.765	0.571	0.667	0.619	-0.886297	0.0186576	GO:0030234 enzyme regulator activity; GO:0003824 catalytic activity; GO:0005093 Rab GDP-dissociation inhibitor activity; GO:0060589 nucleoside-triphosphatase regulator activity; GO:0005092 GDP-dissociation inhibitor activity; GO:0030695 GTPase regulator activity; GO:0098772 molecular function regulator; GO:0016491 oxidoreductase activity;
Q61176	IPI00117914	Arg1	ARGI1	Arginase-1	0.711	0.749	0.73	0.783	0.892	0.8375	0.633	0.701	0.667	-0.580696	0.226864	0.88	0.899	0.8895	0.861	0.914	0.8875	0.686	0.792	0.739	-0.885698	0.0188508	GO:0004053 arginase activity; GO:0003824 catalytic activity; GO:0005488 binding; GO:0016813 hydrolase activity, acting on carbon-nitrogen (but not peptide) bonds, in linear amidines; GO:0043167 ion binding; GO:0043169 cation binding; GO:0046872 metal ion binding; GO:0016787 hydrolase activity; GO:0016810 hydrolase activity, acting on carbon-nitrogen (but not peptide) bonds;
Q6PDN3	IPI00125493	Mylk	MYLK	myosin light chain kinase	1.315	1.097	1.206	0.818	0.74	0.779	0.74	0.699	0.7195	-0.690727	0.128684	1.351	1.247	1.299	1.627	1.46	1.5435	0.692	0.705	0.6985	-0.885461	0.0189273	GO:0005524 ATP binding; GO:1901265 nucleoside phosphate binding; GO:0016773 phosphotransferase activity, alcohol group as acceptor; GO:0001882 nucleoside binding; GO:0043167 ion binding; GO:0005515 protein binding; GO:0004672 protein kinase activity; GO:0000166 nucleotide binding; GO:0097159 organic cyclic compound binding; GO:1901363 heterocyclic compound binding; GO:0032549 ribonucleoside bindi…
Q9D881	IPI00116154	Cox5b	COX5B	cytochrome c oxidase subunit 5B	1.998	1.884	1.941	1.974	1.866	1.92	1.323	1.334	1.3285	-0.977326	0.000765352	1.274	1.254	1.264	1.215	1.335	1.275	1.442	1.403	1.4225	0.885212	0.0190083	GO:0015075 ion transmembrane transporter activity; GO:0022892 substrate-specific transporter activity; GO:0015077 monovalent inorganic cation transmembrane transporter activity; GO:0016676 oxidoreductase activity, acting on a heme group of donors, oxygen as acceptor; GO:0016675 oxidoreductase activity, acting on a heme group of donors; GO:0015078 hydrogen ion transmembrane transporter activity; G…
Q9DCG6	IPI00120864	Pbld	PBLD1	Phenazine biosynthesis-like domain-containing protein 1	0.738	0.688	0.713	0.75	0.633	0.6915	0.59	0.412	0.501	-0.830739	0.0405492	0.936	0.871	0.9035	0.932	0.795	0.8635	0.714	0.57	0.642	-0.885016	0.0190719	GO:0003824 catalytic activity;
Q9D903	IPI00111829	Ebna1bp2	EBP2	Probable rRNA-processing protein EBP2	1.893	1.764	1.8285	1.981	2.148	2.0645	2.028	2.175	2.1015	0.624381	0.185136	1.303	1.384	1.3435	1.236	1.297	1.2665	1.557	1.559	1.558	0.883943	0.0194224
Q91VD9	IPI00308882	Ndufs1	NDUS1	NADH-ubiquinone oxidoreductase 75 kDa subunit	0.743	0.762	0.7525	0.684	0.726	0.705	0.411	0.468	0.4395	-0.98789	0.000219077	0.843	0.887	0.865	1	1.011	1.0055	0.52	0.579	0.5495	-0.881903	0.0200968	GO:0009055 electron carrier activity; GO:0016651 oxidoreductase activity, acting on NAD(P)H; GO:0003954 NADH dehydrogenase activity; GO:0003824 catalytic activity; GO:0051536 iron-sulfur cluster binding; GO:0005488 binding; GO:0050136 NADH dehydrogenase (quinone) activity; GO:0016655 oxidoreductase activity, acting on NAD(P)H, quinone or similar compound as acceptor; GO:0008137 NADH dehydrogenase…
Q60936	IPI00122554	Cabc1	ADCK3	Isoform 1 of Chaperone activity of bc1 complex-like	1.294	1.574	1.434	1.255	1.626	1.4405	0.256	0.276	0.266	-0.956282	0.0028251	0.958	1.135	1.0465	1.027	1.167	1.097	0.577	0.757	0.667	-0.881277	0.0203061
P53395	IPI00130535	Dbt	ODB2	Lipoamide acyltransferase component of branched-chain alpha-keto acid dehydrogenase complex	0.682	0.796	0.739	0.445	0.721	0.583	0.258	0.411	0.3345	-0.843833	0.0346778	0.855	0.812	0.8335	0.987	0.774	0.8805	0.548	0.543	0.5455	-0.87873	0.0211679	GO:0016746 transferase activity, transferring acyl groups; GO:0003824 catalytic activity; GO:0016740 transferase activity;
Q9CQA3	IPI00338536	Sdhb	SDHB	Succinate dehydrogenase [ubiquinone] iron-sulfur subunit	0.813	0.8	0.8065	0.72	0.808	0.764	0.675	0.583	0.629	-0.897125	0.0153306	0.862	0.82	0.841	0.881	0.869	0.875	0.543	0.703	0.623	-0.878538	0.0212335	GO:0009055 electron carrier activity; GO:0051537 2 iron, 2 sulfur cluster binding; GO:0003824 catalytic activity; GO:0005488 binding; GO:0051536 iron-sulfur cluster binding; GO:0051540 metal cluster binding; GO:0016491 oxidoreductase activity;
Q8CE68	IPI00662244	Agl	AGL	Uncharacterized protein	0.367	0.533	0.45	0.392	0.587	0.4895	0.2	0.336	0.268	-0.711713	0.112685	0.582	0.666	0.624	0.631	0.791	0.711	0.27	0.357	0.3135	-0.878317	0.0213093	GO:0004134 4-alpha-glucanotransferase activity; GO:0016758 transferase activity, transferring hexosyl groups; GO:0090599 alpha-glucosidase activity; GO:0003824 catalytic activity; GO:0016798 hydrolase activity, acting on glycosyl bonds; GO:0004135 amylo-alpha-1,6-glucosidase activity; GO:0015926 glucosidase activity; GO:0004553 hydrolase activity, hydrolyzing O-glycosyl compounds; GO:0016757 tran…
P17182	IPI00462072	Eno1	ENOA	Alpha-enolase	0.674	0.737	0.7055	0.69	0.785	0.7375	0.49	0.667	0.5785	-0.699539	0.121853	0.849	0.87	0.8595	0.895	0.896	0.8955	0.59	0.735	0.6625	-0.878111	0.0213801	GO:0000287 magnesium ion binding; GO:0004634 phosphopyruvate hydratase activity; GO:0003824 catalytic activity; GO:0005488 binding; GO:0043167 ion binding; GO:0046872 metal ion binding; GO:0043169 cation binding; GO:0016829 lyase activity; GO:0016836 hydro-lyase activity; GO:0016835 carbon-oxygen lyase activity;
P26350	IPI00224784	Ptma	PTMA	Prothymosin alpha	1.337	1.298	1.3175	0.867	0.878	0.8725	0.971	1.112	1.0415	-0.298476	0.565582	1.023	1.057	1.04	1.285	1.352	1.3185	0.418	0.486	0.452	-0.877748	0.0215046
P41216	IPI00112549	Acsl1	LACS1	Long-chain-fatty-acid--CoA ligase 1	0.79	0.844	0.817	1.182	1.412	1.297	1.934	2.371	2.1525	0.950624	0.00359686	0.984	1.075	1.0295	1.267	1.404	1.3355	1.494	1.754	1.624	0.876512	0.0219324	GO:0003824 catalytic activity;
P29758	IPI00129178	Oat	OAT	Ornithine aminotransferase	0.893	0.915	0.904	0.509	0.561	0.535	0.259	0.269	0.264	-0.903641	0.0134802	1.154	1.145	1.1495	1.468	1.449	1.4585	0.464	0.555	0.5095	-0.876371	0.0219815	GO:0097159 organic cyclic compound binding; GO:1901363 heterocyclic compound binding; GO:0016769 transferase activity, transferring nitrogenous groups; GO:0003824 catalytic activity; GO:0005488 binding; GO:0043167 ion binding; GO:0043168 anion binding; GO:0008483 transaminase activity; GO:0016740 transferase activity; GO:0048037 cofactor binding; GO:0030170 pyridoxal phosphate binding;
P00493	IPI00284806	Hprt	HPRT	Hypoxanthine-guanine phosphoribosyltransferase	0.81		0.81	0.846	0.962	0.904	0.981	1.435	1.208	0.748639	0.145441	0.981	1.012	0.9965	0.916	1.354	1.135	1.491	1.788	1.6395	0.874334	0.0226958	GO:0016763 transferase activity, transferring pentosyl groups; GO:0016757 transferase activity, transferring glycosyl groups; GO:0003824 catalytic activity; GO:0016740 transferase activity; GO:0004422 hypoxanthine phosphoribosyltransferase activity;
O54734	IPI00117705	Ddost	OST48	Dolichyl-diphosphooligosaccharide--protein glycosyltransferase 48 kDa subunit	0.763	0.79	0.7765	0.7	0.785	0.7425	0.555	0.625	0.59	-0.927333	0.00772893	0.995	1.067	1.031	0.747	0.861	0.804	0.481	0.687	0.584	-0.872341	0.023405
Q3TRA8	IPI00627000	Sec16a	SC16A	SEC16 homolog A	0.958	1.516	1.237	1.167	1.478	1.3225	0.91	1.402	1.156	-0.212132	0.686575	1.124	1.101	1.1125	1.157	1.166	1.1615	1.375	1.773	1.574	0.871364	0.0237565
Q9JM96	IPI00124906	Cdc42ep4	BORG4	Cdc42 effector protein 4	2.87	2.592	2.731	2.609	2.51	2.5595	1.46	1.428	1.444	-0.987656	0.000227606	1.346	1.215	1.2805	1.157	1.263	1.21	1.522	1.725	1.6235	0.870685	0.0240024
O89086	IPI00130883	Rbm3	RBM3	Putative RNA-binding protein 3	1.946	1.926	1.936	1.518	1.559	1.5385	0.98	1.052	1.016	-0.961209	0.00222798	1.207	1.219	1.213	0.919	0.936	0.9275	1.723	1.866	1.7945	0.870641	0.0240185	GO:0097159 organic cyclic compound binding; GO:1901363 heterocyclic compound binding; GO:1901265 nucleoside phosphate binding; GO:0005488 binding; GO:0003676 nucleic acid binding; GO:0000166 nucleotide binding; GO:0036094 small molecule binding;
Q9EQU5	IPI00111560	Gm9531	SET	Isoform 1 of Protein SET	1.242	1.63	1.436	1.205	1.544	1.3745	1.357	1.596	1.4765	0.169895	0.747609	1.172	1.281	1.2265	1.104	1.27	1.187	1.544	1.925	1.7345	0.870059	0.0242302
Q62426	IPI00125931	Cstb	CYTB	Cystatin-B	2.572	2.746	2.659	1.875	2.211	2.043	1.932	2.426	2.179	-0.385759	0.450064	1.65	1.178	1.414	1.774		1.774	2.407	2.289	2.348	0.924836	0.0244561	GO:0030234 enzyme regulator activity; GO:0030414 peptidase inhibitor activity; GO:0061134 peptidase regulator activity; GO:0061135 endopeptidase regulator activity; GO:0004857 enzyme inhibitor activity; GO:0098772 molecular function regulator; GO:0004866 endopeptidase inhibitor activity; GO:0004869 cysteine-type endopeptidase inhibitor activity;
Q99KV1	IPI00320241	Dnajb11	DJB11	DnaJ homolog subfamily B member 11	1.021	0.804	0.9125	0.618	0.571	0.5945	0.622	0.496	0.559	-0.643361	0.168107	0.97	0.746	0.858	0.928	0.778	0.853	0.493	0.58	0.5365	-0.867331	0.0252341	GO:0005515 protein binding; GO:0051082 unfolded protein binding; GO:0005488 binding;
Q3UE29	IPI00928070	Psap	SAP	sulfated glycoprotein 1 isoform A preproprotein	1.953	1.907	1.93	1.519	1.499	1.509	2.558	2.537	2.5475	0.831389	0.0402476	1.419	1.392	1.4055	1.314	1.353	1.3335	1.547	1.559	1.553	0.866827	0.0254218
Q8QZR3	IPI00154043	Ces6	EST2A	carboxylesterase 6 isoform 1	0.684	0.651	0.6675	0.696	0.628	0.662	0.496	0.482	0.489	-0.955657	0.00290589	0.895	0.902	0.8985	0.713	0.791	0.752	0.498	0.679	0.5885	-0.866164	0.0256694
P10639	IPI00226993	Txn1	THIO	Thioredoxin	1.078	1.275	1.1765	1.028	1.14	1.084	1.198	1.419	1.3085	0.58767	0.219973	1.282	1.255	1.2685	1.554	1.589	1.5715	0.704	0.693	0.6985	-0.866145	0.0256766	GO:0015035 protein disulfide oxidoreductase activity; GO:0016667 oxidoreductase activity, acting on a sulfur group of donors; GO:0015036 disulfide oxidoreductase activity; GO:0003824 catalytic activity; GO:0016491 oxidoreductase activity;
Q9D8T2	IPI00111986	Gsdmd	GSDMD	Gasdermin-D	1.085	1.206	1.1455	0.721	0.783	0.752	0.367	0.379	0.373	-0.928313	0.00752434	0.905	0.939	0.922	0.847	0.94	0.8935	0.396	0.711	0.5535	-0.864317	0.026366
Q9D379	IPI00316509	Ephx1	HYEP	Epoxide hydrolase 1	0.646	0.62	0.633	0.686	0.846	0.766	1.286	1.368	1.327	0.985104	0.000331202	1.247	1.4	1.3235	1.115	1.218	1.1665	0.731	1.026	0.8785	-0.863578	0.0266471	GO:0033961 cis-stilbene-oxide hydrolase activity; GO:0016787 hydrolase activity; GO:0016801 hydrolase activity, acting on ether bonds; GO:0003824 catalytic activity; GO:0016803 ether hydrolase activity;
Q9DCS9	IPI00121288	Ndufb10	NDUB10	NADH dehydrogenase [ubiquinone] 1 beta subcomplex subunit 10	0.895	0.753	0.824	0.754	0.705	0.7295	0.627	0.649	0.638	-0.810732	0.0503435	0.887	0.839	0.863	1.142	1.111	1.1265	0.421	0.268	0.3445	-0.863259	0.0267686
Q922Q1	IPI00123276	Mosc2	MARC2	MOSC domain-containing protein 2	0.564	0.552	0.558	0.453	0.436	0.4445	0.359	0.374	0.3665	-0.893502	0.0164088	0.791	0.841	0.816	0.611	0.618	0.6145	0.503	0.508	0.5055	-0.861982	0.0272587	GO:0097159 organic cyclic compound binding; GO:1901363 heterocyclic compound binding; GO:0030151 molybdenum ion binding; GO:0046914 transition metal ion binding; GO:0003824 catalytic activity; GO:0005488 binding; GO:0043167 ion binding; GO:0046872 metal ion binding; GO:0043169 cation binding; GO:0043168 anion binding; GO:0048037 cofactor binding; GO:0030170 pyridoxal phosphate binding;
Q9CPY7	IPI00331436	Lap3	AMPL	Isoform 1 of Cytosol aminopeptidase	0.942	0.962	0.952	0.893	0.956	0.9245	0.477	0.544	0.5105	-0.984206	0.000372189	0.939	0.944	0.9415	0.861	0.93	0.8955	0.708	0.835	0.7715	-0.860877	0.0276864	GO:0008233 peptidase activity; GO:0008238 exopeptidase activity; GO:0046914 transition metal ion binding; GO:0003824 catalytic activity; GO:0005488 binding; GO:0008235 metalloexopeptidase activity; GO:0043167 ion binding; GO:0043169 cation binding; GO:0070011 peptidase activity, acting on L-amino acid peptides; GO:0046872 metal ion binding; GO:0008237 metallopeptidase activity; GO:0016787 hydrola…
Q91XF0	IPI00129096	Pnpo	PNPO	Pyridoxine-5'-phosphate oxidase	1.647	1.645	1.646	1.571	1.499	1.535	1.365	1.372	1.3685	-0.956541	0.00279204	1.46	1.327	1.3935	1.072	0.995	1.0335	0.844	0.805	0.8245	-0.860341	0.0278951	GO:0004733 pyridoxamine-phosphate oxidase activity; GO:1901265 nucleoside phosphate binding; GO:0043167 ion binding; GO:0000166 nucleotide binding; GO:0048037 cofactor binding; GO:0016491 oxidoreductase activity; GO:1901363 heterocyclic compound binding; GO:0097159 organic cyclic compound binding; GO:0097367 carbohydrate derivative binding; GO:0003824 catalytic activity; GO:0032553 ribonucleotide…
Q80XN0	IPI00330754	Bdh1	BDH	D-beta-hydroxybutyrate dehydrogenase	0.65	0.627	0.6385	0.593	0.589	0.591	0.493	0.546	0.5195	-0.920396	0.00925308	0.935	0.874	0.9045	1.051	1.112	1.0815	0.551	0.594	0.5725	-0.858909	0.0284555	GO:0003824 catalytic activity; GO:0016491 oxidoreductase activity;
Q3UER8	IPI00122312	Fgg	FIBG	Uncharacterized protein	1.065	0.692	0.8785	0.86	0.517	0.6885	1.024	0.626	0.825	0.0290779	0.956395	1.124	1.017	1.0705	0.733	0.656	0.6945	0.533	0.435	0.484	-0.855717	0.0297245	GO:0005515 protein binding; GO:0060090 binding, bridging; GO:0030674 protein binding, bridging; GO:0005102 receptor binding; GO:0005488 binding;
P99029	IPI00129517	Prdx5	PRDX5	Isoform Mitochondrial of Peroxiredoxin-5	1.51	1.718	1.614	1.592	2.06	1.826	1.445	1.525	1.485	-0.458748	0.360149	0.923	1.012	0.9675	1.079	0.974	1.0265	1.79	3.243	2.5165	0.853667	0.0305533	GO:0003824 catalytic activity; GO:0016491 oxidoreductase activity;
Q99LB2	IPI00318750	Dhrs4	DHRS4	Dehydrogenase/reductase SDR family member 4	0.651	0.645	0.648	0.858	0.863	0.8605	1.372	1.649	1.5105	0.974964	0.000932354	1.01	1.014	1.012	1.274	1.359	1.3165	1.425	1.552	1.4885	0.851932	0.0312631	GO:0003824 catalytic activity; GO:0016491 oxidoreductase activity;
Q9JJU8	IPI00122265	Sh3bgrl	SH3L1	SH3 domain-binding glutamic acid-rich-like protein	1.689	1.627	1.658	1.477	1.527	1.502	0.896	1.022	0.959	-0.989017	0.000180276	0.981	1.028	1.0045	1.23	1.159	1.1945	1.261	1.401	1.331	0.851249	0.0315446
Q3UWL8	IPI00378557	Pfdn4	PFDN4	prefoldin 4 isoform 1	1.702	1.877	1.7895	1.704	2.051	1.8775	1.246	1.637	1.4415	-0.713259	0.111543	1.044	1.107	1.0755	1.107	1.157	1.132	1.202	1.376	1.289	0.84963	0.0322165	GO:0005515 protein binding; GO:0051082 unfolded protein binding; GO:0005488 binding;
P42669	IPI00118447	Pura	PURA	Transcriptional activator protein Pur-alpha	1.033	0.845	0.939	0.774	0.652	0.713	0.572	0.598	0.585	-0.797934	0.0571209	1.102	1.163	1.1325	0.898	1.152	1.025	0.856	0.588	0.722	-0.846452	0.0335553
P19096	IPI00113223	Fasn	FAS	Fatty acid synthase	0.831	0.822	0.8265	1.38	1.393	1.3865	0.39	0.418	0.404	-0.712399	0.112177	0.857	0.872	0.8645	1.32	1.389	1.3545	1.491	1.796	1.6435	0.845725	0.0338651	GO:0016417 S-acyltransferase activity; GO:0004319 enoyl-[acyl-carrier-protein] reductase (NADPH, B-specific) activity; GO:0016628 oxidoreductase activity, acting on the CH-CH group of donors, NAD or NADP as acceptor; GO:0016787 hydrolase activity; GO:0016835 carbon-oxygen lyase activity; GO:0016614 oxidoreductase activity, acting on CH-OH group of donors; GO:0016297 acyl-[acyl-carrier-protein] hy…
B2RSU6	IPI00460453	Cgnl1	CGNL1	Cgnl1 protein	1.366	1.623	1.4945	1.001	1.241	1.121	0.754	0.881	0.8175	-0.85456	0.0301911	1.12	1.21	1.165	1.238	1.386	1.312	0.432	0.848	0.64	-0.845549	0.0339404	GO:0003774 motor activity; GO:0016462 pyrophosphatase activity; GO:0003824 catalytic activity; GO:0016817 hydrolase activity, acting on acid anhydrides; GO:0016787 hydrolase activity; GO:0016818 hydrolase activity, acting on acid anhydrides, in phosphorus-containing anhydrides; GO:0017111 nucleoside-triphosphatase activity;
Q9DBB8	IPI00172146	Dhdh	DHDH	Trans-1,2-dihydrobenzene-1,2-diol dehydrogenase	0.786	0.677	0.7315	0.776	0.729	0.7525	0.588	0.52	0.554	-0.881047	0.0203832	0.96	0.906	0.933	0.96	1.026	0.993	0.772	0.531	0.6515	-0.845062	0.0341489	GO:0003824 catalytic activity; GO:0016491 oxidoreductase activity;
Q9CR98	IPI00133411	Fam136a	F136A	Protein FAM136A	1.757	1.887	1.822	2.161	2.129	2.145	1.923	2.527	2.225	0.540658	0.268033	1.299	1.264	1.2815	1.533	1.559	1.546	1.616	1.838	1.727	0.84472	0.0342956
Q9QZ23	IPI00278230	Nfu1	NFU1	Nfu1 NFU1 iron-sulfur cluster scaffold homolog	1.45	1.63	1.54	1.784	1.968	1.876	1.44	1.59	1.515	-0.355122	0.489709	1.294	1.146	1.22	1.232	1.157	1.1945	1.422	1.733	1.5775	0.840945	0.035936	GO:0005506 iron ion binding; GO:0046914 transition metal ion binding; GO:0051536 iron-sulfur cluster binding; GO:0005488 binding; GO:0043167 ion binding; GO:0046872 metal ion binding; GO:0043169 cation binding; GO:0051540 metal cluster binding;
P55096	IPI00135646	Abcd3	ABCD3	ATP-binding cassette sub-family D member 3	0.654	0.659	0.6565	0.952	1.064	1.008	1.493	1.622	1.5575	0.966497	0.00166488	0.9	1.015	0.9575	1.517	1.4	1.4585	1.687	1.705	1.696	0.84075	0.0360215	GO:1901265 nucleoside phosphate binding; GO:0015399 primary active transmembrane transporter activity; GO:0005319 lipid transporter activity; GO:0022892 substrate-specific transporter activity; GO:0016817 hydrolase activity, acting on acid anhydrides; GO:0016787 hydrolase activity; GO:0016887 ATPase activity; GO:0097159 organic cyclic compound binding; GO:1901363 heterocyclic compound binding; GO…
P42932	IPI00469268	Cct8	TCPQ	T-complex protein 1 subunit theta	0.698	0.722	0.71	0.666	0.702	0.684	0.58	0.646	0.613	-0.870681	0.0240037	0.856	0.814	0.835	0.828	0.808	0.818	0.639	0.763	0.701	-0.840224	0.0362533	GO:0005524 ATP binding; GO:1901265 nucleoside phosphate binding; GO:0001882 nucleoside binding; GO:0043167 ion binding; GO:0005515 protein binding; GO:0000166 nucleotide binding; GO:0097159 organic cyclic compound binding; GO:1901363 heterocyclic compound binding; GO:0032549 ribonucleoside binding; GO:0097367 carbohydrate derivative binding; GO:0032553 ribonucleotide binding; GO:0005488 binding; …
Q9WVL0	IPI00126120	Gstz1	MAAI	Maleylacetoacetate isomerase	0.64	0.582	0.611	0.555	0.649	0.602	0.554	0.645	0.5995	-0.0933557	0.860373	0.902	0.788	0.845	0.888	0.911	0.8995	0.575	0.713	0.644	-0.84002	0.0363434	GO:0005515 protein binding; GO:0003824 catalytic activity; GO:0005488 binding;
P61922	IPI00227445	Abat	GABA-T	Isoform 2 of 4-aminobutyrate aminotransferase	0.784	0.748	0.766	0.694	0.665	0.6795	0.5	0.518	0.509	-0.977876	0.000728823	0.878	0.895	0.8865	1.07	1.103	1.0865	0.587	0.565	0.576	-0.838985	0.0368014	GO:0097159 organic cyclic compound binding; GO:1901363 heterocyclic compound binding; GO:0016769 transferase activity, transferring nitrogenous groups; GO:0003824 catalytic activity; GO:0005488 binding; GO:0043167 ion binding; GO:0043168 anion binding; GO:0008483 transaminase activity; GO:0016740 transferase activity; GO:0048037 cofactor binding; GO:0030170 pyridoxal phosphate binding;
Q9QXT0	IPI00135512	Cnpy2	CNPY2	Protein canopy homolog 2	1.383	1.516	1.4495	1.459	1.639	1.549	1.337	1.574	1.4555	-0.127278	0.810114	1.31	1.297	1.3035	1.303	1.39	1.3465	1.478	1.803	1.6405	0.837515	0.0374573
P43274	IPI00223714	Hist1h1e	H14	Histone H1.4	1.219	1.328	1.2735	2.271	2.436	2.3535	1.154	1.28	1.217	-0.38101	0.45614	1.355	1.402	1.3785	1.156	1.123	1.1395	1.073	0.959	1.016	-0.836998	0.0376892	GO:0097159 organic cyclic compound binding; GO:1901363 heterocyclic compound binding; GO:0003677 DNA binding; GO:0005488 binding; GO:0003676 nucleic acid binding;
P62702	IPI00331092	Rps4x	RS4X	40S ribosomal protein S4, X isoform	0.631	0.755	0.693	0.571	0.669	0.62	0.744	0.657	0.7005	0.240818	0.645757	0.955	0.869	0.912	0.66	0.668	0.664	0.511	0.576	0.5435	-0.83676	0.037796	GO:0097159 organic cyclic compound binding; GO:1901363 heterocyclic compound binding; GO:0003723 RNA binding; GO:0005488 binding; GO:0003676 nucleic acid binding; GO:0005198 structural molecule activity; GO:0003735 structural constituent of ribosome;
P68040	IPI00317740	Gnb2l1	GBLP	Guanine nucleotide-binding protein subunit beta-2-like 1	0.704	0.619	0.6615	0.567	0.478	0.5225	0.603	0.534	0.5685	-0.292719	0.573463	1.142	0.834	0.988	0.935	0.775	0.855	0.659	0.437	0.548	-0.833532	0.0392609	GO:0005515 protein binding; GO:0005488 binding;
Q06890	IPI00320420	Clu	CLUS	Clusterin	1.281	1.194	1.2375	0.987	0.965	0.976	2.344	2.517	2.4305	0.93811	0.00562704	1.066	1.062	1.064	0.829	0.903	0.866	1.4	1.343	1.3715	0.833521	0.0392661
P10711	IPI00121887	Tcea1	TCEA1	Isoform 2 of Transcription elongation factor A protein 1	1.611	1.736	1.6735	1.326	1.395	1.3605	1.2	1.333	1.2665	-0.756565	0.0816777	1.297	1.456	1.3765	1.278	1.411	1.3445	1.592	1.917	1.7545	0.833034	0.039489	GO:0097159 organic cyclic compound binding; GO:1901363 heterocyclic compound binding; GO:0046914 transition metal ion binding; GO:0005488 binding; GO:0003676 nucleic acid binding; GO:0043167 ion binding; GO:0046872 metal ion binding; GO:0043169 cation binding; GO:0008270 zinc ion binding;
O35215	IPI00230034	Ddt	DOPD	D-dopachrome decarboxylase	1.26	1.162	1.211	1.718	1.699	1.7085	1.893	1.925	1.909	0.825948	0.0428048	1.574	1.391	1.4825	1.412	1.368	1.39	1.268	1.249	1.2585	-0.832966	0.0395205
Q9D1D4	IPI00466570	Tmed10	TMEDA	Isoform 1 of Transmembrane emp24 domain-containing protein 10	0.717	0.748	0.7325	0.858	0.687	0.7725	0.662	0.474	0.568	-0.718604	0.107635	0.94	0.97	0.955	1.011	0.817	0.914	0.757	0.76	0.7585	-0.830645	0.0405932
Q3THE6	IPI00608020	Ftl1	FRIL1	ferritin light chain 1	1.007	1.049	1.028	1.066	1.184	1.125	0.457	0.535	0.496	-0.939065	0.00545654	1.132	1.113	1.1225	0.816	0.824	0.82	1.51	1.662	1.586	0.830358	0.0407266	GO:0043169 cation binding; GO:0046872 metal ion binding; GO:0005506 iron ion binding; GO:0008199 ferric iron binding; GO:0046914 transition metal ion binding; GO:0005488 binding; GO:0043167 ion binding;
Q60605	IPI00354819	Myl6	MYL6	Isoform Smooth muscle of Myosin light polypeptide 6	1.744	1.641	1.6925	1.164	1.077	1.1205	1.014	1.047	1.0305	-0.7262	0.102187	1.171	1.191	1.181	1.221	1.336	1.2785	0.998	1.003	1.0005	-0.829823	0.0409763	GO:0043169 cation binding; GO:0046872 metal ion binding; GO:0005509 calcium ion binding; GO:0005488 binding; GO:0043167 ion binding;
Q61233	IPI00118892	Lcp1	PLSL	Plastin-2	1.806	1.676	1.741	1.059	1.037	1.048	1.127	1.133	1.13	-0.550947	0.257197	1.062	1.111	1.0865	1.111	1.14	1.1255	1.152	1.199	1.1755	0.829746	0.041012	GO:0043169 cation binding; GO:0046872 metal ion binding; GO:0005515 protein binding; GO:0005509 calcium ion binding; GO:0005488 binding; GO:0043167 ion binding;
P62908	IPI00134599	Rps3	RS3	40S ribosomal protein S3	0.741	0.648	0.6945	0.572	0.584	0.578	0.47	0.696	0.583	-0.370947	0.469101	0.738	0.852	0.795	0.68	0.745	0.7125	0.454	0.642	0.548	-0.829658	0.0410534	GO:0097159 organic cyclic compound binding; GO:1901363 heterocyclic compound binding; GO:0003723 RNA binding; GO:0005488 binding; GO:0003676 nucleic acid binding; GO:0005198 structural molecule activity; GO:0003735 structural constituent of ribosome;
Q99JR1	IPI00115454	Sfxn1	SFXN1	Sideroflexin-1	0.745	0.695	0.72	0.688	0.718	0.703	0.638	0.631	0.6345	-0.908812	0.0120937	0.852	0.893	0.8725	0.59	0.611	0.6005	0.453	0.518	0.4855	-0.828033	0.041816	GO:0022892 substrate-specific transporter activity; GO:0015075 ion transmembrane transporter activity; GO:0005215 transporter activity; GO:0022857 transmembrane transporter activity; GO:0022891 substrate-specific transmembrane transporter activity;
P50136	IPI00331555	Bckdha	ODBA	2-oxoisovalerate dehydrogenase subunit alpha	0.828	0.791	0.8095	0.723	0.842	0.7825	0.585	0.663	0.624	-0.887055	0.0184145	0.844	0.972	0.908	0.914	1.009	0.9615	0.71	0.755	0.7325	-0.827976	0.0418433	GO:0003824 catalytic activity; GO:0016624 oxidoreductase activity, acting on the aldehyde or oxo group of donors, disulfide as acceptor; GO:0016491 oxidoreductase activity; GO:0016903 oxidoreductase activity, acting on the aldehyde or oxo group of donors;
P49962	IPI00230420	Srp9	SRP09	Signal recognition particle 9 kDa protein	1.701	1.666	1.6835	1.62	1.649	1.6345	1.627	1.761	1.694	0.264568	0.612407	1.327	1.396	1.3615	1.382	1.53	1.456	0.998	1.183	1.0905	-0.827682	0.0419817	GO:0097159 organic cyclic compound binding; GO:1901363 heterocyclic compound binding; GO:0003723 RNA binding; GO:0005488 binding; GO:0008312 7S RNA binding; GO:0003676 nucleic acid binding;
P23589	IPI00133663	Car5a	CAH5A	Carbonic anhydrase 5A	0.758	0.782	0.77	0.803	0.849	0.826	0.301	0.274	0.2875	-0.96193	0.00214637	0.946	0.931	0.9385	0.638	0.624	0.631	0.494	0.524	0.509	-0.826992	0.0423086	GO:0046914 transition metal ion binding; GO:0003824 catalytic activity; GO:0005488 binding; GO:0043167 ion binding; GO:0046872 metal ion binding; GO:0043169 cation binding; GO:0016829 lyase activity; GO:0016836 hydro-lyase activity; GO:0004089 carbonate dehydratase activity; GO:0008270 zinc ion binding; GO:0016835 carbon-oxygen lyase activity;
Q9CR57	IPI00133185	Rpl14	RL14	60S ribosomal protein L14	0.711	0.712	0.7115	0.632	0.638	0.635	0.591	0.625	0.608	-0.793824	0.0593808	0.86	0.862	0.861	0.717	0.72	0.7185	0.62	0.687	0.6535	-0.825507	0.0430152	GO:0003735 structural constituent of ribosome; GO:0005198 structural molecule activity;
Q9ET01	IPI00319525	Pygl	PYGL	Glycogen phosphorylase, liver form	0.53	0.365	0.4475	0.586	0.349	0.4675	0.306	0.171	0.2385	-0.723849	0.10386	0.804	0.594	0.699	0.781	0.721	0.751	0.506	0.268	0.387	-0.824847	0.0433311	GO:0097159 organic cyclic compound binding; GO:1901363 heterocyclic compound binding; GO:0016758 transferase activity, transferring hexosyl groups; GO:0003824 catalytic activity; GO:0005488 binding; GO:0043167 ion binding; GO:0004645 phosphorylase activity; GO:0043168 anion binding; GO:0016757 transferase activity, transferring glycosyl groups; GO:0048037 cofactor binding; GO:0016740 transferase …
Q6PB66	IPI00420706	Lrpprc	LPPRC	Leucine-rich PPR motif-containing protein	0.873	0.746	0.8095	0.849	0.745	0.797	0.788	0.812	0.8	-0.0495901	0.925676	0.804	0.817	0.8105	0.98	1.048	1.014	0.521	0.516	0.5185	-0.824584	0.0434574	GO:0005515 protein binding; GO:0005488 binding;
O08601	IPI00309073	Mttp	MTP	Isoform 1 of Microsomal triglyceride transfer protein large subunit	0.576	0.597	0.5865	0.648	0.684	0.666	0.953	1.07	1.0115	0.981628	0.000503202	0.902	0.906	0.904	0.975	0.972	0.9735	0.675	0.812	0.7435	-0.823655	0.0439046	GO:0005319 lipid transporter activity; GO:0022892 substrate-specific transporter activity; GO:0005215 transporter activity;
Q9DC61	IPI00120199	Pmpca	MPPA	Mitochondrial-processing peptidase subunit alpha	0.791	0.826	0.8085	0.836	0.822	0.829	0.541	0.606	0.5735	-0.953428	0.00320287	0.85	0.906	0.878	0.989	0.901	0.945	0.996	1.039	1.0175	0.822001	0.0447054	GO:0004175 endopeptidase activity; GO:0004222 metalloendopeptidase activity; GO:0008233 peptidase activity; GO:0003824 catalytic activity; GO:0005488 binding; GO:0043167 ion binding; GO:0070011 peptidase activity, acting on L-amino acid peptides; GO:0043169 cation binding; GO:0046872 metal ion binding; GO:0008237 metallopeptidase activity; GO:0016787 hydrolase activity;
Q8BUV3	IPI00225670	Gphn	GEPH	Gephyrin	0.888	0.855	0.8715	0.741	0.798	0.7695	0.467	0.572	0.5195	-0.965856	0.00172879	1.15	1.165	1.1575	1.195	1.302	1.2485	0.684	0.987	0.8355	-0.821003	0.0451921
Q9WUR2	IPI00322931	Peci	ECI2	Isoform 2 of Enoyl-CoA delta isomerase 2	0.889	0.917	0.903	1.265	1.468	1.3665	1.405	1.663	1.534	0.769541	0.0735468	1.013	1.079	1.046	1.57	1.527	1.5485	1.646	1.923	1.7845	0.820217	0.0455772	GO:0000062 fatty-acyl-CoA binding; GO:0003824 catalytic activity; GO:0005488 binding; GO:0043167 ion binding; GO:0043168 anion binding; GO:0048037 cofactor binding; GO:1901681 sulfur compound binding; GO:0050662 coenzyme binding;
P24472	IPI00323911	Gsta4	GSTA4	Glutathione S-transferase A4	1.589	1.489	1.539	1.266	1.442	1.354		0.971	0.971	-0.938707	0.0180473	1.151	1.102	1.1265	1.062	1.22	1.141	0.862	0.998	0.93	-0.818233	0.0465562	GO:0004364 glutathione transferase activity; GO:0016765 transferase activity, transferring alkyl or aryl (other than methyl) groups; GO:0005515 protein binding; GO:0003824 catalytic activity; GO:0016740 transferase activity; GO:0005488 binding;
Q80UM7	IPI00330323	Mogs	MOGS	Mannosyl-oligosaccharide glucosidase	0.612	0.597	0.6045	0.6	0.538	0.569	0.479	0.599	0.539	-0.51947	0.290884	0.881	0.93	0.9055	0.628	0.764	0.696	0.349	0.639	0.494	-0.817473	0.0469337	GO:0003824 catalytic activity;
Q62093	IPI00121135	Srsf2	SRSF2	Serine/arginine-rich splicing factor 2	2.412	2.187	2.2995	2.21	2.084	2.147	1.603	1.668	1.6355	-0.96425	0.00189421	1.155	1.193	1.174	0.982	0.999	0.9905	0.874	0.95	0.912	-0.816848	0.0472452	GO:0097159 organic cyclic compound binding; GO:1901363 heterocyclic compound binding; GO:1901265 nucleoside phosphate binding; GO:0005488 binding; GO:0003676 nucleic acid binding; GO:0000166 nucleotide binding; GO:0036094 small molecule binding;
Q9CR21	IPI00133006	Ndufab1	ACP	Acyl carrier protein	1.699	1.472	1.5855	1.662	1.325	1.4935	1.494	1.568	1.531	-0.0833702	0.875234	1.223	1.843	1.533	1.532	1.684	1.608	1.046	0.727	0.8865	-0.81365	0.0488537
P59242	IPI00896731	Cgn	CING	cingulin	1.483	1.532	1.5075	1.522	1.454	1.488	0.835	0.878	0.8565	-0.98523	0.000325624	1.24	1.265	1.2525	1.224	1.201	1.2125	1.161	1.201	1.181	-0.811303	0.0500505	GO:0003774 motor activity; GO:0016462 pyrophosphatase activity; GO:0003824 catalytic activity; GO:0016817 hydrolase activity, acting on acid anhydrides; GO:0016787 hydrolase activity; GO:0016818 hydrolase activity, acting on acid anhydrides, in phosphorus-containing anhydrides; GO:0017111 nucleoside-triphosphatase activity;
Q9R092	IPI00127016	Hsd17b6	H17B6	17-beta-hydroxysteroid dehydrogenase type 6	0.447	0.419	0.433	0.331	0.47	0.4005	0.309	0.469	0.389	-0.235385	0.653444	1.232	1.158	1.195	0.52	0.645	0.5825	0.294	0.42	0.357	-0.809319	0.0510725	GO:0003824 catalytic activity; GO:0016491 oxidoreductase activity;
Q9JIX8	IPI00121136	Acin1	Acinus	Isoform 1 of Apoptotic chromatin condensation inducer in the nucleus	1.537	1.471	1.504	1.206	1.28	1.243	0.979	1.027	1.003	-0.919683	0.00941728	1.148	1.409	1.2785	1.201	1.063	1.132	0.943	0.958	0.9505	-0.808852	0.0513144	GO:0097159 organic cyclic compound binding; GO:1901363 heterocyclic compound binding; GO:1901265 nucleoside phosphate binding; GO:0005488 binding; GO:0003676 nucleic acid binding; GO:0000166 nucleotide binding; GO:0036094 small molecule binding;
Q99MN9	IPI00606510	Pccb	PCCB	Propionyl-CoA carboxylase beta chain	0.805	0.764	0.7845	0.69	0.759	0.7245	0.513	0.478	0.4955	-0.979718	0.000612876	0.878	0.869	0.8735	0.909	0.93	0.9195	0.72	0.818	0.769	-0.806999	0.0522796	GO:0003824 catalytic activity; GO:0016874 ligase activity;
Q3UHX2	IPI00352475	Pdap1	HAP28	28 kDa heat- and acid-stable phosphoprotein	1.758	1.859	1.8085	1.826	1.881	1.8535	1.737	1.766	1.7515	-0.625099	0.18448	1.265	1.226	1.2455	1.55	1.63	1.59	1.669	1.769	1.719	0.806336	0.0526267
P97371	IPI00124223	Psme1	PSME1	Proteasome activator complex subunit 1	2.056	1.936	1.996	1.557	1.508	1.5325	1.292	1.442	1.367	-0.797286	0.0574746	1.158	1.139	1.1485	1.044	1.107	1.0755	1.236	1.318	1.277	0.806221	0.0526872
P34914	IPI00321617	Ephx2	HYES	Isoform 1 of Epoxide hydrolase 2	0.73	0.706	0.718	1.141	1.017	1.079	1.553	1.85	1.7015	0.955671	0.00290403	1.055	1.069	1.062	1.209	1.262	1.2355	1.503	1.259	1.381	0.805524	0.0530539	GO:0016787 hydrolase activity; GO:0003824 catalytic activity;
Q60759	IPI00120233	Gcdh	GCDH	Glutaryl-CoA dehydrogenase	0.778	0.828	0.803	0.737	0.785	0.761	0.483	0.562	0.5225	-0.970573	0.00128619	0.813	0.835	0.824	0.936	0.906	0.921	0.624	0.723	0.6735	-0.804966	0.053348	GO:1901265 nucleoside phosphate binding; GO:0050660 flavin adenine dinucleotide binding; GO:0043167 ion binding; GO:0000166 nucleotide binding; GO:0048037 cofactor binding; GO:0016491 oxidoreductase activity; GO:0016627 oxidoreductase activity, acting on the CH-CH group of donors; GO:1901363 heterocyclic compound binding; GO:0097159 organic cyclic compound binding; GO:0003824 catalytic activity; …
D3YU37	IPI00118775	Gm6570	D3YU37	Uncharacterized protein	0.674	1.056	0.865	0.641		0.641	0.69	1.281	0.9855	0.323923	0.594899	1.008	1.209	1.1085	0.765	0.927	0.846	0.554	0.759	0.6565	-0.803639	0.0540508	GO:0003735 structural constituent of ribosome; GO:0005198 structural molecule activity;
Q9CPQ9	IPI00856272	Aldoart1	ALDOA	aldolase 1 A retrogene 1	0.82	0.763	0.7915	0.739	0.761	0.75	0.423	0.53	0.4765	-0.967797	0.00153885	0.955	0.992	0.9735	0.849	0.834	0.8415	0.696	0.828	0.762	-0.801591	0.055144	GO:0016829 lyase activity; GO:0004332 fructose-bisphosphate aldolase activity; GO:0016832 aldehyde-lyase activity; GO:0003824 catalytic activity; GO:0016830 carbon-carbon lyase activity;
Q64213	IPI00116284	Sf1	SF01	Isoform CW17 of Splicing factor 1	1.487	1.501	1.494	1.513	1.51	1.5115	1.28	1.672	1.476	-0.0980065	0.853461	1.187	1.133	1.16	1.018	1.251	1.1345	1.526	2.521	2.0235	0.797493	0.0573615	GO:0097159 organic cyclic compound binding; GO:1901363 heterocyclic compound binding; GO:0003723 RNA binding; GO:0046914 transition metal ion binding; GO:0005488 binding; GO:0043167 ion binding; GO:0003676 nucleic acid binding; GO:0046872 metal ion binding; GO:0043169 cation binding; GO:0008270 zinc ion binding;
Q9D6S7	IPI00109501	Mrrf	RRFM	Ribosome-recycling factor	1.81	1.685	1.7475	1.737	1.638	1.6875	1.224	1.34	1.282	-0.962689	0.00206225	1.261	1.314	1.2875	1.657	1.363	1.51	0.878	0.961	0.9195	-0.797379	0.0574235
Q9Z2I9	IPI00261627	Sucla2	SUCB1	Succinyl-CoA ligase [ADP-forming] subunit beta	0.827	0.776	0.8015	0.799	0.765	0.782	0.562	0.538	0.55	-0.981153	0.00052949	0.857	1.093	0.975	0.908	0.954	0.931	0.691	0.799	0.745	-0.794868	0.0588026	GO:0005524 ATP binding; GO:1901265 nucleoside phosphate binding; GO:0001882 nucleoside binding; GO:0043167 ion binding; GO:0000166 nucleotide binding; GO:0097159 organic cyclic compound binding; GO:1901363 heterocyclic compound binding; GO:0032549 ribonucleoside binding; GO:0097367 carbohydrate derivative binding; GO:0003824 catalytic activity; GO:0032553 ribonucleotide binding; GO:0005488 bindin…
Q9DCH6	IPI00120917	Zfand6	ZFAN6	AN1-type zinc finger protein 6	1.742	1.755	1.7485	1.45	1.511	1.4805	1.471	1.682	1.5765	-0.285827	0.582935	1.272	1.235	1.2535	1.417	1.434	1.4255	0.971	1.089	1.03	-0.793334	0.0596531	GO:0097159 organic cyclic compound binding; GO:1901363 heterocyclic compound binding; GO:0003677 DNA binding; GO:0046914 transition metal ion binding; GO:0005488 binding; GO:0043167 ion binding; GO:0003676 nucleic acid binding; GO:0046872 metal ion binding; GO:0043169 cation binding; GO:0008270 zinc ion binding;
Q8C1Y3	IPI00404590	H1f0	H10	Putative uncharacterized protein	1.164	1.226	1.195	1.9	2.126	2.013	0.918	1.058	0.988	-0.508152	0.303379	1.423	1.366	1.3945	1.012	1.036	1.024	0.852	0.956	0.904	-0.7929	0.0598941	GO:0097159 organic cyclic compound binding; GO:1901363 heterocyclic compound binding; GO:0003677 DNA binding; GO:0005488 binding; GO:0003676 nucleic acid binding;
Q8CC88	IPI00850133	1300010F03Rik	VWA8	Isoform 1 of Uncharacterized protein KIAA0564 homolog	0.806	0.809	0.8075	1.114	1.139	1.1265	1.884	1.936	1.91	0.993136	7.05037e-05	1.373	1.243	1.308	2.02	1.763	1.8915	2.032	2.195	2.1135	0.792477	0.0601299	GO:0005524 ATP binding; GO:1901265 nucleoside phosphate binding; GO:0001882 nucleoside binding; GO:0043167 ion binding; GO:0016817 hydrolase activity, acting on acid anhydrides; GO:0016787 hydrolase activity; GO:0000166 nucleotide binding; GO:0017111 nucleoside-triphosphatase activity; GO:0016887 ATPase activity; GO:0097159 organic cyclic compound binding; GO:1901363 heterocyclic compound binding…
GM10145	IPI00116718	Gm10145	GM10145	ubiquitin-conjugating enzyme E2 L3-like	1.002	1.358	1.18	1.356	1.11	1.233	1.189	1.357	1.273	0.248448	0.634995	2.262	2.37	2.316	1.18	0.906	1.043	0.638	0.672	0.655	-0.791171	0.0608607
O88587	IPI00759876	Comt1	COMT	catechol O-methyltransferase	0.854	0.759	0.8065	0.739	0.716	0.7275	0.593	0.629	0.611	-0.909673	0.0118699	0.744	0.769	0.7565	0.83	0.913	0.8715	0.57	0.631	0.6005	-0.790279	0.0613622	GO:0000287 magnesium ion binding; GO:0008757 S-adenosylmethionine-dependent methyltransferase activity; GO:0008168 methyltransferase activity; GO:0016206 catechol O-methyltransferase activity; GO:0003824 catalytic activity; GO:0005488 binding; GO:0043167 ion binding; GO:0046872 metal ion binding; GO:0043169 cation binding; GO:0016741 transferase activity, transferring one-carbon groups; GO:000817…
P47955	IPI00113377	Rplp1	RLA1	60S acidic ribosomal protein P1	1.409	1.996	1.7025	1.43	1.85	1.64	1.16	1.571	1.3655	-0.521048	0.289158	0.987	1.135	1.061	1.109	1.217	1.163	1.299	1.904	1.6015	0.789165	0.061991	GO:0003735 structural constituent of ribosome; GO:0005198 structural molecule activity;
Q8BRJ7	IPI00458508	Gda	GUAD	Putative uncharacterized protein	0.825	0.761	0.793	0.593	0.59	0.5915	0.438	0.489	0.4635	-0.874599	0.0226023	0.793	0.788	0.7905	0.832	0.8	0.816	0.71	0.76	0.735	-0.788005	0.0626493	GO:0016787 hydrolase activity; GO:0003824 catalytic activity; GO:0016810 hydrolase activity, acting on carbon-nitrogen (but not peptide) bonds;
Q8R2K1	IPI00654058	1810014F10Rik	FUCM	Isoform 5 of Fucose mutarotase	0.981	0.97	0.9755	1.004	0.906	0.955	1.098	1.121	1.1095	0.87982	0.020797	0.925	1.294	1.1095	0.978	0.975	0.9765	1.366	1.705	1.5355	0.786425	0.0635504	GO:0030246 carbohydrate binding; GO:0016853 isomerase activity; GO:0048029 monosaccharide binding; GO:0003824 catalytic activity; GO:0005488 binding; GO:0036094 small molecule binding;
Q9CZA6	IPI00112460	Nde1	NDE1	Isoform 1 of Nuclear distribution protein nudE homolog 1	1.723	1.758	1.7405	1.615	1.642	1.6285	1.236	1.553	1.3945	-0.832528	0.0397217	1.276	1.376	1.326	1.256	1.196	1.226	1.198	1.046	1.122	-0.785685	0.0639746
O08573	IPI00114396	Lgals9	LEG9	Isoform Long of Galectin-9	0.635	0.721	0.678	0.554	0.672	0.613	0.542	0.613	0.5775	-0.576809	0.230741	0.88	0.932	0.906	0.722	0.785	0.7535	0.557	0.744	0.6505	-0.780773	0.0668225	GO:0030246 carbohydrate binding; GO:0005488 binding;
P43883	IPI00125653	Plin2	PLIN2	Perilipin-2	0.758	0.726	0.742	0.332	0.313	0.3225	0.307	0.285	0.296	-0.680351	0.136933	1.592	1.773	1.6825	0.797	0.805	0.801	0.562	0.564	0.563	-0.778845	0.0679558
O70400	IPI00309768	Pdlim1	PDLI1	PDZ and LIM domain protein 1	1.769	1.622	1.6955	1.656	1.526	1.591	1.962	2.052	2.007	0.862158	0.0271911	1.482	1.466	1.474	1.025	1.034	1.0295	2.142	1.84	1.991	0.775051	0.0702115	GO:0043169 cation binding; GO:0046872 metal ion binding; GO:0005515 protein binding; GO:0008270 zinc ion binding; GO:0046914 transition metal ion binding; GO:0005488 binding; GO:0043167 ion binding;
Q9JI95	IPI00120045	Cpn10-rs1	Hsp10	MCG8024	1.797	1.492	1.6445	1.914	1.643	1.7785	1.85	1.773	1.8115	0.399275	0.432914	1.267	1.16	1.2135	1.466	1.389	1.4275	1.548	1.468	1.508	0.773696	0.0710256
Q66JS6	IPI00471443	Eif3j	EI3JB	Eukaryotic translation initiation factor 3 subunit J	1.765	1.639	1.702	1.636	1.56	1.598	1.647	1.7	1.6735	0.0569716	0.914635	1.211	1.077	1.144	1.368	1.399	1.3835	0.87	0.886	0.878	-0.77152	0.0723411	GO:0097159 organic cyclic compound binding; GO:1901363 heterocyclic compound binding; GO:0003723 RNA binding; GO:0008135 translation factor activity, RNA binding; GO:0005488 binding; GO:0003676 nucleic acid binding; GO:0003743 translation initiation factor activity;
Q8R317	IPI00280207	Ubqln1	UBQL1	Isoform 2 of Ubiquilin-1	1.635	1.55	1.5925	1.513	1.587	1.55	1.573	1.941	1.757	0.584175	0.223416	1.257	1.374	1.3155	1.222	1.423	1.3225	1.018	1.179	1.0985	-0.770674	0.0728555	GO:0005515 protein binding; GO:0005488 binding;
P70333	IPI00108143	Hnrnph2	HNRH2	Heterogeneous nuclear ribonucleoprotein H2	1.182	1.134	1.158	0.797	0.886	0.8415	0.888	0.852	0.87	-0.564274	0.243423	1.294	1.168	1.231	1.161	1.16	1.1605	1.346	1.706	1.526	0.769444	0.0736061	GO:0097159 organic cyclic compound binding; GO:1901363 heterocyclic compound binding; GO:1901265 nucleoside phosphate binding; GO:0005488 binding; GO:0003676 nucleic acid binding; GO:0000166 nucleotide binding; GO:0036094 small molecule binding;
P28474	IPI00555004	Adh5	ADHX	Alcohol dehydrogenase class-3	0.583		0.583	0.52	0.348	0.434	0.415		0.415	-0.449938	0.550062	0.763	1.093	0.928	0.835	0.691	0.763		0.413	0.413	-0.841517	0.0739099	GO:0016614 oxidoreductase activity, acting on CH-OH group of donors; GO:0016616 oxidoreductase activity, acting on the CH-OH group of donors, NAD or NADP as acceptor; GO:0046914 transition metal ion binding; GO:0003824 catalytic activity; GO:0005488 binding; GO:0043167 ion binding; GO:0046872 metal ion binding; GO:0043169 cation binding; GO:0008270 zinc ion binding; GO:0051903 S-(hydroxymethyl)gl…
Q9QXS1	IPI00229509	Plec	PLEC	plectin isoform 1b2alpha	1.578	1.591	1.5845	1.275	1.372	1.3235	1.09	1.206	1.148	-0.869235	0.0245313	1.212	1.22	1.216	1.033	1.034	1.0335	1.354	1.493	1.4235	0.765995	0.0757307	GO:0005515 protein binding; GO:0005488 binding;
P50172	IPI00115599	Hsd11b1	DHI1	Corticosteroid 11-beta-dehydrogenase isozyme 1	0.546	0.527	0.5365	0.334	0.291	0.3125	0.208	0.261	0.2345	-0.802309	0.0547597	0.735	0.775	0.755	0.585	0.671	0.628	0.223	0.606	0.4145	-0.760593	0.0791127	GO:0003824 catalytic activity; GO:0016491 oxidoreductase activity;
P10648	IPI00116055	Gsta2	GSTA2	Glutathione S-transferase A2	1.492	1.496	1.494	1.45	1.488	1.469	1.574	1.673	1.6235	0.863493	0.0266793	1.18	1.128	1.154	1.333	1.38	1.3565	1.353	1.528	1.4405	0.759747	0.0796481	GO:0004364 glutathione transferase activity; GO:0016765 transferase activity, transferring alkyl or aryl (other than methyl) groups; GO:0005515 protein binding; GO:0003824 catalytic activity; GO:0016740 transferase activity; GO:0005488 binding;
P47199	IPI00134704	Cryz	QOR	Quinone oxidoreductase	0.727	0.617	0.672	0.689	0.652	0.6705	0.726	0.551	0.6385	-0.244784	0.640158	1.005	0.948	0.9765	1.248	1.136	1.192	0.793	0.685	0.739	-0.759493	0.0798096	GO:0046914 transition metal ion binding; GO:0003824 catalytic activity; GO:0005488 binding; GO:0043167 ion binding; GO:0046872 metal ion binding; GO:0043169 cation binding; GO:0008270 zinc ion binding; GO:0016491 oxidoreductase activity;
Q9EQH3	IPI00111181	Vps35	VPS35	Vacuolar protein sorting-associated protein 35	0.83	0.795	0.8125	0.775	0.702	0.7385	0.646	0.613	0.6295	-0.920767	0.00916818	0.947	0.972	0.9595	0.896	0.76	0.828	0.775	0.759	0.767	-0.7584	0.0805044	GO:0022892 substrate-specific transporter activity; GO:0008565 protein transporter activity; GO:0005488 binding; GO:0005215 transporter activity;
Q8BGQ7	IPI00321308	Aars	AlaRS	Alanyl-tRNA synthetase	0.756	0.709	0.7325	0.698	0.662	0.68	0.568	0.343	0.4555	-0.872835	0.0232283	0.922	0.958	0.94	0.851	0.952	0.9015	0.868	0.722	0.795	-0.75814	0.0806704	GO:0016876 ligase activity, forming aminoacyl-tRNA and related compounds; GO:0005524 ATP binding; GO:1901265 nucleoside phosphate binding; GO:0016875 ligase activity, forming carbon-oxygen bonds; GO:0001882 nucleoside binding; GO:0043167 ion binding; GO:0016874 ligase activity; GO:0000166 nucleotide binding; GO:0097159 organic cyclic compound binding; GO:1901363 heterocyclic compound binding; GO:…
Q6IRU5	IPI00228978	Cltb	CLCB	Isoform 1 of Clathrin light chain B	1.851	1.814	1.8325	1.644	1.711	1.6775	1.723	1.934	1.8285	0.239372	0.6478	1.29	1.27	1.28	1.36	1.342	1.351	1.207	1.214	1.2105	-0.755446	0.0823967	GO:0005198 structural molecule activity;
Q9D051	IPI00132042	Pdhb	ODPB	Pyruvate dehydrogenase E1 component subunit beta	0.464	0.494	0.479	0.579	0.591	0.585	0.475	0.587	0.531	0.127719	0.809463	0.874	0.84	0.857	0.926	0.836	0.881	0.757	0.801	0.779	-0.753966	0.0833526	GO:0003824 catalytic activity;
Q05186	IPI00137831	Rcn1	RCN1	Reticulocalbin-1	1.814	1.799	1.8065	1.195	1.128	1.1615	1.087	1.142	1.1145	-0.685115	0.133118	1.19	1.197	1.1935	1.106	1.034	1.07	0.948	1.071	1.0095	-0.752902	0.0840424	GO:0043169 cation binding; GO:0046872 metal ion binding; GO:0005509 calcium ion binding; GO:0005488 binding; GO:0043167 ion binding;
Q9EP89	IPI00109293	Lactb	LACTB	Serine beta-lactamase-like protein LACTB	0.75	0.737	0.7435	0.477	0.486	0.4815	0.362	0.394	0.378	-0.825999	0.0427806	0.726	0.78	0.753	1.215	1.167	1.191	0.343	0.349	0.346	-0.751631	0.0848704
Q8CHT0	IPI00405699	Aldh4a1	AL4A1	Delta-1-pyrroline-5-carboxylate dehydrogenase	0.626	0.829	0.7275	0.642	0.865	0.7535	0.792	0.545	0.6685	-0.267776	0.607936	1.414	1.109	1.2615	0.531	0.985	0.758	0.411	0.62	0.5155	-0.749106	0.0865248	GO:0016620 oxidoreductase activity, acting on the aldehyde or oxo group of donors, NAD or NADP as acceptor; GO:0016645 oxidoreductase activity, acting on the CH-NH group of donors; GO:0016646 oxidoreductase activity, acting on the CH-NH group of donors, NAD or NADP as acceptor; GO:0003824 catalytic activity; GO:0016903 oxidoreductase activity, acting on the aldehyde or oxo group of donors; GO:001…
P62307	IPI00943994	Snrpf	RUXF	Small nuclear ribonucleoprotein F	1.331	1.529	1.43	1.071	1.27	1.1705	0.911	1.214	1.0625	-0.660059	0.153698	1.064	1.331	1.1975	0.845	0.934	0.8895	1.431	2.108	1.7695	0.748164	0.0871461
Q9CQ19	IPI00750595	Myl9	MYL9	Myosin regulatory light polypeptide 9	1.445	1.183	1.314	1.407	1.001	1.204	1.094	0.999	1.0465	-0.592497	0.215253	1.065	1.042	1.0535	1.525	1.672	1.5985	0.669	0.348	0.5085	-0.747345	0.0876881	GO:0043169 cation binding; GO:0046872 metal ion binding; GO:0005509 calcium ion binding; GO:0005488 binding; GO:0043167 ion binding;
Q91WL5	IPI00350781	Cyp4a12a	CYPIVA12	Cytochrome P450 4A12A	1.101		1.101	2.648		2.648	14.054		14.054	0.997963	0.0406374	0.843	0.85	0.8465	1.115	1.077	1.096	0.587	0.647	0.617	-0.746953	0.0879473	GO:0097159 organic cyclic compound binding; GO:1901363 heterocyclic compound binding; GO:0020037 heme binding; GO:0005506 iron ion binding; GO:0046914 transition metal ion binding; GO:0003824 catalytic activity; GO:0005488 binding; GO:0043167 ion binding; GO:0043169 cation binding; GO:0046872 metal ion binding; GO:0016705 oxidoreductase activity, acting on paired donors, with incorporation or red…
B1AV77	IPI00111235	Aldh3a2	AL3A2	Aldehyde dehydrogenase	0.691	0.675	0.683	1.178	1.215	1.1965	1.88	2.046	1.963	0.9679	0.00152908	1.063	1.042	1.0525	1.966	2.104	2.035	2.078	2.411	2.2445	0.744536	0.0895569	GO:0016620 oxidoreductase activity, acting on the aldehyde or oxo group of donors, NAD or NADP as acceptor; GO:0003824 catalytic activity; GO:0004030 aldehyde dehydrogenase [NAD(P)+] activity; GO:0016491 oxidoreductase activity; GO:0016903 oxidoreductase activity, acting on the aldehyde or oxo group of donors;
Q91V76	IPI00126172	4931406C07Rik	CK054	Ester hydrolase C11orf54 homolog	0.649	0.683	0.666	0.768	0.853	0.8105	0.818	0.853	0.8355	0.692641	0.127187	1.049	0.995	1.022	1.173	1.293	1.233	0.729	0.868	0.7985	-0.742168	0.0911459
Q3TIE8	IPI00331564	Dld	DLDH	Dihydrolipoyl dehydrogenase	0.854	0.863	0.8585	0.853	0.921	0.887	0.604	0.706	0.655	-0.907278	0.0124974	1.018	1.033	1.0255	0.999	1.103	1.051	0.674	0.958	0.816	-0.741005	0.0919311	GO:0004148 dihydrolipoyl dehydrogenase activity; GO:0016651 oxidoreductase activity, acting on NAD(P)H; GO:1901265 nucleoside phosphate binding; GO:0050660 flavin adenine dinucleotide binding; GO:0043167 ion binding; GO:0000166 nucleotide binding; GO:0048037 cofactor binding; GO:0016668 oxidoreductase activity, acting on a sulfur group of donors, NAD(P) as acceptor; GO:0016491 oxidoreductase acti…
O54988	IPI00331076	Slk	SLK	Isoform 1 of STE20-like serine/threonine-protein kinase	1.596	1.578	1.587	1.319	1.385	1.352	1.094	1.325	1.2095	-0.805254	0.0531958	1.739	1.448	1.5935	1.45	1.384	1.417	1.922	1.791	1.8565	0.73996	0.0926394	GO:0005524 ATP binding; GO:1901265 nucleoside phosphate binding; GO:0016773 phosphotransferase activity, alcohol group as acceptor; GO:0001882 nucleoside binding; GO:0043167 ion binding; GO:0005515 protein binding; GO:0004672 protein kinase activity; GO:0000166 nucleotide binding; GO:0097159 organic cyclic compound binding; GO:1901363 heterocyclic compound binding; GO:0032549 ribonucleoside bindi…
P70670	IPI00111831	Naca	NACAM	Nascent polypeptide-associated complex subunit alpha	1.178	1.145	1.1615	0.931	0.951	0.941	1.103	1.272	1.1875	0.393274	0.440501	1.204	1.231	1.2175	1.464	1.561	1.5125	0.818	1.026	0.922	-0.739307	0.0930831
Q8R1F5	IPI00153368	Hyi	HYI	Putative hydroxypyruvate isomerase	0.997	1.003	1	1.203	1.21	1.2065	0.531	0.648	0.5895	-0.866014	0.0257258	0.823	0.882	0.8525	0.971	1.173	1.072	1.115	1.202	1.1585	0.737096	0.0945919
Q9DAW9	IPI00119111	Cnn3	CNN3	Calponin-3	1.521	1.942	1.7315	1.291	1.948	1.6195	0.88	1.31	1.095	-0.73334	0.0971807	1.163	1.267	1.215	1.294	1.331	1.3125	0.761	1.131	0.946	-0.736887	0.0947355	GO:0003779 actin binding; GO:0005515 protein binding; GO:0008092 cytoskeletal protein binding; GO:0005488 binding;
P46938	IPI00108989	Yap1	YAP1	Isoform 1 of Yorkie homolog	1.852	1.818	1.835	1.797	1.845	1.821	1.385	1.663	1.524	-0.860324	0.0279017	1.334	1.407	1.3705	1.429	1.381	1.405	1.11	1.322	1.216	-0.732735	0.0976004	GO:0005515 protein binding; GO:0005488 binding;
Q9JHU4	IPI00119876	Dync1h1	DYHC1	Cytoplasmic dynein 1 heavy chain 1	0.835	0.68	0.7575	0.707	0.563	0.635	0.743	0.616	0.6795	-0.187723	0.721724	1.054	0.909	0.9815	0.945	0.995	0.97	0.905	0.803	0.854	-0.731598	0.0983917	GO:0005524 ATP binding; GO:0003774 motor activity; GO:1901265 nucleoside phosphate binding; GO:0001882 nucleoside binding; GO:0043167 ion binding; GO:0016817 hydrolase activity, acting on acid anhydrides; GO:0016787 hydrolase activity; GO:0000166 nucleotide binding; GO:0017111 nucleoside-triphosphatase activity; GO:0016887 ATPase activity; GO:0097159 organic cyclic compound binding; GO:1901363 he…
Q80X19	IPI00330632	Col14a1	COEA1	Isoform 1 of Collagen alpha-1(XIV) chain	1.834	1.785	1.8095	1.27	1.294	1.282	0.771	0.96	0.8655	-0.904188	0.0133302	1.155	1.336	1.2455	0.955	1.068	1.0115	1.415	1.604	1.5095	0.731084	0.0987506	GO:0005515 protein binding; GO:0005488 binding;
Q9WTP7	IPI00221769	Ak3	KAD3	GTP:AMP phosphotransferase	0.943	0.883	0.913	0.851	0.795	0.823	0.673	0.669	0.671	-0.952886	0.00327729	0.828	0.808	0.818	1.274	1.313	1.2935	0.43	0.43	0.43	-0.727511	0.101259	GO:0005524 ATP binding; GO:1901265 nucleoside phosphate binding; GO:0004017 adenylate kinase activity; GO:0019205 nucleobase-containing compound kinase activity; GO:0001882 nucleoside binding; GO:0043167 ion binding; GO:0000166 nucleotide binding; GO:0019201 nucleotide kinase activity; GO:0016776 phosphotransferase activity, phosphate group as acceptor; GO:0097159 organic cyclic compound binding;…
Q3TIV5	IPI00336958	Zc3h15	ZC3HF	Isoform 1 of Zinc finger CCCH domain-containing protein 15	1.74	1.646	1.693	1.531	1.545	1.538	1.187	1.377	1.282	-0.91981	0.00938791	1.243	1.254	1.2485	1.232	1.334	1.283	1.313	1.56	1.4365	0.726866	0.101715	GO:0046872 metal ion binding; GO:0043169 cation binding; GO:0005488 binding; GO:0043167 ion binding;
P97450	IPI00125460	Atp5j	ATP5J	ATP synthase-coupling factor 6	1.225	1.342	1.2835	1.365	1.266	1.3155	1.065	1.428	1.2465	-0.190769	0.717318	1.005	0.962	0.9835	1.361	1.743	1.552	0.283	0.587	0.435	-0.725968	0.102351	GO:0015075 ion transmembrane transporter activity; GO:0022892 substrate-specific transporter activity; GO:0015077 monovalent inorganic cation transmembrane transporter activity; GO:0022890 inorganic cation transmembrane transporter activity; GO:0015078 hydrogen ion transmembrane transporter activity; GO:0008324 cation transmembrane transporter activity; GO:0022891 substrate-specific transmembrane…
Q9JHW2	IPI00119945	Nit2	NIT2	Omega-amidase NIT2	0.763	0.779	0.771	0.757	0.801	0.779	0.514	0.495	0.5045	-0.973918	0.00101151	0.891	0.839	0.865	1.049	1.029	1.039	0.723	0.72	0.7215	-0.724498	0.103396	GO:0016787 hydrolase activity; GO:0003824 catalytic activity; GO:0016810 hydrolase activity, acting on carbon-nitrogen (but not peptide) bonds;
Q61133	IPI00126680	Gstt2	GSTT2	glutathione S-transferase theta-2	0.695	0.732	0.7135	1.191	1.121	1.156	1.449	1.645	1.547	0.911944	0.0112895	1.214	1.184	1.199	1.28	1.302	1.291	2.122	1.346	1.734	0.721252	0.105721	GO:0005515 protein binding; GO:0005488 binding;
Q00724	IPI00122429	Rbp4	RET4	Retinol-binding protein 4	0.634	0.629	0.6315	0.602	0.604	0.603	0.812	0.894	0.853	0.940721	0.00516685	1.204	1.14	1.172	1.143	1.03	1.0865	1.233	1.507	1.37	0.716997	0.108803	GO:0008289 lipid binding; GO:0019840 isoprenoid binding; GO:0005488 binding; GO:0005215 transporter activity; GO:0005501 retinoid binding; GO:0036094 small molecule binding;
Q8R4N0	IPI00153903	Clybl	CLYBL	Citrate lyase subunit beta-like protein	0.648	0.746	0.697	0.602	0.738	0.67	0.718	0.863	0.7905	0.581179	0.226383	0.865	0.885	0.875	1.2	1.19	1.195	0.445	0.724	0.5845	-0.712119	0.112384	GO:0003824 catalytic activity;
P55302	IPI00469307	Lrpap1	AMRP	Alpha-2-macroglobulin receptor-associated protein	1.585	1.649	1.617	1.786	1.857	1.8215	1.309	1.535	1.422	-0.695168	0.125221	1.557	1.21	1.3835	1.604	1.339	1.4715	1.178	0.999	1.0885	-0.70979	0.114112	GO:0070325 lipoprotein particle receptor binding; GO:0097367 carbohydrate derivative binding; GO:0005102 receptor binding; GO:0005488 binding; GO:0043167 ion binding; GO:0005515 protein binding; GO:0043168 anion binding; GO:0005539 glycosaminoglycan binding; GO:0008201 heparin binding; GO:1901681 sulfur compound binding; GO:0050750 low-density lipoprotein particle receptor binding;
P15864	IPI00223713	Hist1h1c	H12	Histone H1.2	1.652	1.607	1.6295	1.594	1.645	1.6195	1.539	1.705	1.622	-0.0358959	0.946179	1.273	1.245	1.259	1.617	1.75	1.6835	1.686	1.805	1.7455	0.706991	0.116203	GO:0097159 organic cyclic compound binding; GO:1901363 heterocyclic compound binding; GO:0003677 DNA binding; GO:0005488 binding; GO:0003676 nucleic acid binding;
D3YZP9	IPI00381495	Ccdc6	CCDC6	Uncharacterized protein	1.563	1.595	1.579	1.401	1.497	1.449	1.237	1.171	1.204	-0.960854	0.00226863	1.159	1.282	1.2205	1.21	1.33	1.27	1.325	1.914	1.6195	0.706774	0.116366
Q9DBE0	IPI00119622	Csad	CSAD	Cysteine sulfinic acid decarboxylase	0.68	0.666	0.673	1.131	1.066	1.0985	2.18	2.32	2.25	0.993676	5.98565e-05	1.015	1.02	1.0175	0.855	0.806	0.8305	1.093	1.335	1.214	0.706131	0.116849	GO:0097159 organic cyclic compound binding; GO:1901363 heterocyclic compound binding; GO:0003824 catalytic activity; GO:0005488 binding; GO:0016830 carbon-carbon lyase activity; GO:0043167 ion binding; GO:0016831 carboxy-lyase activity; GO:0016829 lyase activity; GO:0043168 anion binding; GO:0048037 cofactor binding; GO:0030170 pyridoxal phosphate binding;
P08226	IPI00323571	Apoe	Apo-E	Apolipoprotein E	1.505	1.335	1.42	1.534	1.41	1.472	1.519	1.571	1.545	0.613549	0.19516	1.39	1.353	1.3715	1.379	1.365	1.372	1.394	1.557	1.4755	0.700497	0.12112	GO:0008289 lipid binding; GO:0005488 binding;
Q91X83	IPI00128518	Mat1a	METK1	S-adenosylmethionine synthase isoform type-1	0.735	0.651	0.693	0.604	0.576	0.59	0.581	0.485	0.533	-0.756423	0.081769	1.261	1.361	1.311	0.907	0.881	0.894	0.872	0.831	0.8515	-0.69555	0.124925	GO:0005524 ATP binding; GO:1901265 nucleoside phosphate binding; GO:0001882 nucleoside binding; GO:0043167 ion binding; GO:0000166 nucleotide binding; GO:0004478 methionine adenosyltransferase activity; GO:0097159 organic cyclic compound binding; GO:1901363 heterocyclic compound binding; GO:0032549 ribonucleoside binding; GO:0097367 carbohydrate derivative binding; GO:0003824 catalytic activity; …
Q80WJ7	IPI00330599	Mtdh	LYRIC	Protein LYRIC	1.771	1.512	1.6415	1.605	1.474	1.5395	1.52	1.582	1.551	-0.262978	0.614626	1.166	1.141	1.1535	1.349	1.347	1.348	1.313	1.462	1.3875	0.694281	0.125909
O35488	IPI00130924	Slc27a2	VLACS	Very long-chain acyl-CoA synthetase	0.637	0.603	0.62	0.656	0.593	0.6245	0.805	0.797	0.801	0.959752	0.00239723	0.948	0.969	0.9585	1.004	1.18	1.092	0.82	0.831	0.8255	-0.693001	0.126905	GO:0003824 catalytic activity;
Q9JI75	IPI00266614	Nqo2	NQO2	Ribosyldihydronicotinamide dehydrogenase [quinone]	0.676	0.691	0.6835	0.626	0.709	0.6675	0.489	0.507	0.498	-0.954342	0.00307943	0.719	0.765	0.742	0.917	0.879	0.898	0.591	0.66	0.6255	-0.691592	0.128006
Q9CSN1	IPI00317298	Snw1	SNW1	SNW domain-containing protein 1	1.627	1.385	1.506	1.487	1.299	1.393	0.995	1.066	1.0305	-0.911277	0.0114586	1.169	1.191	1.18	1.156	1.196	1.176	1.203	1.212	1.2075	0.691452	0.128115
P30115	IPI00331241	Gsta3	GSTA3	Glutathione S-transferase A3	1.747	1.485	1.616	1.567	1.311	1.439	0.875	0.96	0.9175	-0.936555	0.00591015	0.883	0.892	0.8875	1.281	1.267	1.274	1.314	1.296	1.305	0.691101	0.12839	GO:0004364 glutathione transferase activity; GO:0016765 transferase activity, transferring alkyl or aryl (other than methyl) groups; GO:0005515 protein binding; GO:0003824 catalytic activity; GO:0016740 transferase activity; GO:0005488 binding;
O54724	IPI00117689	Ptrf	PTRF	Polymerase I and transcript release factor	1.338	1.222	1.28	1.43	1.426	1.428	1.439	1.6	1.5195	0.764831	0.0764537	1.303	1.265	1.284	1.461	1.325	1.393	1.686	1.377	1.5315	0.690113	0.129166
P62270	IPI00317590	Rps18	RS18	40S ribosomal protein S18	0.676	0.722	0.699	0.641	0.656	0.6485	0.705	0.833	0.769	0.64294	0.168477	0.825	0.811	0.818	1.015	1.02	1.0175	0.988	1.105	1.0465	0.689224	0.129865	GO:0097159 organic cyclic compound binding; GO:1901363 heterocyclic compound binding; GO:0003723 RNA binding; GO:0005488 binding; GO:0003676 nucleic acid binding; GO:0005198 structural molecule activity; GO:0003735 structural constituent of ribosome;
Q7TMK9	IPI00406117	Syncrip	HNRPQ	Isoform 1 of Heterogeneous nuclear ribonucleoprotein Q	0.71	0.906	0.808	0.612	0.879	0.7455	0.465	0.644	0.5545	-0.702809	0.119359	1.008	0.968	0.988	0.867	0.84	0.8535	0.595	0.894	0.7445	-0.689031	0.130017	GO:0097159 organic cyclic compound binding; GO:1901363 heterocyclic compound binding; GO:1901265 nucleoside phosphate binding; GO:0005488 binding; GO:0003676 nucleic acid binding; GO:0000166 nucleotide binding; GO:0036094 small molecule binding;
O35901	IPI00136054	Lsm2	LSM2	U6 snRNA-associated Sm-like protein LSm2 isoform 1	1.285	1.997	1.641	1.094	1.753	1.4235	1.018	1.33	1.174	-0.518094	0.292393	1.112	1.322	1.217	0.961	1.59	1.2755	1.481	1.958	1.7195	0.687777	0.131007
Q8BWQ1	IPI00471231	Ugt2a3	UD2A3	UDP-glucuronosyltransferase 2A3	0.583	0.767	0.675	0.564	0.653	0.6085	0.367	0.556	0.4615	-0.736114	0.0952659	0.92	1.676	1.298	0.654	0.677	0.6655	0.318	0.572	0.445	-0.685353	0.132929	GO:0016757 transferase activity, transferring glycosyl groups; GO:0016758 transferase activity, transferring hexosyl groups; GO:0003824 catalytic activity; GO:0016740 transferase activity;
Q8VCW8	IPI00122633	Acsf2	ACSF2	Acyl-CoA synthetase family member 2	0.568	0.714	0.641	0.774	0.867	0.8205	1.012	1.142	1.077	0.915048	0.0105187	0.939	0.953	0.946	1.18	1.276	1.228	0.682	0.811	0.7465	-0.681167	0.136277	GO:0003824 catalytic activity;
Q9CZ44	IPI00387232	Nsfl1c	NSF1C	Isoform 3 of NSFL1 cofactor p47	1.314	1.273	1.2935	1.251	1.257	1.254	1.666	1.762	1.714	0.958654	0.00252889	1.23	1.24	1.235	1.369	1.346	1.3575	1.073	1.194	1.1335	-0.681117	0.136317	GO:0005515 protein binding; GO:0005488 binding;
Q9JHU2	IPI00314152	Palmd	PALMD	Palmdelphin	1.525	1.405	1.465	1.85	1.957	1.9035	1.817	2.051	1.934	0.640155	0.170935	1.275	1.214	1.2445	1.097	1.072	1.0845	1.31	1.417	1.3635	0.676509	0.140043
P16381	IPI00133708	D1Pas1	DDX3L	Putative ATP-dependent RNA helicase Pl10	0.774	0.766	0.77	0.688	0.644	0.666	0.597	0.695	0.646	-0.650832	0.161592	1.048	0.873	0.9605	0.933	0.847	0.89	0.694	0.871	0.7825	-0.675179	0.141127	GO:0005524 ATP binding; GO:1901265 nucleoside phosphate binding; GO:0001882 nucleoside binding; GO:0043167 ion binding; GO:0000166 nucleotide binding; GO:0097159 organic cyclic compound binding; GO:1901363 heterocyclic compound binding; GO:0032549 ribonucleoside binding; GO:0097367 carbohydrate derivative binding; GO:0032553 ribonucleotide binding; GO:0005488 binding; GO:0003676 nucleic acid bind…
Q9WU19	IPI00123750	Hao1	HAOX1	Hydroxyacid oxidase 1	0.516	0.373	0.4445	0.393	0.456	0.4245	0.379	0.226	0.3025	-0.704361	0.118184	0.828	0.951	0.8895	0.765	0.77	0.7675	0.926	1.395	1.1605	0.674558	0.141635	GO:0097159 organic cyclic compound binding; GO:1901363 heterocyclic compound binding; GO:0097367 carbohydrate derivative binding; GO:1901265 nucleoside phosphate binding; GO:0003824 catalytic activity; GO:0032553 ribonucleotide binding; GO:0005488 binding; GO:0043167 ion binding; GO:0043168 anion binding; GO:0000166 nucleotide binding; GO:0010181 FMN binding; GO:0048037 cofactor binding; GO:00164…
Q8C2Q3	IPI00404707	Rbm14	RBM14	Isoform 1 of RNA-binding protein 14	1.984	2.198	2.091	1.929	2.281	2.105	1.586	1.87	1.728	-0.754049	0.0832986	1.149	1.097	1.123	1.201	1.173	1.187	1.17	1.297	1.2335	0.67455	0.141641	GO:0097159 organic cyclic compound binding; GO:1901363 heterocyclic compound binding; GO:1901265 nucleoside phosphate binding; GO:0005488 binding; GO:0003676 nucleic acid binding; GO:0000166 nucleotide binding; GO:0036094 small molecule binding;
O08638	IPI00114894	Myh11	MYH11	Isoform 1 of Myosin-11	1.175	1.395	1.285	1.263	1.784	1.5235	0.832	0.913	0.8725	-0.729448	0.0998958	0.874	0.854	0.864	1.265	1.285	1.275	0.563	0.661	0.612	-0.667627	0.147349	GO:0005524 ATP binding; GO:0003774 motor activity; GO:1901265 nucleoside phosphate binding; GO:0001882 nucleoside binding; GO:0043167 ion binding; GO:0016817 hydrolase activity, acting on acid anhydrides; GO:0016787 hydrolase activity; GO:0005515 protein binding; GO:0000166 nucleotide binding; GO:0017111 nucleoside-triphosphatase activity; GO:0097159 organic cyclic compound binding; GO:1901363 he…
Q9DB77	IPI00119138	Uqcrc2	QCR2	Cytochrome b-c1 complex subunit 2	0.728	0.687	0.7075	0.767	0.739	0.753	0.638	0.638	0.638	-0.802031	0.0549079	0.93	0.874	0.902	1.025	1.019	1.022	0.874	0.694	0.784	-0.666194	0.148542	GO:0004175 endopeptidase activity; GO:0004222 metalloendopeptidase activity; GO:0008233 peptidase activity; GO:0003824 catalytic activity; GO:0005488 binding; GO:0043167 ion binding; GO:0070011 peptidase activity, acting on L-amino acid peptides; GO:0043169 cation binding; GO:0046872 metal ion binding; GO:0008237 metallopeptidase activity; GO:0016787 hydrolase activity;
O88746	IPI00380814	Tom1	TOM1	Isoform 1 of Target of Myb protein 1	1.239	1.191	1.215	1.09	1.047	1.0685	0.971	1.048	1.0095	-0.78712	0.0631531	1.82	1.306	1.563	1.19	1.2	1.195	0.985	1.129	1.057	-0.666116	0.148608
P54869	IPI00420718	Hmgcs2	HMCS2	Hydroxymethylglutaryl-CoA synthase	0.625	0.614	0.6195	0.785	0.814	0.7995	1.018	1.159	1.0885	0.954624	0.00304172	1.095	1.058	1.0765	1.394	1.461	1.4275	1.412	1.48	1.446	0.665366	0.149234	GO:0004421 hydroxymethylglutaryl-CoA synthase activity; GO:0016746 transferase activity, transferring acyl groups; GO:0003824 catalytic activity; GO:0016740 transferase activity; GO:0046912 transferase activity, transferring acyl groups, acyl groups converted into alkyl on transfer;
Q923D2	IPI00113996	Blvrb	FR	Flavin reductase	1.099	1.101	1.1	1.314	1.374	1.344	1.39	1.555	1.4725	0.821083	0.0451532	1.275	1.378	1.3265	0.949	1.077	1.013	1.498	1.558	1.528	0.66229	0.151814
Q9DB15	IPI00118963	Mrpl12	RM12	39S ribosomal protein L12	1.554	1.422	1.488	1.467	1.336	1.4015	0.952	1.036	0.994	-0.964543	0.00186352	1.457	1.388	1.4225	1.554	1.697	1.6255	0.987	1.38	1.1835	-0.659116	0.154497	GO:0003735 structural constituent of ribosome; GO:0005198 structural molecule activity;
P26150	IPI00111855	Hsd3b3	3BHS3	3 beta-hydroxysteroid dehydrogenase	0.868	0.876	0.872	0.608	0.567	0.5875	0.452	0.442	0.447	-0.853865	0.0304728	0.497	0.486	0.4915	0.871	0.884	0.8775	0.272	0.279	0.2755	-0.653343	0.159428	GO:0016229 steroid dehydrogenase activity; GO:0016614 oxidoreductase activity, acting on CH-OH group of donors; GO:0016616 oxidoreductase activity, acting on the CH-OH group of donors, NAD or NADP as acceptor; GO:0033764 steroid dehydrogenase activity, acting on the CH-OH group of donors, NAD or NADP as acceptor; GO:0003824 catalytic activity; GO:0003854 3-beta-hydroxy-delta5-steroid dehydrogenas…
Q8C1W9	IPI00133977	Nap1l4	NP1L4	Putative uncharacterized protein	1.417	1.078	1.2475	1.324	1.193	1.2585	1.271	1.137	1.204	-0.192337	0.715052	2.655	1.946	2.3005	1.257	1.075	1.166	0.934	1.212	1.073	-0.641933	0.169363
Q9DBP5	IPI00331146	Cmpk1	KCY	UMP-CMP kinase	1.731	1.634	1.6825	1.638	1.781	1.7095	1.27	1.415	1.3425	-0.905102	0.0130811	1.22	1.176	1.198	1.179	1.19	1.1845	1.202	1.632	1.417	0.63291	0.177399	GO:0005524 ATP binding; GO:1901265 nucleoside phosphate binding; GO:0001882 nucleoside binding; GO:0043167 ion binding; GO:0019205 nucleobase-containing compound kinase activity; GO:0009041 uridylate kinase activity; GO:0000166 nucleotide binding; GO:0019201 nucleotide kinase activity; GO:0016776 phosphotransferase activity, phosphate group as acceptor; GO:0004127 cytidylate kinase activity; GO:0…
Q8VIJ6	IPI00129430	Sfpq	SFPQ	Splicing factor, proline- and glutamine-rich	1.777	1.43	1.6035	1.356	1.236	1.296	0.971	1.088	1.0295	-0.835183	0.0385085	1.171	1.113	1.142	1.197	1.011	1.104	1.504	1.166	1.335	0.632654	0.177629	GO:0097159 organic cyclic compound binding; GO:1901363 heterocyclic compound binding; GO:1901265 nucleoside phosphate binding; GO:0005488 binding; GO:0003676 nucleic acid binding; GO:0000166 nucleotide binding; GO:0036094 small molecule binding;
Q78PY7	IPI00123129	Snd1	SND1	Staphylococcal nuclease domain-containing protein 1	0.775	0.918	0.8465	0.652	0.814	0.733	0.489	0.591	0.54	-0.86022	0.027942	0.849	0.869	0.859	0.763	0.821	0.792	0.615	0.826	0.7205	-0.629243	0.180708	GO:0097159 organic cyclic compound binding; GO:1901363 heterocyclic compound binding; GO:0003824 catalytic activity; GO:0005488 binding; GO:0003676 nucleic acid binding; GO:0004518 nuclease activity; GO:0016788 hydrolase activity, acting on ester bonds; GO:0016787 hydrolase activity;
Q3THK3	IPI00153986	Gtf2f1	T2FA	General transcription factor IIF subunit 1	1.805	1.561	1.683		1.49	1.49	1.735	1.632	1.6835	0.186532	0.763884	1.474	1.173	1.3235	1.888	1.136	1.512	0.908	0.962	0.935	-0.628368	0.181503	GO:0097159 organic cyclic compound binding; GO:1901363 heterocyclic compound binding; GO:0003677 DNA binding; GO:0003824 catalytic activity; GO:0005488 binding; GO:0003676 nucleic acid binding;
Q9WVA2	IPI00125776	Timm8a1	TIM8A	Mitochondrial import inner membrane translocase subunit Tim8 A	1.595	1.51	1.5525	1.787	1.739	1.763	1.88	2.118	1.999	0.879954	0.0207516	1.178	1.147	1.1625	1.395	1.368	1.3815	1.331	1.444	1.3875	0.626153	0.183518
Q9D6J6	IPI00169925	Ndufv2	NDUV2-A	Isoform 1 of NADH dehydrogenase [ubiquinone] flavoprotein 2	1.842	1.836	1.839	1.799	1.874	1.8365	0.951	1.095	1.023	-0.978194	0.000708084	1.072	1.086	1.079	1.197	1.23	1.2135	0.99	1.035	1.0125	-0.617437	0.191536	GO:0003824 catalytic activity; GO:0016491 oxidoreductase activity;
Q64458	IPI00134503	Cyp2c29	CYPIIC29	Cytochrome P450 2C29	0.644	0.477	0.5605	0.838	0.571	0.7045	1.368	1.239	1.3035	0.956353	0.00281601	1.004	0.982	0.993	1.012	1.063	1.0375	1.004	0.611	0.8075	-0.614755	0.194032	GO:0097159 organic cyclic compound binding; GO:1901363 heterocyclic compound binding; GO:0020037 heme binding; GO:0005506 iron ion binding; GO:0046914 transition metal ion binding; GO:0003824 catalytic activity; GO:0005488 binding; GO:0043167 ion binding; GO:0043169 cation binding; GO:0046872 metal ion binding; GO:0016705 oxidoreductase activity, acting on paired donors, with incorporation or red…
Q9DCT8	IPI00121319	Crip2	CRIP2	Cysteine-rich protein 2	1.559	1.699	1.629	1.36	1.4	1.38	1.005	1.173	1.089	-0.915806	0.0103346	1.505	1.452	1.4785	1.149	1.192	1.1705	1.113		1.113	-0.692264	0.195191	GO:0043169 cation binding; GO:0046872 metal ion binding; GO:0008270 zinc ion binding; GO:0046914 transition metal ion binding; GO:0005488 binding; GO:0043167 ion binding;
Q3UW66	IPI00604945	Mpst	THTM	3-mercaptopyruvate sulfurtransferase	0.782	0.697	0.7395	0.796	0.767	0.7815	0.53	0.752	0.641	-0.578457	0.229094	0.934	0.978	0.956	1.103	1.319	1.211	0.635	0.913	0.774	-0.609169	0.199274	GO:0004792 thiosulfate sulfurtransferase activity; GO:0016782 transferase activity, transferring sulfur-containing groups; GO:0016783 sulfurtransferase activity; GO:0003824 catalytic activity; GO:0016740 transferase activity;
Q925I1	IPI00126913	Atad3a	ATAD3	Isoform 1 of ATPase family AAA domain-containing protein 3	1.152	1.146	1.149	1.66	1.74	1.7	1.018	1.08	1.049	-0.471095	0.345633	1.101	1.091	1.096	1.282	1.367	1.3245	0.935	1.035	0.985	-0.604664	0.203542	GO:0005524 ATP binding; GO:1901265 nucleoside phosphate binding; GO:0001882 nucleoside binding; GO:0043167 ion binding; GO:0000166 nucleotide binding; GO:0097159 organic cyclic compound binding; GO:1901363 heterocyclic compound binding; GO:0032549 ribonucleoside binding; GO:0097367 carbohydrate derivative binding; GO:0032553 ribonucleotide binding; GO:0005488 binding; GO:0032550 purine ribonucleo…
Q9CQX2	IPI00315794	Cyb5b	CYB5B	Cytochrome b5 type B	1.213	1.149	1.181	1.276	1.273	1.2745	1.486	1.58	1.533	0.972923	0.00108979	1.025	1.003	1.014	1.309	1.267	1.288	0.927	0.861	0.894	-0.600617	0.207408	GO:0097159 organic cyclic compound binding; GO:1901363 heterocyclic compound binding; GO:0020037 heme binding; GO:0046906 tetrapyrrole binding; GO:0005488 binding;
Q9CY10	IPI00110658	Hba-a1	HBA	Putative uncharacterized protein	1.186	1.273	1.2295	1.046	1.139	1.0925	1.529	1.828	1.6785	0.86291	0.0269023	0.847	0.859	0.853	1.044	1.109	1.0765	0.62	0.839	0.7295	-0.591486	0.216238	GO:0097159 organic cyclic compound binding; GO:1901363 heterocyclic compound binding; GO:0020037 heme binding; GO:0005506 iron ion binding; GO:0046914 transition metal ion binding; GO:0019825 oxygen binding; GO:0005488 binding; GO:0043167 ion binding; GO:0046872 metal ion binding; GO:0043169 cation binding; GO:0046906 tetrapyrrole binding;
P12787	IPI00120719	Cox5a	COX5A—A	Cytochrome c oxidase subunit 5A	1.839	2.21	2.0245	1.934	2.21	2.072	1.352	1.505	1.4285	-0.875684	0.0222209	1.219	1.205	1.212	1.271	1.328	1.2995	1.208	1.955	1.5815	0.588124	0.219527	GO:0015075 ion transmembrane transporter activity; GO:0022892 substrate-specific transporter activity; GO:0015077 monovalent inorganic cation transmembrane transporter activity; GO:0016676 oxidoreductase activity, acting on a heme group of donors, oxygen as acceptor; GO:0016675 oxidoreductase activity, acting on a heme group of donors; GO:0015078 hydrogen ion transmembrane transporter activity; G…
Q8BP54	IPI00114710	Pcx	PCB	pyruvate carboxylase	0.898	0.836	0.867	0.839	0.813	0.826	0.55	0.617	0.5835	-0.976095	0.000850311	0.985	0.981	0.983	1.042	1.095	1.0685	0.865	0.984	0.9245	-0.584884	0.222715	GO:0004736 pyruvate carboxylase activity; GO:1901265 nucleoside phosphate binding; GO:0016885 ligase activity, forming carbon-carbon bonds; GO:0016874 ligase activity; GO:1901363 heterocyclic compound binding; GO:0097159 organic cyclic compound binding; GO:0031406 carboxylic acid binding; GO:0032553 ribonucleotide binding; GO:0003824 catalytic activity; GO:0005488 binding; GO:0032550 purine ribon…
Q9JLQ0	IPI00268688	Cd2ap	CD2AP	CD2-associated protein	1.778	1.834	1.806	1.199	1.308	1.2535	1.306	1.524	1.415	-0.379523	0.458048	1.146	1.255	1.2005	1.163	1.297	1.23	1.195	1.682	1.4385	0.577972	0.229578	GO:0005515 protein binding; GO:0005488 binding;
Q4VWZ5	IPI00222430	Dbi	ACBP	acyl-CoA-binding protein isoform 1	1.508	1.477	1.4925	2.35	2.176	2.263	2.282	2.275	2.2785	0.64879	0.163362	1.018	0.98	0.999	2.039	1.914	1.9765	1.908	1.866	1.887	0.573901	0.233659	GO:0000062 fatty-acyl-CoA binding; GO:0005488 binding; GO:0043167 ion binding; GO:0043168 anion binding; GO:0048037 cofactor binding; GO:1901681 sulfur compound binding; GO:0050662 coenzyme binding;
Q8VCF0	IPI00122075	Mavs	MAVS	Mitochondrial antiviral-signaling protein	1.646	1.627	1.6365	1.794	1.746	1.77	1.591	1.683	1.637	-0.305975	0.555361	1.143	1.117	1.13	1.403	1.588	1.4955	1.008	0.962	0.985	-0.569927	0.23767
P48024	IPI00137930	Eif1	EIF1	Eukaryotic translation initiation factor 1	1.491	1.169	1.33	1.407	1.69	1.5485	1.949	2.25	2.0995	0.901001	0.0142162	1.583	0.777	1.18	1.602	1.608	1.605	0.802	0.904	0.853	-0.569921	0.237677	GO:0097159 organic cyclic compound binding; GO:1901363 heterocyclic compound binding; GO:0003723 RNA binding; GO:0008135 translation factor activity, RNA binding; GO:0005488 binding; GO:0003676 nucleic acid binding; GO:0003743 translation initiation factor activity;
P12246	IPI00309214	Apcs	SAP	Serum amyloid P-component	0.128		0.128	0.108	0.095	0.1015	0.107		0.107	-0.29643	0.70357	0.805	0.915	0.86	0.944		0.944	0.826	0.708	0.767	-0.64556	0.239381
Q8BGD9	IPI00221581	Eif4b	IF4B	Eukaryotic translation initiation factor 4B	1.748	1.732	1.74	1.624	1.693	1.6585	1.27	1.56	1.415	-0.846237	0.0336468	1.134	1.159	1.1465	1.232	1.518	1.375	1.351	1.45	1.4005	0.562514	0.245225	GO:0097159 organic cyclic compound binding; GO:1901363 heterocyclic compound binding; GO:1901265 nucleoside phosphate binding; GO:0005488 binding; GO:0003676 nucleic acid binding; GO:0000166 nucleotide binding; GO:0036094 small molecule binding;
P97352	IPI00124115	S100a13	S10AD	Protein S100-A13	1.905	1.84	1.8725	1.759	1.826	1.7925	1.175	1.444	1.3095	-0.94866	0.00388596	1.023	1.062	1.0425	1.284	1.367	1.3255	1.265	1.337	1.301	0.560983	0.246797
Q9D1L0	IPI00284925	Chchd2	CHCH2	Coiled-coil-helix-coiled-coil-helix domain-containing protein 2	1.387	1.405	1.396	2.602	2.833	2.7175	2.266	2.643	2.4545	0.4746	0.34155	0.829	0.827	0.828	1.911	1.85	1.8805	1.767	1.756	1.7615	0.558926	0.248915
P16045	IPI00229517	Lgals1	LEG1	Galectin-1	2.185	1.907	2.046	1.349	1.329	1.339	1.738	1.745	1.7415	-0.0899859	0.865385	1.416	1.735	1.5755	1.819	2.244	2.0315	1.849	2.401	2.125	0.555731	0.252218	GO:0030246 carbohydrate binding; GO:0005488 binding;
P20152	IPI00227299	Vim	VIME	Vimentin	1.236	1.171	1.2035	0.647	0.689	0.668	0.717	0.764	0.7405	-0.537963	0.2709	1.333	1.344	1.3385	1.043	0.956	0.9995	0.923	1.121	1.022	-0.551956	0.256145	GO:0005198 structural molecule activity;
Q8VCN5	IPI00122344	Cth	CGL	Cystathionine gamma-lyase	0.793	0.773	0.783	0.696	0.75	0.723	0.365	0.34	0.3525	-0.99452	4.49606e-05	0.787	0.788	0.7875	0.829	0.824	0.8265	0.6	0.817	0.7085	-0.540093	0.268633	GO:0097159 organic cyclic compound binding; GO:1901363 heterocyclic compound binding; GO:0003824 catalytic activity; GO:0005488 binding; GO:0043167 ion binding; GO:0043168 anion binding; GO:0048037 cofactor binding; GO:0030170 pyridoxal phosphate binding;
Q61425	IPI00121105	Hadh	HCDH	Hydroxyacyl-coenzyme A dehydrogenase	0.464	0.54	0.502	0.498	0.522	0.51	0.402	0.5	0.451	-0.556713	0.251201	0.78	0.831	0.8055	0.944	1.005	0.9745	0.738	0.764	0.751	-0.536221	0.27276	GO:1901265 nucleoside phosphate binding; GO:0043167 ion binding; GO:0070403 NAD+ binding; GO:0000166 nucleotide binding; GO:0048037 cofactor binding; GO:0016491 oxidoreductase activity; GO:1901363 heterocyclic compound binding; GO:0097159 organic cyclic compound binding; GO:0016614 oxidoreductase activity, acting on CH-OH group of donors; GO:0016616 oxidoreductase activity, acting on the CH-OH gr…
P51855	IPI00127691	Gss	GSHB	Glutathione synthetase	0.969	0.532	0.7505	0.846	0.487	0.6665	0.537	0.523	0.53	-0.475153	0.340908	0.891	0.779	0.835	0.827	0.704	0.7655	1.588	0.731	1.1595	0.530962	0.278402	GO:0005524 ATP binding; GO:1901265 nucleoside phosphate binding; GO:0004363 glutathione synthase activity; GO:0016874 ligase activity; GO:0001882 nucleoside binding; GO:0043167 ion binding; GO:0000166 nucleotide binding; GO:0016881 acid-amino acid ligase activity; GO:0016879 ligase activity, forming carbon-nitrogen bonds; GO:0097159 organic cyclic compound binding; GO:1901363 heterocyclic compoun…
Q4LDG0	IPI00313236	Slc27a5	S27A5	Bile acyl-CoA synthetase	0.698	0.732	0.715	0.623	0.582	0.6025	0.519	0.5	0.5095	-0.902255	0.0138643	0.844	0.894	0.869	0.88	1.151	1.0155	0.59	0.879	0.7345	-0.529632	0.279835	GO:0003824 catalytic activity;
P58871	IPI00459443	Tnks1bp1	TB182	182 kDa tankyrase-1-binding protein	1.524	1.542	1.533	1.446	1.548	1.497	1.042	1.214	1.128	-0.949219	0.00380258	1.322	1.301	1.3115	1.289	1.287	1.288	1.293	1.422	1.3575	0.529601	0.279869
Q91W19	IPI00856880	Sult1a1	ST1A1	Uncharacterized protein	0.523	0.476	0.4995	0.477	0.349	0.413	0.196	0.143	0.1695	-0.953997	0.00312569		0.888	0.888		1.129	1.129		0.258	0.258	-0.902767	0.283064	GO:0008146 sulfotransferase activity; GO:0016782 transferase activity, transferring sulfur-containing groups; GO:0003824 catalytic activity; GO:0016740 transferase activity;
Q61990	IPI00127707	Pcbp2	PCBP2	Isoform 1 of Poly(rC)-binding protein 2	1.271	1.285	1.278	1.139	1.182	1.1605	1.227	1.404	1.3155	0.430945	0.393599	1.372	1.265	1.3185	1.203	1.278	1.2405	1.241	1.783	1.512	0.519317	0.291052	GO:0097159 organic cyclic compound binding; GO:1901363 heterocyclic compound binding; GO:0003723 RNA binding; GO:0005488 binding; GO:0003676 nucleic acid binding;
Q04447	IPI00136703	Ckb	KCRB	Creatine kinase B-type	1.223	1.172	1.1975	0.834	0.824	0.829	0.616	0.711	0.6635	-0.835756	0.0382488	1.186	1.08	1.133	0.836	0.865	0.8505	0.909	0.873	0.891	-0.516425	0.294226	GO:0016301 kinase activity; GO:0003824 catalytic activity; GO:0016740 transferase activity; GO:0016772 transferase activity, transferring phosphorus-containing groups;
P19639	IPI00338855	Gstm4	GSTM4	Glutathione S-transferase Mu 4	0.114	0.104	0.109	0.541	0.581	0.561	1.063	1.231	1.147	0.955629	0.00290954	9.81	10.054	9.932	1.714	1.754	1.734	11.142	12.982	12.062	0.516209	0.294464	GO:0004364 glutathione transferase activity; GO:0016765 transferase activity, transferring alkyl or aryl (other than methyl) groups; GO:0005515 protein binding; GO:0003824 catalytic activity; GO:0016740 transferase activity; GO:0005488 binding;
Q8R0F9	IPI00153190	Sec14l4	S14L4	SEC14-like protein 4	0.673	0.788	0.7305	0.701	0.796	0.7485	0.478	0.609	0.5435	-0.823525	0.0439673	0.946	1.142	1.044	0.857	0.994	0.9255	0.837	0.947	0.892	-0.513473	0.297481	GO:0005215 transporter activity;
P15626	IPI00228820	Gstm2	GSTM2	Glutathione S-transferase Mu 2	1.35	1.22	1.285	0.61	0.607	0.6085	0.329	0.408	0.3685	-0.809552	0.0509519	0.726	0.733	0.7295	1.394	1.434	1.414	0.521	0.604	0.5625	-0.509661	0.301702	GO:0004364 glutathione transferase activity; GO:0016765 transferase activity, transferring alkyl or aryl (other than methyl) groups; GO:0005515 protein binding; GO:0003824 catalytic activity; GO:0016740 transferase activity; GO:0005488 binding;
Q8BK48	IPI00222489	Ces5	EST2E	carboxylesterase 5	0.731	0.717	0.724	0.725	0.717	0.721	0.477	0.525	0.501	-0.977431	0.000758289	0.778	0.786	0.782	1.093	1.111	1.102	0.683	0.725	0.704	-0.509329	0.30207
Q71RI9	IPI00454201	Ccbl2	KAT3	Isoform 2 of Kynurenine--oxoglutarate transaminase 3	0.691	0.667	0.679	0.679	0.679	0.679	0.432	0.523	0.4775	-0.947032	0.00413417	0.924	0.972	0.948	0.629	0.641	0.635	0.663	0.719	0.691	-0.497986	0.314768	GO:0097159 organic cyclic compound binding; GO:1901363 heterocyclic compound binding; GO:0003824 catalytic activity; GO:0005488 binding; GO:0043167 ion binding; GO:0043168 anion binding; GO:0048037 cofactor binding; GO:0030170 pyridoxal phosphate binding;
P11679	IPI00322209	Krt8	K2C8	Keratin, type II cytoskeletal 8	1.118	1.175	1.1465	0.986	1.069	1.0275	1.066	1.196	1.131	0.169665	0.747945	1.412	1.44	1.426	0.893	0.846	0.8695	1.474	1.627	1.5505	0.493097	0.320302	GO:0005198 structural molecule activity;
Q52PE3	IPI00110852	Ssr1	SSRA	Translocon-associated protein alpha, muscle specific isoform	1.047	1.244	1.1455	0.917	1.051	0.984	0.592	0.694	0.643	-0.931599	0.00685809	1.017	0.997	1.007	0.849	0.873	0.861	0.907	0.868	0.8875	-0.489442	0.324461
P31725	IPI00222556	S100a9	S10A9	Protein S100-A9	1.713	1.599	1.656	0.969	0.903	0.936	2.281	2.356	2.3185	0.7489	0.0866605	1.684	1.536	1.61	1.125	1.268	1.1965	1.727	1.681	1.704	0.483279	0.331519	GO:0043169 cation binding; GO:0046872 metal ion binding; GO:0005509 calcium ion binding; GO:0005488 binding; GO:0043167 ion binding;
Q8BVI4	IPI00459279	Qdpr	DHPR	Dihydropteridine reductase	0.804	0.707	0.7555	0.783	0.728	0.7555	0.589	0.63	0.6095	-0.881609	0.0201949	0.783	0.83	0.8065	0.909	0.885	0.897	0.868	0.596	0.732	-0.470479	0.346352	GO:0003824 catalytic activity; GO:0016491 oxidoreductase activity;
P09813	IPI00111315	Apoa2	ApoA-II	Apolipoprotein A-II	1.797	1.604	1.7005	1.74	1.744	1.742	1.641	1.813	1.727	0.0730294	0.890651	1.16	1.092	1.126	1.213	1.278	1.2455	1.152	1.362	1.257	0.466312	0.351231	GO:0008289 lipid binding; GO:0005488 binding;
Q9D7N9	IPI00221998	2310001A20Rik	APMAP	Adipocyte plasma membrane-associated protein	0.638	0.676	0.657	0.736	0.725	0.7305	1.082	1.243	1.1625	0.977014	0.000786431	0.928	0.876	0.902	1.024	1.151	1.0875	0.876	0.845	0.8605	-0.461682	0.356681	GO:0016844 strictosidine synthase activity; GO:0016829 lyase activity; GO:0016840 carbon-nitrogen lyase activity; GO:0016843 amine-lyase activity; GO:0003824 catalytic activity;
Q05793	IPI00113824	Hspg2	PGBM	Basement membrane-specific heparan sulfate proteoglycan core protein	1.059	1.096	1.0775	0.983	0.949	0.966	0.863		0.863	-0.886333	0.0452103	1.846	2.052	1.949	0.943	0.983	0.963	1.304	1.051	1.1775	-0.458084	0.360936	GO:0043169 cation binding; GO:0046872 metal ion binding; GO:0005515 protein binding; GO:0005509 calcium ion binding; GO:0005488 binding; GO:0043167 ion binding;
Q3U0V1	IPI00462934	Khsrp	FUBP2	Far upstream element-binding protein 2	1.473	1.536	1.5045	1.241	1.275	1.258	0.943	0.993	0.968	-0.948073	0.00397459	1.179	1.133	1.156	1.145	1.115	1.13	1.105	1.35	1.2275	0.448592	0.372249	GO:0097159 organic cyclic compound binding; GO:1901363 heterocyclic compound binding; GO:0003723 RNA binding; GO:0005488 binding; GO:0003676 nucleic acid binding;
P00920	IPI00121534	Car2	CAH2	Carbonic anhydrase 2	0.881	0.874	0.8775	0.738	0.78	0.759	0.792	0.864	0.828	-0.0703787	0.894606	0.676	0.684	0.68	0.755	0.734	0.7445	0.596	0.711	0.6535	-0.445515	0.375941	GO:0046914 transition metal ion binding; GO:0003824 catalytic activity; GO:0005488 binding; GO:0043167 ion binding; GO:0046872 metal ion binding; GO:0043169 cation binding; GO:0016829 lyase activity; GO:0016836 hydro-lyase activity; GO:0004089 carbonate dehydratase activity; GO:0008270 zinc ion binding; GO:0016835 carbon-oxygen lyase activity;
P50431	IPI00118059	Shmt1	GLYC	Serine hydroxymethyltransferase	0.665	0.666	0.6655	0.731	0.732	0.7315	0.375	0.42	0.3975	-0.931761	0.00682593	0.885	0.851	0.868	0.875	0.825	0.85	0.864	0.807	0.8355	-0.444106	0.377636	GO:0097159 organic cyclic compound binding; GO:1901363 heterocyclic compound binding; GO:0003824 catalytic activity; GO:0005488 binding; GO:0043167 ion binding; GO:0004372 glycine hydroxymethyltransferase activity; GO:0016741 transferase activity, transferring one-carbon groups; GO:0043168 anion binding; GO:0016742 hydroxymethyl-, formyl- and related transferase activity; GO:0048037 cofactor bind…
Q9D5J8	IPI00315581	Gstm6	GSTM6	Putative uncharacterized protein	1.28	1.179	1.2295	1.177	1.083	1.13	0.721	0.74	0.7305	-0.982931	0.000434531	0.673	0.7	0.6865	1.288	1.268	1.278	0.584	0.636	0.61	-0.438697	0.384169	GO:0004364 glutathione transferase activity; GO:0016765 transferase activity, transferring alkyl or aryl (other than methyl) groups; GO:0005515 protein binding; GO:0003824 catalytic activity; GO:0016740 transferase activity; GO:0005488 binding;
O35459	IPI00130804	Ech1	ECH1	Delta(3,5)-Delta(2,4)-dienoyl-CoA isomerase	0.647	0.619	0.633	0.883	0.864	0.8735	1.208	1.345	1.2765	0.967648	0.00155306	1.048	1.068	1.058	1.629	1.508	1.5685	1.384	1.505	1.4445	0.434496	0.389269	GO:0003824 catalytic activity;
Q9CQ86	IPI00132184	1810046J19Rik	MIEN1	Protein C17orf37 homolog	1.3	1.292	1.296	1.353	1.386	1.3695	1.603	1.784	1.6935	0.955735	0.00289566	1.386	1.277	1.3315	2.265	2.351	2.308	1.173	1.248	1.2105	-0.433928	0.389961
Q922Y1	IPI00123589	Ubxn1	UBXN1	UBX domain-containing protein 1	1.42	1.257	1.3385	1.089	1.081	1.085	1.313	1.409	1.361	0.376745	0.461619	1.099	1.148	1.1235	1.642	1.601	1.6215	1.014	1.107	1.0605	-0.43392	0.38997	GO:0005515 protein binding; GO:0005488 binding;
Q8BI84	IPI00222037	Mia3	MIA3	Isoform 1 of Melanoma inhibitory activity protein 3	1.547	1.589	1.568	1.658	1.818	1.738	1.31	1.611	1.4605	-0.51175	0.299386	1.432	1.485	1.4585	1.348	1.338	1.343	1.282	1.427	1.3545	-0.432226	0.392035	GO:0005515 protein binding; GO:0005488 binding;
P09411	IPI00555069	Pgk1	PGK1	Phosphoglycerate kinase 1	0.706	0.74	0.723	0.7	0.739	0.7195	0.573	0.74	0.6565	-0.513775	0.297146	0.842	0.925	0.8835	0.986	0.997	0.9915	0.72	0.946	0.833	-0.426322	0.399259	GO:0016774 phosphotransferase activity, carboxyl group as acceptor; GO:0016301 kinase activity; GO:0003824 catalytic activity; GO:0016740 transferase activity; GO:0004618 phosphoglycerate kinase activity; GO:0016772 transferase activity, transferring phosphorus-containing groups;
Q8VCH8	IPI00165799	Ubxn4	UBXN4	UBX domain-containing protein 4	0.764	0.688	0.726	0.78	0.67	0.725	1.418	1.482	1.45	0.977159	0.000776626	1.893	1.798	1.8455	2.374	2.429	2.4015	2.157	2.364	2.2605	0.418641	0.408725	GO:0005515 protein binding; GO:0005488 binding;
Q99K28	IPI00109656	Arfgap2	ARF GAP 2	Isoform 2 of ADP-ribosylation factor GTPase-activating protein 2	1.55	1.717	1.6335	1.48	1.852	1.666	1.004	1.366	1.185	-0.790506	0.0612344	1.132	1.184	1.158	1.156	1.286	1.221	1.124	1.431	1.2775	0.415776	0.412274	GO:0098772 molecular function regulator; GO:0030234 enzyme regulator activity; GO:0008047 enzyme activator activity; GO:0060589 nucleoside-triphosphatase regulator activity; GO:0005096 GTPase activator activity; GO:0030695 GTPase regulator activity;
G3X8Q9	IPI00264925	Cyp2b10	CYPIIB10	57 kDa protein	0.696	0.629	0.6625	0.746	0.693	0.7195	1.096	1.429	1.2625	0.935205	0.00616164	0.956	0.995	0.9755	1.162	1.311	1.2365	0.871	1.003	0.937	-0.413389	0.415239	GO:0097159 organic cyclic compound binding; GO:1901363 heterocyclic compound binding; GO:0020037 heme binding; GO:0005506 iron ion binding; GO:0046914 transition metal ion binding; GO:0003824 catalytic activity; GO:0005488 binding; GO:0043167 ion binding; GO:0043169 cation binding; GO:0046872 metal ion binding; GO:0016705 oxidoreductase activity, acting on paired donors, with incorporation or red…
Q8R0W0	IPI00320459	Eppk1	EPIPL	Epiplakin	1.909	1.163	1.536	1.727	1.245	1.486	1.437	0.924	1.1805	-0.468335	0.34886	0.995	0.965	0.98	1.208	0.767	0.9875	1.095	1.115	1.105	0.40601	0.42445
Q9CR51	IPI00133163	Atp6v1g1	VATG1	V-type proton ATPase subunit G 1	1.751	1.718	1.7345	1.328	1.486	1.407	1.437	1.65	1.5435	-0.230605	0.660223	1.246	1.263	1.2545	1.538	1.511	1.5245	1.166	1.29	1.228	-0.402777	0.428505	GO:0022804 active transmembrane transporter activity; GO:0003824 catalytic activity; GO:0016817 hydrolase activity, acting on acid anhydrides; GO:0016820 hydrolase activity, acting on acid anhydrides, catalyzing transmembrane movement of substances; GO:0016787 hydrolase activity; GO:0005215 transporter activity; GO:0022857 transmembrane transporter activity;
P51150	IPI00408892	Rab7	RAB7A	Ras-related protein Rab-7a	0.752	0.722	0.737	0.596	0.556	0.576	0.68	0.62	0.65	-0.206425	0.69476	0.842	0.886	0.864	0.857	0.806	0.8315	0.846	0.923	0.8845	0.40238	0.429004	GO:1901265 nucleoside phosphate binding; GO:0001882 nucleoside binding; GO:0043167 ion binding; GO:0000166 nucleotide binding; GO:0097159 organic cyclic compound binding; GO:1901363 heterocyclic compound binding; GO:0032549 ribonucleoside binding; GO:0097367 carbohydrate derivative binding; GO:0032553 ribonucleotide binding; GO:0005488 binding; GO:0032550 purine ribonucleoside binding; GO:0043168…
Q7TNV0	IPI00227720	Dek	DEK	Protein DEK	1.867	2.017	1.942	1.382	1.444	1.413	0.986	0.999	0.9925	-0.908055	0.0122921	1.243	1.097	1.17	1.609	1.097	1.353	1.063	1.082	1.0725	-0.388334	0.44678	GO:0097159 organic cyclic compound binding; GO:1901363 heterocyclic compound binding; GO:0003677 DNA binding; GO:0005488 binding; GO:0003676 nucleic acid binding;
Q9QXY6	IPI00135677	Ehd3	EHD3	EH domain-containing protein 3	1.607	1.314	1.4605	1.717	1.316	1.5165	1.01	0.884	0.947	-0.836393	0.0379613	1.435	1.181	1.308	1.211	1.15	1.1805	1.615	1.191	1.403	0.380274	0.457085	GO:1901265 nucleoside phosphate binding; GO:0001882 nucleoside binding; GO:0043167 ion binding; GO:0005515 protein binding; GO:0000166 nucleotide binding; GO:0097159 organic cyclic compound binding; GO:1901363 heterocyclic compound binding; GO:0032549 ribonucleoside binding; GO:0097367 carbohydrate derivative binding; GO:0032553 ribonucleotide binding; GO:0005488 binding; GO:0032550 purine ribonu…
P47911	IPI00313222	Rpl6	RL6	60S ribosomal protein L6	0.598	0.616	0.607	0.458	0.478	0.468	0.326	0.428	0.377	-0.84861	0.0326437	0.837	0.787	0.812	0.665	0.725	0.695	0.707	0.745	0.726	-0.378681	0.459129	GO:0003735 structural constituent of ribosome; GO:0005198 structural molecule activity;
P28798	IPI00124640	Grn	GRN	granulins	1.443	1.44	1.4415	1.363	1.32	1.3415	2.925	3.236	3.0805	0.968639	0.00145986	1.423	1.27	1.3465	1.297	1.26	1.2785	1.351	1.394	1.3725	0.37477	0.464163
Q3TMH2	IPI00137758	Scrn3	SCRN3	Secernin-3		0.716	0.716	0.865	0.785	0.825	0.537	0.51	0.5235	-0.882665	0.0473895	0.578	0.88	0.729	0.846	0.937	0.8915	0.901	0.86	0.8805	0.373375	0.465963	GO:0070011 peptidase activity, acting on L-amino acid peptides; GO:0016787 hydrolase activity; GO:0008233 peptidase activity; GO:0008238 exopeptidase activity; GO:0003824 catalytic activity; GO:0016805 dipeptidase activity;
Q9QZW0	IPI00138179	Atp11c	AT11C	Isoform 2 of Probable phospholipid-transporting ATPase 11C	0.781	1.038	0.9095	0.663	0.774	0.7185	0.46		0.46	-0.836751	0.077211	0.835	1.358	1.0965	0.653		0.653	0.821	2.146	1.4835	0.43229	0.46725	GO:1901265 nucleoside phosphate binding; GO:0005319 lipid transporter activity; GO:0016817 hydrolase activity, acting on acid anhydrides; GO:0022892 substrate-specific transporter activity; GO:0016787 hydrolase activity; GO:0016887 ATPase activity; GO:0097159 organic cyclic compound binding; GO:1901363 heterocyclic compound binding; GO:0016462 pyrophosphatase activity; GO:0003824 catalytic activi…
Q9CXS4	IPI00318428	Cenpv	CENP-V	Isoform 1 of Centromere protein V	0.752	0.708	0.73	0.673	0.79	0.7315	0.576	0.676	0.626	-0.717608	0.108358	0.815	0.963	0.889	0.735	0.88	0.8075	0.696	0.88	0.788	-0.369809	0.470574	GO:0016829 lyase activity; GO:0016846 carbon-sulfur lyase activity; GO:0003824 catalytic activity;
Q6ZQI3	IPI00312018	Mlec	MLEC	Uncharacterized protein	0.765	0.908	0.8365	0.612	0.676	0.644	0.581	0.708	0.6445	-0.538621	0.270199	0.869	0.968	0.9185	0.762	0.882	0.822	0.725	0.913	0.819	-0.36314	0.479234
Q99LC5	IPI00116753	Etfa	ETFA	Electron transfer flavoprotein subunit alpha	0.784	0.776	0.78	0.888	0.918	0.903	0.593	0.715	0.654	-0.726214	0.102177	0.83	0.889	0.8595	0.918	0.989	0.9535	0.885	0.989	0.937	0.362285	0.480347	GO:0097159 organic cyclic compound binding; GO:1901363 heterocyclic compound binding; GO:0009055 electron carrier activity; GO:1901265 nucleoside phosphate binding; GO:0050660 flavin adenine dinucleotide binding; GO:0005488 binding; GO:0043167 ion binding; GO:0043168 anion binding; GO:0000166 nucleotide binding; GO:0048037 cofactor binding; GO:0036094 small molecule binding; GO:0050662 coenzyme b…
Q8BGC0	IPI00221566	Htatsf1	HTSF1	Isoform 1 of HIV Tat-specific factor 1 homolog		1.828	1.828	1.169	1.685	1.427		1.046	1.046	-0.755655	0.244345		5.821	5.821	3.959	2.092	3.0255		2.743	2.743	-0.51911	0.48089	GO:0097159 organic cyclic compound binding; GO:1901363 heterocyclic compound binding; GO:1901265 nucleoside phosphate binding; GO:0005488 binding; GO:0003676 nucleic acid binding; GO:0000166 nucleotide binding; GO:0036094 small molecule binding;
B1AWE0	IPI00648658	Clta	CLCA	clathrin light chain A isoform d	1.525	1.889	1.707	1.248	1.401	1.3245	0.954	1.34	1.147	-0.700574	0.121061	1.338	1.394	1.366	1.128	1.292	1.21	1.171	1.782	1.4765	0.358569	0.485198	GO:0005198 structural molecule activity;
P51859	IPI00313817	Hdgf	HDGF	Hepatoma-derived growth factor	1.607	1.498	1.5525	1.578	1.53	1.554	1.244	1.422	1.333	-0.845437	0.0339884	1.18	1.214	1.197	1.227	1.18	1.2035	1.159	1.321	1.24	0.355841	0.488767
Q3TSB7	IPI00652436	Actg1	ACTG	Putative uncharacterized protein	0.62	0.618	0.619	0.44	0.483	0.4615	0.347	0.389	0.368	-0.867219	0.0252758	0.957	0.892	0.9245	0.753	0.751	0.752	0.775	0.844	0.8095	-0.332192	0.520041
P06728	IPI00377351	Apoa4	ApoA-IV	Apolipoprotein A-IV	1.122	1.105	1.1135	0.681	0.616	0.6485	1.519	1.635	1.577	0.762216	0.0780893	1.745	1.792	1.7685	1.07	1.061	1.0655	1.874	1.655	1.7645	0.332138	0.520114	GO:0008289 lipid binding; GO:0005488 binding;
Q00623	IPI00121209	Apoa1	ApoA-I	Apolipoprotein A-I	2.28	2.122	2.201	1.18	1.247	1.2135	1.306	1.427	1.3665	-0.519819	0.290502	1.242	1.253	1.2475	1.054	1.015	1.0345	1.12	1.421	1.2705	0.327617	0.526157	GO:0008289 lipid binding; GO:0005488 binding;
P30999	IPI00403823	Ctnnd1	CTND1	Isoform 1 of Catenin delta-1	1.858	1.617	1.7375	1.752	1.767	1.7595	1.762	1.94	1.851	0.493553	0.319784	1.242	1.102	1.172	1.216	1.207	1.2115	1.184	1.258	1.221	0.324271	0.530642	GO:0005515 protein binding; GO:0005488 binding;
Q5SV64	IPI00338604	Myh10	MYH10	Uncharacterized protein	1.808	1.69	1.749	1.122	1.02	1.071	1.051	1.177	1.114	-0.587307	0.220329	1.494	1.375	1.4345	1.113	1.189	1.151	1.058	1.392	1.225	-0.322849	0.532552	GO:0051015 actin filament binding; GO:0003774 motor activity; GO:1901265 nucleoside phosphate binding; GO:0016817 hydrolase activity, acting on acid anhydrides; GO:0016787 hydrolase activity; GO:0005515 protein binding; GO:0097159 organic cyclic compound binding; GO:1901363 heterocyclic compound binding; GO:0016462 pyrophosphatase activity; GO:0008092 cytoskeletal protein binding; GO:0003824 cata…
P15532	IPI00131459	Nme1	NDKA	Nucleoside diphosphate kinase A	1.504	1.391	1.4475	0.927	0.974	0.9505	1.474	1.625	1.5495	0.477349	0.338362	0.892	0.882	0.887	1.061	1.083	1.072	0.979	1.03	1.0045	0.315245	0.542797	GO:0016301 kinase activity; GO:0003824 catalytic activity; GO:0004550 nucleoside diphosphate kinase activity; GO:0019205 nucleobase-containing compound kinase activity; GO:0016740 transferase activity; GO:0016776 phosphotransferase activity, phosphate group as acceptor; GO:0016772 transferase activity, transferring phosphorus-containing groups;
Q80XK1	IPI00652237	Cyp2a5	CYPIIA5	cytochrome P450 2A5	0.755	0.794	0.7745	0.758	0.785	0.7715	0.782	0.861	0.8215	0.635637	0.174955	0.487	0.548	0.5175	1.582	1.488	1.535	0.484	0.617	0.5505	-0.314373	0.543976	GO:0097159 organic cyclic compound binding; GO:1901363 heterocyclic compound binding; GO:0020037 heme binding; GO:0005506 iron ion binding; GO:0046914 transition metal ion binding; GO:0003824 catalytic activity; GO:0005488 binding; GO:0043167 ion binding; GO:0043169 cation binding; GO:0046872 metal ion binding; GO:0016705 oxidoreductase activity, acting on paired donors, with incorporation or red…
Q9CZS1	IPI00113073	Aldh1b1	AL1B1	Aldehyde dehydrogenase X	0.798	0.792	0.795	0.737	0.614	0.6755	0.475	0.505	0.49	-0.935627	0.00608247	0.845	0.793	0.819	0.862	0.733	0.7975	0.86	0.664	0.762	-0.313847	0.544686	GO:0016620 oxidoreductase activity, acting on the aldehyde or oxo group of donors, NAD or NADP as acceptor; GO:0003824 catalytic activity; GO:0016491 oxidoreductase activity; GO:0016903 oxidoreductase activity, acting on the aldehyde or oxo group of donors;
Q3UYW8	IPI00553798	Ahnak	AHNAK	AHNAK nucleoprotein isoform 1	1.859	1.978	1.9185	1.406	1.559	1.4825	1.424	1.676	1.55	-0.473462	0.342874	1.225	1.238	1.2315	0.956	0.998	0.977	1.008	1.127	1.0675	-0.313756	0.54481	GO:0005515 protein binding; GO:0005488 binding;
Q91WK0	IPI00314075	Lrrfip2	LRRF2	Isoform 1 of Leucine-rich repeat flightless-interacting protein 2	1.745	2.374	2.0595	1.384	1.711	1.5475	1.379	1.579	1.479	-0.557231	0.250666	1.237	1.282	1.2595	1.265	1.227	1.246	1.061	1.715	1.388	0.309147	0.551053
P01887	IPI00109966	B2m	B2MG	Beta-2-microglobulin	2.096	2.159	2.1275	1.422	1.45	1.436	1.024	1.202	1.113	-0.841779	0.0355705	1.513	1.264	1.3885	1.275	1.25	1.2625	1.26	1.309	1.2845	-0.303853	0.558247	GO:0005515 protein binding; GO:0005488 binding;
P37040	IPI00621548	Por	CPR	NADPH--cytochrome P450 reductase	0.655	0.598	0.6265	0.658	0.633	0.6455	1.162	1.181	1.1715	0.987112	0.000248074	1.144	1.191	1.1675	1.165	1.211	1.188	1.21	1.08	1.145	-0.301984	0.560793	GO:0016651 oxidoreductase activity, acting on NAD(P)H; GO:1901265 nucleoside phosphate binding; GO:0016653 oxidoreductase activity, acting on NAD(P)H, heme protein as acceptor; GO:0043167 ion binding; GO:0000166 nucleotide binding; GO:0048037 cofactor binding; GO:0016491 oxidoreductase activity; GO:0003958 NADPH-hemoprotein reductase activity; GO:1901363 heterocyclic compound binding; GO:0097159 …
Q99020	IPI00117288	Hnrnpab	ROAA	Heterogeneous nuclear ribonucleoprotein A/B	1.646	2.042	1.844	1.478	1.872	1.675	1.247	1.432	1.3395	-0.766825	0.075217	1.33	1.215	1.2725	1.17	1.226	1.198	1.094	1.615	1.3545	0.299186	0.564611	GO:0097159 organic cyclic compound binding; GO:1901363 heterocyclic compound binding; GO:1901265 nucleoside phosphate binding; GO:0005488 binding; GO:0003676 nucleic acid binding; GO:0000166 nucleotide binding; GO:0036094 small molecule binding;
Q9DCM2	IPI00121051	Gstk1	GSTK1	Glutathione S-transferase kappa 1	0.957	1.006	0.9815	0.746	1.147	0.9465	1.116	1.291	1.2035	0.63743	0.173354	0.988	1.146	1.067	1.559	1.647	1.603	0.951		0.951	-0.333869	0.58294	GO:0015035 protein disulfide oxidoreductase activity; GO:0016667 oxidoreductase activity, acting on a sulfur group of donors; GO:0015036 disulfide oxidoreductase activity; GO:0003824 catalytic activity; GO:0016491 oxidoreductase activity;
A4QMV1	IPI00756355	Ppp4r2	PP4R2	Uncharacterized protein	1.723	1.877	1.8	1.58	1.797	1.6885	1.291	1.413	1.352	-0.911935	0.0112916	1.121	1.274	1.1975	1.226	1.508	1.367	1.2	1.487	1.3435	0.278218	0.59344	GO:0098772 molecular function regulator; GO:0030234 enzyme regulator activity; GO:0019888 protein phosphatase regulator activity; GO:0019208 phosphatase regulator activity;
Q9D898	IPI00111117	Arpc5l	ARP5L	Actin-related protein 2/3 complex subunit 5-like protein	1.636	1.698	1.667	1.39	1.427	1.4085	1.563	1.91	1.7365	0.424991	0.400894	1.125	1.055	1.09	1.15	1.191	1.1705	1.053	1.125	1.089	-0.273055	0.600597
Q3UKW2	IPI00467841	Calm2	CALM	Uncharacterized protein	1.299	1.213	1.256	1.501	1.409	1.455	0.545	0.621	0.583	-0.917881	0.00983831	1.156	1.1	1.128	0.918	0.916	0.917	1.075	1.149	1.112	0.268065	0.607533	GO:0043169 cation binding; GO:0046872 metal ion binding; GO:0005509 calcium ion binding; GO:0005488 binding; GO:0043167 ion binding;
Q80Y14	IPI00378120	Glrx5	GLRX5	Glutaredoxin-related protein 5	1.346	1.483	1.4145	1.406	1.524	1.465	1.146	1.441	1.2935	-0.522746	0.287305	1.769	1.448	1.6085	1.258	1.269	1.2635	1.343	1.441	1.392	-0.259704	0.619202	GO:0009055 electron carrier activity; GO:0015035 protein disulfide oxidoreductase activity; GO:0016667 oxidoreductase activity, acting on a sulfur group of donors; GO:0015036 disulfide oxidoreductase activity; GO:0003824 catalytic activity; GO:0016491 oxidoreductase activity;
P10605	IPI00113517	Ctsb	CATB	Cathepsin B	1.679	1.652	1.6655	1.498	1.541	1.5195	1.822	2.022	1.922	0.807611	0.05196	1.2	1.284	1.242	1.179	1.212	1.1955	1.176	1.34	1.258	0.248382	0.635089	GO:0004175 endopeptidase activity; GO:0070011 peptidase activity, acting on L-amino acid peptides; GO:0008234 cysteine-type peptidase activity; GO:0016787 hydrolase activity; GO:0008233 peptidase activity; GO:0004197 cysteine-type endopeptidase activity; GO:0003824 catalytic activity;
P23881	IPI00137142	Tcea3	TCEA3	Transcription elongation factor A protein 3	1.471	1.357	1.414	1.09	0.96	1.025	0.53	0.549	0.5395	-0.949904	0.00370162	1.098	1.049	1.0735	1.266	1.217	1.2415	1.07	1.11	1.09	-0.246783	0.63734	GO:0097159 organic cyclic compound binding; GO:1901363 heterocyclic compound binding; GO:0046914 transition metal ion binding; GO:0005488 binding; GO:0003676 nucleic acid binding; GO:0043167 ion binding; GO:0046872 metal ion binding; GO:0043169 cation binding; GO:0008270 zinc ion binding;
Q99K67	IPI00387491	Aass	AASS	Alpha-aminoadipic semialdehyde synthase	0.716	0.814	0.765	0.645	0.97	0.8075	0.444	0.626	0.535	-0.69576	0.124762	0.935	0.94	0.9375	0.816	0.909	0.8625	0.559	1.1	0.8295	-0.23071	0.660075	GO:0003824 catalytic activity; GO:0016491 oxidoreductase activity;
D3Z1P4	IPI00120475	Gm10063	D3Z1P4	40S ribosomal protein S12	1.726	1.64	1.683	1.608	1.488	1.548	1.443	1.498	1.4705	-0.77704	0.0690252	1.136	1.168	1.152	1.339	1.265	1.302	1.226	1.106	1.166	-0.22342	0.670446	GO:0003735 structural constituent of ribosome; GO:0005198 structural molecule activity;
P50285	IPI00116432	Fmo1	FMO1	Dimethylaniline monooxygenase [N-oxide-forming] 1	0.702	0.789	0.7455	0.473	0.656	0.5645	0.347	0.532	0.4395	-0.759655	0.0797067	0.895	1.085	0.99	0.925	1.051	0.988	0.529	1.241	0.885	-0.218835	0.676987	GO:0016709 oxidoreductase activity, acting on paired donors, with incorporation or reduction of molecular oxygen, NAD(P)H as one donor, and incorporation of one atom of oxygen; GO:1901265 nucleoside phosphate binding; GO:0050660 flavin adenine dinucleotide binding; GO:0043167 ion binding; GO:0016705 oxidoreductase activity, acting on paired donors, with incorporation or reduction of molecular oxy…
P70349	IPI00108189	Hint1	HINT1	Histidine triad nucleotide-binding protein 1	1.453	1.431	1.442	1.69	1.628	1.659	1.355	1.514	1.4345	-0.334449	0.517031	1.055	1.092	1.0735	0.947	1.05	0.9985	0.961	1.081	1.021	-0.216994	0.679618	GO:0003824 catalytic activity;
P33622	IPI00114099	Apoc3	ApoC-III	apolipoprotein C-III precursor	1.879	1.931	1.905	1.487	1.539	1.513	1.891	2.283	2.087	0.55659	0.251328	1.223	1.178	1.2005	0.904	1	0.952	1.103	1.237	1.17	0.214842	0.682696	GO:0008289 lipid binding; GO:0005488 binding;
P11031	IPI00225633	Sub1	TCP4	Activated RNA polymerase II transcriptional coactivator p15	2.037	2.038	2.0375	1.83	1.917	1.8735	0.968	1.019	0.9935	-0.997631	8.41429e-06	1.27	1.223	1.2465	0.868	0.932	0.9	0.982	1.138	1.06	-0.203253	0.699319	GO:0000989 transcription factor activity, transcription factor binding; GO:0097159 organic cyclic compound binding; GO:1901363 heterocyclic compound binding; GO:0003677 DNA binding; GO:0003713 transcription coactivator activity; GO:0003712 transcription cofactor activity; GO:0000988 transcription factor activity, protein binding; GO:0005488 binding; GO:0003676 nucleic acid binding;
Q8C7G5	IPI00331221	Apoa5	ApoA-V	Apolipoprotein A-V	1.342	1.798	1.57	1.155	1.262	1.2085	1.23		1.23	-0.42828	0.471859	2.193		2.193	1.393		1.393	2.14	1.088	1.614	-0.270389	0.729611	GO:0008289 lipid binding; GO:0005488 binding;
Q8R409	IPI00153798	Hexim1	HEXI1	Protein HEXIM1	1.612	1.724	1.668	1.306	1.537	1.4215	0.961	1.073	1.017	-0.936255	0.0059657	1.007	1.008	1.0075	1.19	1.132	1.161	0.967	1.094	1.0305	-0.179755	0.733271	GO:0097159 organic cyclic compound binding; GO:1901363 heterocyclic compound binding; GO:0030291 protein serine/threonine kinase inhibitor activity; GO:0003723 RNA binding; GO:0030234 enzyme regulator activity; GO:0016538 cyclin-dependent protein serine/threonine kinase regulator activity; GO:0019210 kinase inhibitor activity; GO:0005488 binding; GO:0003676 nucleic acid binding; GO:0004861 cyclin…
Q8VDD5	IPI00123181	Myh9	MYH9	Myosin-9	1.644	1.724	1.684	1.147	1.284	1.2155	0.912	1.115	1.0135	-0.810819	0.0502987	1.155	1.231	1.193	1.174	1.212	1.193	1.132	1.293	1.2125	0.169719	0.747866	GO:0005524 ATP binding; GO:0003774 motor activity; GO:1901265 nucleoside phosphate binding; GO:0001882 nucleoside binding; GO:0043167 ion binding; GO:0016817 hydrolase activity, acting on acid anhydrides; GO:0016787 hydrolase activity; GO:0005515 protein binding; GO:0000166 nucleotide binding; GO:0017111 nucleoside-triphosphatase activity; GO:0097159 organic cyclic compound binding; GO:1901363 he…
P14733	IPI00230394	Lmnb1	LMNB1	Lamin-B1	1.347	1.282	1.3145	0.955	0.945	0.95	0.469	0.458	0.4635	-0.962935	0.00203528	1.059	1.018	1.0385	0.816	0.839	0.8275	0.893	0.972	0.9325	-0.167453	0.751168	GO:0005198 structural molecule activity;
P80313	IPI00331174	Cct7	TCPH	T-complex protein 1 subunit eta	0.644	0.633	0.6385	0.577	0.581	0.579	0.55	0.594	0.572	-0.651949	0.160628	0.781	0.84	0.8105	0.766	0.833	0.7995	0.715	0.862	0.7885	-0.167209	0.751525	GO:0005524 ATP binding; GO:1901265 nucleoside phosphate binding; GO:0001882 nucleoside binding; GO:0043167 ion binding; GO:0005515 protein binding; GO:0000166 nucleotide binding; GO:0097159 organic cyclic compound binding; GO:1901363 heterocyclic compound binding; GO:0032549 ribonucleoside binding; GO:0097367 carbohydrate derivative binding; GO:0032553 ribonucleotide binding; GO:0005488 binding; …
Q61166	IPI00117896	Mapre1	MARE1	Microtubule-associated protein RP/EB family member 1	1.032	1.14	1.086		1.072	1.072	1.228	1.51	1.369	0.814484	0.0932044		1.317	1.317		2.187	2.187		1.291	1.291	-0.366925	0.760821	GO:0015631 tubulin binding; GO:0005515 protein binding; GO:0008092 cytoskeletal protein binding; GO:0008017 microtubule binding; GO:0005488 binding;
Q91WK5	IPI00556699	Gcsh	GCSH	Uncharacterized protein	1.654	1.69	1.672	1.642	1.708	1.675	1.019	1.191	1.105	-0.964684	0.00184879	1.146	1.172	1.159	1.371	1.395	1.383	1.198	1.346	1.272	0.160088	0.761919
Q9CQM5	IPI00471077	Txndc17	TXD17	Thioredoxin domain-containing protein 17	1.254	1.342	1.298	1.222	1.442	1.332	1.42	1.641	1.5305	0.738254	0.0938002	1.143	1.34	1.2415	1.016	1.179	1.0975	1.05	1.257	1.1535	-0.156967	0.766484
Q9DB20	IPI00118986	Atp5o	ATPO	ATP synthase subunit O	1.313	1.406	1.3595	1.582	1.752	1.667	1.784	2.054	1.919	0.846719	0.0334419	0.984	1.013	0.9985	1.351	1.32	1.3355	0.934	1.189	1.0615	-0.15376	0.771178	GO:0022804 active transmembrane transporter activity; GO:0042625 ATPase coupled ion transmembrane transporter activity; GO:0015075 ion transmembrane transporter activity; GO:0022853 active ion transmembrane transporter activity; GO:0015399 primary active transmembrane transporter activity; GO:0022892 substrate-specific transporter activity; GO:0044769 ATPase activity, coupled to transmembrane mov…
Q3TED3	IPI00126248	Acly	ACLY	ATP-citrate synthase isoform 1	0.866	0.768	0.817	1.079	1.059	1.069	0.42	0.468	0.444	-0.826929	0.0423384	0.717	0.787	0.752	1.143	1.045	1.094	0.685	0.951	0.818	-0.144729	0.784423	GO:0005524 ATP binding; GO:1901265 nucleoside phosphate binding; GO:0046912 transferase activity, transferring acyl groups, acyl groups converted into alkyl on transfer; GO:0001882 nucleoside binding; GO:0043167 ion binding; GO:0000166 nucleotide binding; GO:0048037 cofactor binding; GO:0003878 ATP citrate synthase activity; GO:0097159 organic cyclic compound binding; GO:1901363 heterocyclic comp…
Q5U3K5	IPI00349069	B230208H17Rik	RABL6	Putative GTP-binding protein Parf	1.946	1.398	1.672	1.688	1.691	1.6895	1.13	1.015	1.0725	-0.854106	0.030375	1.16	1.31	1.235	1.112	1.387	1.2495	1.058	1.513	1.2855	0.131184	0.804353	GO:1901265 nucleoside phosphate binding; GO:0001882 nucleoside binding; GO:0043167 ion binding; GO:0000166 nucleotide binding; GO:0097159 organic cyclic compound binding; GO:1901363 heterocyclic compound binding; GO:0032549 ribonucleoside binding; GO:0097367 carbohydrate derivative binding; GO:0032553 ribonucleotide binding; GO:0005488 binding; GO:0032550 purine ribonucleoside binding; GO:0043168…
G5E8R1	IPI00831330	Tpm1	TPM1	tropomyosin alpha-1 chain isoform 6	1.898	1.853	1.8755	1.523	1.51	1.5165	1.385	1.465	1.425	-0.770016	0.0732569	1.195	1.227	1.211	1.219	1.277	1.248	1.193	1.271	1.232	0.113461	0.830539
P40630	IPI00112822	Tfam	mtTFA-A	Isoform Mitochondrial of Transcription factor A	1.551	1.638	1.5945	1.525	1.618	1.5715	0.904	1.022	0.963	-0.975809	0.000870745	1.055	1.071	1.063	1.051	1.198	1.1245	1.007	1.198	1.1025	0.113094	0.831082
Q62446	IPI00126000	Fkbp3	FKBP3	Peptidyl-prolyl cis-trans isomerase FKBP3	1.633	1.444	1.5385	1.417	1.287	1.352	1.095	1.172	1.1335	-0.878897	0.0211109	1.165	1.043	1.104	1.358	1.225	1.2915	1.278	1.109	1.1935	0.107306	0.839659
Q9ERG0	IPI00112339	Lima1	LIMA1	Isoform Alpha of LIM domain and actin-binding protein 1	1.587	1.67	1.6285	1.729	1.582	1.6555	1.433	1.532	1.4825	-0.762053	0.0781922	1.229	1.26	1.2445	1.492	1.557	1.5245	1.346	1.39	1.368	0.102955	0.846113	GO:0043169 cation binding; GO:0046872 metal ion binding; GO:0008270 zinc ion binding; GO:0046914 transition metal ion binding; GO:0005488 binding; GO:0043167 ion binding;
Q61478	IPI00121311	Csda	YBOX3	DbpA murine homologue	1.801	1.87	1.8355	1.547	1.72	1.6335	1.745	1.763	1.754	-0.0522463	0.921702	1.332	1.256	1.294	1.132	1.081	1.1065	1.191	1.304	1.2475	0.0969353	0.855052	GO:0097159 organic cyclic compound binding; GO:1901363 heterocyclic compound binding; GO:0003677 DNA binding; GO:0005488 binding; GO:0003676 nucleic acid binding;
O70251	IPI00320208	Eef1b2	EF1B	Elongation factor 1-beta	1.703	1.754	1.7285	1.486	1.825	1.6555	1.224	1.385	1.3045	-0.86094	0.0276618	1.154	1.274	1.214	1.313	1.451	1.382	1.304	1.274	1.289	0.0878867	0.868509	GO:0097159 organic cyclic compound binding; GO:1901363 heterocyclic compound binding; GO:0003723 RNA binding; GO:0008135 translation factor activity, RNA binding; GO:0003746 translation elongation factor activity; GO:0005488 binding; GO:0003676 nucleic acid binding;
Q8VCR2	IPI00122464	Hsd17b13	DHB13	Isoform 1 of 17-beta-hydroxysteroid dehydrogenase 13	0.625	0.591	0.608	0.518	0.449	0.4835	1.065	1.211	1.138	0.92523	0.0081768	0.67	0.669	0.6695	0.572	0.562	0.567	0.607	0.646	0.6265	-0.0777127	0.883666
Q8VE97	IPI00139364	Srsf4	SRSF4	Serine/arginine-rich splicing factor 4	1.994	2.916	2.455		2.833	2.833		1.639	1.639	-0.685313	0.314687	2.818	1.286	2.052	1.823	1.046	1.4345	2.107	1.427	1.767	-0.0550239	0.917547	GO:0097159 organic cyclic compound binding; GO:1901363 heterocyclic compound binding; GO:1901265 nucleoside phosphate binding; GO:0005488 binding; GO:0003676 nucleic acid binding; GO:0000166 nucleotide binding; GO:0036094 small molecule binding;
Q9CPU0	IPI00321734	Glo1	LGUL	Lactoylglutathione lyase	1.081	1.187	1.134	1.827	1.632	1.7295	0.742	1.198	0.97	-0.482208	0.33275	0.958	1.295	1.1265	0.743	1.079	0.911	1.153	0.909	1.031	-0.0533807	0.920005	GO:0004462 lactoylglutathione lyase activity; GO:0046872 metal ion binding; GO:0043169 cation binding; GO:0016829 lyase activity; GO:0016846 carbon-sulfur lyase activity; GO:0003824 catalytic activity; GO:0005488 binding; GO:0043167 ion binding;
Q64010	IPI00307991	Crk	CRK	Isoform Crk-II of Adapter molecule crk	1.048	1.025	1.0365	0.871	0.904	0.8875	0.561	0.769	0.665	-0.90244	0.0138126	1.064	1.133	1.0985	0.952	1.106	1.029	0.956	1.174	1.065	-0.0510664	0.923467	GO:0005515 protein binding; GO:0005488 binding;
Q99LG0	IPI00116875	Usp16	UBP16	Ubiquitin carboxyl-terminal hydrolase 16	1.486	1.521	1.5035	1.046	1.145	1.0955	1.306	1.524	1.415	0.131962	0.803207	1.856	1.781	1.8185	1.877	1.726	1.8015	1.76	1.853	1.8065	-0.0503665	0.924514	GO:0004843 thiol-dependent ubiquitin-specific protease activity; GO:0008233 peptidase activity; GO:0046914 transition metal ion binding; GO:0036459 thiol-dependent ubiquitinyl hydrolase activity; GO:0003824 catalytic activity; GO:0005488 binding; GO:0043167 ion binding; GO:0043169 cation binding; GO:0046872 metal ion binding; GO:0101005 ubiquitinyl hydrolase activity; GO:0070011 peptidase activit…
Q8C483	IPI00225307	Sars	SYSC	seryl-tRNA synthetase, cytoplasmic isoform 1	0.985	0.979	0.982	1.035	1.072	1.0535	1.497	1.73	1.6135	0.969735	0.00136008	1.132	1.034	1.083	0.873	0.833	0.853	0.995	1.03	1.0125	0.0439949	0.93405	GO:0016876 ligase activity, forming aminoacyl-tRNA and related compounds; GO:0004828 serine-tRNA ligase activity; GO:0005524 ATP binding; GO:1901265 nucleoside phosphate binding; GO:0016875 ligase activity, forming carbon-oxygen bonds; GO:0016874 ligase activity; GO:0001882 nucleoside binding; GO:0043167 ion binding; GO:0000166 nucleotide binding; GO:0097159 organic cyclic compound binding; GO:19…
Q80XU3	IPI00341869	Nucks1	NUCKS	Nuclear ubiquitous casein and cyclin-dependent kinases substrate	1.032	1.161	1.0965	0.995	0.962	0.9785	0.55	0.491	0.5205	-0.985747	0.000303259	0.933	0.836	0.8845	1.431	1.435	1.433	1.586	0.619	1.1025	0.0347661	0.947872
P08030	IPI00128491	Aprt	APRT	Adenine phosphoribosyltransferase	0.748	0.737	0.7425	0.595	0.684	0.6395		0.621	0.621	-0.615168	0.269418		0.969	0.969	1.257	0.924	1.0905		1.042	1.042	0.0485464	0.951454	GO:0003999 adenine phosphoribosyltransferase activity; GO:0016763 transferase activity, transferring pentosyl groups; GO:0016757 transferase activity, transferring glycosyl groups; GO:0003824 catalytic activity; GO:0016740 transferase activity;
Q91WG0	IPI00128121	Ces2	EST2C	carboxylesterase 2 precursor	1.359	1.291	1.325	1.15	1.176	1.163	2.838	2.787	2.8125	0.965142	0.00180148	0.958	0.946	0.952	1.396	1.381	1.3885	1.051	1.135	1.093	-0.0279228	0.958127
P55937	IPI00336281	Golga3	GOGA3	Uncharacterized protein	1.47	1.544	1.507	1.306	1.315	1.3105	1.035	1.119	1.077	-0.939322	0.00541094	1.3	1.378	1.339	1.286	1.114	1.2	1.259	1.317	1.288	-0.0148281	0.977759
P62073	IPI00165902	Timm10	TIM10	Mitochondrial import inner membrane translocase subunit Tim10	1.942	1.499	1.7205	2.481	1.51	1.9955	2.25	2.139	2.1945	0.480258	0.334998	0.979	1.276	1.1275	1.302	1.753	1.5275	1.485	1.046	1.2655	-0.00236291	0.996456
